# Supplementary material for: Quinoline-derived NNP-manganese complex catalyzed α-alkylation of ketones with primary alcohols
Source: Royal Society of Chemistry journal article supplement (doi:10.1039/d4ob00827h), 2024-01-01

# Manganese-Catalyzed $\alpha$ -Alkylation of Ketones with Primary Alcohols

Peidong Song,<sup>\*a</sup> Haojie Rong,<sup>a</sup> Tingting Meng,<sup>a</sup> Zhe Cui,<sup>a</sup> Mingzhen Mao,<sup>a</sup> and Cuifeng Yang<sup>\*a</sup>

<sup>a</sup>Modern Chemistry Research Institute of Xi'an, Xi'an 710065, China

E-mail: 173489791@qq.com

## Table of Contents

|                                                                                                  |    |
|--------------------------------------------------------------------------------------------------|----|
| 1. General Information.....                                                                      | 2  |
| 2. Preparation of Quinoline-derived NNP Ligand Chelated Catalyst <b>Mn-1</b> .....               | 3  |
| 3. Procedures for Manganese-Catalyzed $\alpha$ -Alkylation of Ketones with Primary Alcohols..... | 4  |
| 4. Procedures for Synthesis of Quinolones.....                                                   | 9  |
| 5. X-Ray Crystallographic Data of <b>Mn-1</b> .....                                              | 11 |
| 6. References.....                                                                               | 13 |
| 7. NMR Spectra.....                                                                              | 14 |

## 1. General Information:

**General.** Unless otherwise noted, all oxygen- and moisture-sensitive reactions were carried out in a flame-dried, sealed Schlenk reaction tube under an atmosphere of nitrogen. Analytical thin-layer chromatography (TLC) was performed on glass plates coated with 0.25 mm 230-400 mesh silica gel containing a fluorescent indicator. Visualization was accomplished by exposure to a UV lamp. All the products in this article are compatible with standard silica gel chromatography. Column chromatography was performed on silica gel (200-300 mesh) using standard methods.

**Structural Analysis.** NMR spectra were measured on a Bruker Avance-500 spectrometer and chemical shifts ( $\delta$ ) are reported in parts per million (ppm).  $^1\text{H}$  NMR spectra were recorded at 500 MHz in NMR solvents and referenced internally to corresponding solvent resonance,  $^{13}\text{C}$  NMR spectra were recorded at 126 MHz,  $^{31}\text{P}$  NMR spectra were recorded at 202 MHz. The signals were referenced to residual chloroform (7.26 ppm,  $^1\text{H}$ , 77.00 ppm,  $^{13}\text{C}$ ). Coupling constants are reported in Hz with multiplicities denoted as s (singlet), d (doublet), t (triplet), q (quartet), m (multiplet), bs (broad singlet) and bq (broad quartet). High resolution mass spectra (HRMS) data were obtained on a Thermo Fisher TSQ Quantis LC/MS spectrometer with ESI source. X-ray crystallography was measured on an APEXII DVO diffractometer.

**Materials.** Commercial reagents and solvent were purchased from J&K, Sigma-Aldrich, Alfa Aesar, TCI, Energy chemicals and used as received unless otherwise stated.

## 2. Preparation of Quinoline-derived NNP Ligand Chelated Catalyst Mn-1

### 2.1 Synthesis of quinoline-derived NNP ligand (L1)

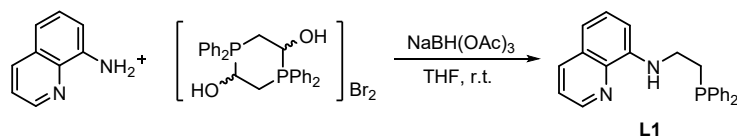

A vial was charged with 8-aminoquinoline (1.44 g, 10 mmol), the  $\alpha$ -phosphinoacetaldehydes dimer<sup>[1]</sup> (3.09 g, 5 mmol), sodium(triacetoxy)borohydride (4.24 g, 20 mmol), 3Å molecular sieves and degas THF (40 mL). The blood-red mixture was stirred for overnight under ambient atmosphere at room temperature. The reaction mixture was filtered, the filter cake was rinsed with degas DCM (40 mL) and concentrated under reduced pressure. The residue was purified by neutral alumina fast under ambient atmosphere (*n*-hexane: EtOAc = 10:1) to give the desired product **L1** as a yellow oil (2.14 g, 60% yield). <sup>1</sup>H NMR (500 MHz, CDCl<sub>3</sub>)  $\delta$  8.67 (d, *J* = 2.6 Hz, 1H), 8.00 (d, *J* = 6.6 Hz, 1H), 7.46 (m, 4H), 7.32 (m, 8H), 7.01 (d, *J* = 8.1 Hz, 1H), 6.51 (d, *J* = 7.6 Hz, 1H), 6.31 (s, 1H), 3.45 (dt, *J* = 11.4, 5.5 Hz, 2H), 2.60 – 2.46 (m, 2H). <sup>13</sup>C NMR (126 MHz, CDCl<sub>3</sub>)  $\delta$  146.8, 144.2, 138.2, 138.1, 135.9, 132.9, 132.7, 128.8, 128.7, 128.6, 128.5, 128.1, 127.7, 121.4, 113.9, 104.7, 40.5, 40.3, 28.4, 28.3. <sup>31</sup>P{<sup>1</sup>H} NMR (202 MHz, CDCl<sub>3</sub>):  $\delta$  -21.01. HRMS-ESI *m/z*: [M+H]<sup>+</sup> calculated for C<sub>23</sub>H<sub>22</sub>N<sub>2</sub>P: 357.1515, found: 357.1523.

### 2.2 Synthesis of catalyst Mn-1

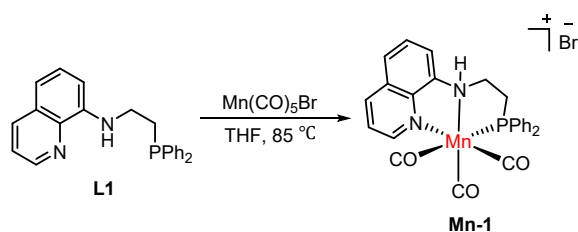

A flame dried Schlenk tube was charged with manganese pentacarbonyl bromide (825 mg, 3.0 mmol, 1.0 eq.) and the NNP ligand **L1** (1.18 g, 3.3 mmol, 1.1 eq.). The tube was evacuated and backfilled with nitrogen for three times. THF (30 mL) was added and the resulting orange suspension was heated to 80 °C and stirred for 20 h. The solution was allowed to cool to room temperature and THF was removed in vacuo. The reaction mixture was filtered, and the solid was washed with diethyl ether and *n*-hexane (3 x 5 mL), which on evaporation gave a yellow solid product **Mn-1** (1.6 g, 86% yield). Yellow single crystals were obtained by slow diffusion of *n*-hexane into a saturated solution of **Mn-1** in CHCl<sub>3</sub> at 0 °C. <sup>1</sup>H NMR (500 MHz, DMSO-*d*<sub>6</sub>)  $\delta$  9.61 (s, 1H), 8.61 (dd, *J* = 16.1, 6.5 Hz, 2H), 8.31 (d, *J* = 7.4 Hz, 1H), 8.14 (d, *J* = 8.0 Hz, 1H), 7.92 (m, 3H), 7.65 (m, 3H), 7.52 – 7.33 (m, 2H), 7.26 (t, *J* = 7.6 Hz, 2H), 6.98 (t, *J* = 8.9 Hz, 2H), 4.11 (m, 1H), 3.22 (m, 2H), 1.84 – 1.57 (m, 1H). <sup>13</sup>C NMR (126 MHz, DMSO-*d*<sub>6</sub>)  $\delta$  156.6, 146.1, 142.6, 139.2, 132.5, 132.4, 132.0, 131.4, 131.0, 131.0, 130.9, 130.0, 129.9, 129.9, 129.6, 129.5, 129.3, 128.6, 128.2, 124.5, 57.1, 57.0, 20.7, 20.5. <sup>31</sup>P NMR (202 MHz, DMSO-*d*<sub>6</sub>)  $\delta$  67.37. HRMS-ESI *m/z*: [M-Br]<sup>+</sup> calculated for C<sub>26</sub>H<sub>21</sub>MnN<sub>2</sub>O<sub>3</sub>P: 495.0670, found: 495.0683.

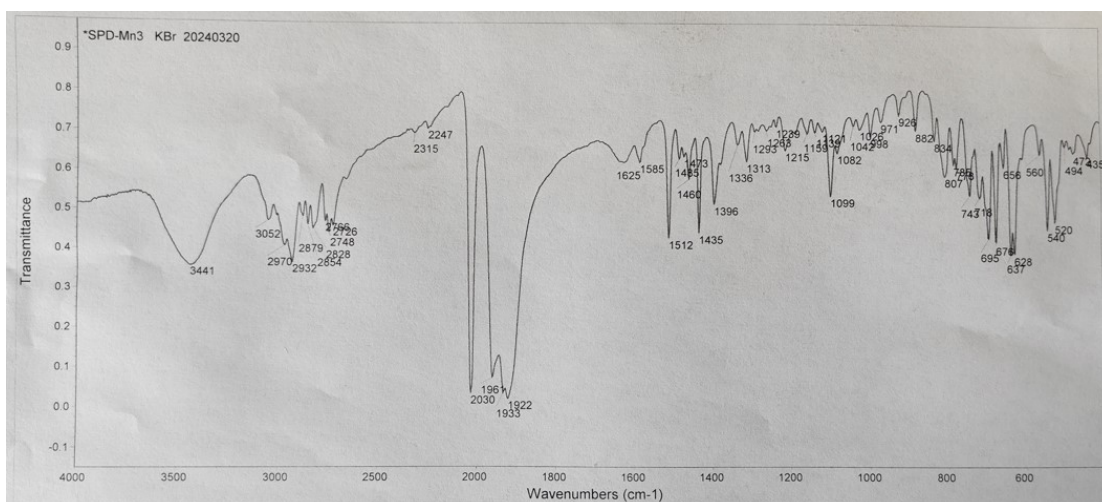

**Figure S1.** IR spectrum of **Mn-1** on KBr plate.

### 3. Procedures for Manganese-Catalyzed $\alpha$ -Alkylation of Ketones with Primary Alcohols

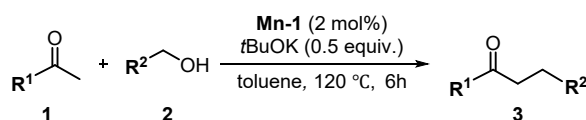

A flame dried Schlenk tube was charged with **Mn-1** (0.01 mmol), *t*BuOK (0.25 mmol), ketone **1** (0.5 mmol) and alcohol **2** (0.6 mmol). The tube was evacuated and backfilled with nitrogen for three times. Toluene (1 mL) was added and the mixture was stirred at 120 °C for 6 h. After completion of the reaction, the reaction mixture was cooled to ambient temperature and 5 mL of water was added and the aqueous solution extracted with EtOAc (3 × 5 mL). Combined organic layers were washed with saturated brine, dried over anhydrous Na<sub>2</sub>SO<sub>4</sub> and concentrated under reduced pressure. The crude product was then purified by silica gel column chromatography (*n*-hexane/EtOAc = 10:1) to give the corresponding product **3**.

#### Gram-scale synthesis of **3a**

A flame dried Schlenk tube equipped with a stir bar was charged with **Mn-1** (95.5 mg, 0.17 mmol), *t*BuOK (466 mg, 4.15 mmol), acetophenone **1a** (1 g, 8.3 mmol), phenylmethanol **2a** (984 mg, 9.1 mmol) and toluene (15 mL) under nitrogen. Then the reaction mixture was stirred for 10 h at 120 °C. After this time, the reaction mixture was cooled to ambient temperature and 30 mL of water was added and the aqueous solution extracted with EtOAc (3 × 30 mL). Combined organic layers were washed with saturated brine, dried over anhydrous Na<sub>2</sub>SO<sub>4</sub> and concentrated under reduced pressure. The reaction mixture was purified by silica gel column chromatography (*n*-hexane/EtOAc = 10:1) to afford the desired product **3a** as a white solid (1.52 g, 87% yield).

#### 1,3-Diphenylpropan-1-one (**3a**) [2]:

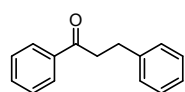

<sup>1</sup>H NMR (500 MHz, CDCl<sub>3</sub>) δ 7.95 (d, *J* = 7.3 Hz, 2H), 7.53 (t, *J* = 7.4 Hz, 1H), 7.41 (t, *J* = 7.6 Hz, 2H), 7.31 – 7.27 (m, 4H), 7.19 (t, *J* = 7.0 Hz, 1H), 3.45 – 3.22 (m, 2H), 3.13 – 2.95 (m, 2H). <sup>13</sup>C NMR (126 MHz, CDCl<sub>3</sub>) δ 199.2, 141.3, 136.8, 133.1, 128.6, 128.5, 128.4, 128.0, 126.1, 40.4, 30.1.

**3-Phenyl-1-(p-tolyl)propan-1-one (3b)** <sup>[2]</sup>: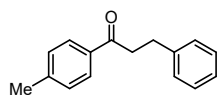

White solid, 98.7 mg, 88% yield. <sup>1</sup>H NMR (500 MHz, CDCl<sub>3</sub>) δ 7.87 (d, *J* = 8.2 Hz, 2H), 7.31 – 7.29 (m, 2H), 7.28 – 7.24 (m, 4H), 7.21 (t, *J* = 7.0 Hz, 1H), 3.28 – 3.25 (m, 2H), 3.07 – 3.04 (m, 2H), 2.40 (s, 3H). <sup>13</sup>C NMR (126 MHz, CDCl<sub>3</sub>) δ 198.9, 143.8, 141.4, 134.4, 129.3, 128.5, 128.4, 128.2, 126.1, 40.4, 30.2, 21.6.

**1-(2-Methoxyphenyl)-3-phenylpropan-1-one (3c)** <sup>[6]</sup>: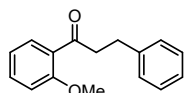

White solid, 110.5 mg, 92% yield. <sup>1</sup>H NMR (500 MHz, CDCl<sub>3</sub>) δ 7.68 (dd, *J* = 7.6, 1.8 Hz, 1H), 7.47 – 7.43 (m, 1H), 7.30 – 7.23 (m, 4H), 7.19 (t, *J* = 7.2 Hz, 2H), 7.00 (t, *J* = 7.6 Hz, 1H), 6.95 (d, *J* = 8.2 Hz, 1H), 3.87 (s, 3H), 3.30 (t, *J* = 7.6 Hz, 2H), 3.02 (t, *J* = 7.8 Hz, 2H). <sup>13</sup>C NMR (126 MHz, CDCl<sub>3</sub>) δ 201.7, 158.5, 141.7, 133.4, 130.4, 128.5, 128.4, 128.4, 125.9, 120.7, 111.5, 55.5, 45.4, 30.5.

**1-(3-Methoxyphenyl)-3-phenylpropan-1-one (3d)** <sup>[3]</sup>: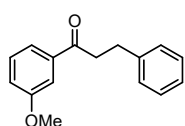

Pale yellow solid, 106.9 mg, 89% yield. <sup>1</sup>H NMR (500 MHz, CDCl<sub>3</sub>) δ 7.53 (d, *J* = 8.0 Hz, 1H), 7.48 (s, 1H), 7.34 (t, *J* = 8.0 Hz, 1H), 7.30 (t, *J* = 7.6 Hz, 2H), 7.25 (d, *J* = 7.6 Hz, 2H), 7.20 (t, *J* = 7.6 Hz, 1H), 7.09 (dd, *J* = 8.0 Hz, *J* = 3.0 Hz, 1H), 3.84 (s, 3H), 3.28 (t, *J* = 7.6 Hz, 2H), 3.06 (t, *J* = 7.6 Hz, 2H); <sup>13</sup>C NMR (125 MHz, CDCl<sub>3</sub>) δ 199.0, 159.9, 141.3, 138.3, 129.6, 128.5, 128.4, 126.1, 120.7, 119.6, 112.3, 55.4, 40.6, 30.2.

**1-(4-Methoxyphenyl)-3-phenylpropan-1-one (3e)** <sup>[3]</sup>: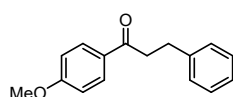

Pale yellow solid, 112.9 mg, 94% yield. <sup>1</sup>H NMR (500 MHz, CDCl<sub>3</sub>) δ 7.94 (d, *J* = 8.0 Hz, 2 H), 7.29 (t, *J* = 7.6 Hz, 2 H), 7.25 (d, *J* = 7.0 Hz, 2H), 7.19 (t, *J* = 7.0 Hz, 1 H), 6.92 (d, *J* = 8.0 Hz, 2 H), 3.84 (s, 3 H), 3.24 (t, *J* = 7.6 Hz, 2H), 3.05 (t, *J* = 7.6 Hz, 2 H); <sup>13</sup>C NMR (126 MHz, CDCl<sub>3</sub>) δ 197.8, 163.5, 141.5, 130.3, 130.0, 128.5, 128.4, 126.1, 113.7, 55.5, 40.1, 30.4.

**1-Mesityl-3-phenylpropan-1-one (3f)** <sup>[4]</sup>: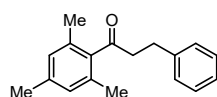

Colorless liquid, 117.3 mg, 93% yield. <sup>1</sup>H NMR (500 MHz, CDCl<sub>3</sub>) δ = 7.29 – 7.18 (m, 5H), 6.81 (s, 2H), 3.06 – 2.99 (m, 4H), 2.26 (s, 3H), 2.11 (s, 6H). <sup>13</sup>C NMR (126 MHz, CDCl<sub>3</sub>) δ 209.7, 141.0, 139.5, 138.4, 132.6, 128.5, 128.5, 126.1, 46.4, 29.5, 21.0, 19.0.

**1-(4-(Dimethylamino)phenyl)-3-phenylpropan-1-one (3g)** <sup>[7]</sup>: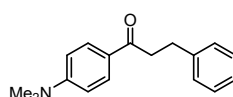

White solid, 116.5 mg, 92% yield. <sup>1</sup>H NMR (500 MHz, CDCl<sub>3</sub>) δ 7.87 (d, *J* = 9.0 Hz, 2H), 7.30 – 7.24 (m, 4H), 7.18 (t, *J* = 7.0 Hz, 1H), 6.63 (d, *J* = 9.0 Hz, 2H), 3.19 (t, *J* = 7.6 Hz, 2H), 3.06 – 3.03 (m, 8H). <sup>13</sup>C NMR (126 MHz, CDCl<sub>3</sub>) δ 197.4, 153.4, 141.9, 130.3, 128.5, 126.0, 124.9, 110.7, 40.0, 39.8, 30.7.

**1-(4-Fluorophenyl)-3-phenylpropan-1-one (3h)** <sup>[4]</sup>: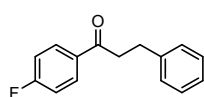

Colorless liquid, 89 mg, 78% yield. <sup>1</sup>H NMR (500 MHz, CDCl<sub>3</sub>) δ = 7.98 – 7.95 (m, 2H), 7.31 – 7.20 (m, 5H), 7.11 (t, *J* = 8.6, 2H), 3.26 (t, *J* = 7.8, 2H), 3.06 (t, *J* = 7.8, 2H). <sup>13</sup>C NMR (126 MHz, CDCl<sub>3</sub>) δ 197.6, 165.6 (d, <sup>1</sup>*J*<sub>CF</sub> = 253), 141.1, 133.2 (d, <sup>4</sup>*J*<sub>CF</sub> = 3), 130.7 (d, <sup>3</sup>*J*<sub>CF</sub> = 9), 128.4, 128.4, 126.2, 115.6 (d, <sup>2</sup>*J*<sub>CF</sub> = 21), 40.4, 30.1.

**1-(4-Chlorophenyl)-3-phenylpropan-1-one (3i)** <sup>[4]</sup>: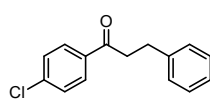

Pale yellow solid, 99.1 mg, 81% yield. <sup>1</sup>H NMR (500 MHz, CDCl<sub>3</sub>) δ = 7.87 (d, *J* = 8.6, 2H), 7.40 (d, *J* = 8.6, 2H), 7.31 – 7.19 (m, 5H), 3.26 (t, *J* = 7.6, 2H), 3.06 (t, *J* = 7.6, 2H). <sup>13</sup>C NMR (126 MHz, CDCl<sub>3</sub>) δ 198.0, 141.1, 139.5, 135.2, 129.5, 128.9, 128.6, 128.4, 126.2, 40.4, 30.1.

**1-(4-Bromophenyl)-3-phenylpropan-1-one (3j)** <sup>[4]</sup>: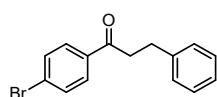

Pale yellow solid, 120 mg, 83% yield. <sup>1</sup>H NMR (400 MHz, CDCl<sub>3</sub>) δ = 7.80 (d,

$J=8.4$ , 2H), 7.58 (d,  $J=8.4$ , 2H), 7.31 – 7.20 (m, 5H), 3.25 (t,  $J=7.6$ , 1H), 3.05 (t,  $J=7.6$ , 1H).  $^{13}\text{C}$  NMR (126 MHz,  $\text{CDCl}_3$ )  $\delta$  198.1, 141.0, 135.6, 131.9, 129.6, 128.6, 128.4, 128.2, 126.2, 40.4, 30.1.

**1-(4-Iodophenyl)-3-phenylpropan-1-one (3k)**<sup>[18]</sup>:

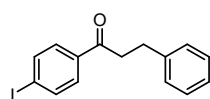

Pale yellow solid, 141.2 mg, 84% yield.  $^1\text{H}$  NMR (500 MHz,  $\text{CDCl}_3$ )  $\delta$  7.81 (d,  $J=8.4$ , 2H), 7.66 (d,  $J=8.4$ , 2H), 7.32 – 7.20 (m, 5H), 3.25 (t,  $J=7.6$ , 1H), 3.05 (t,  $J=7.6$ , 1H).  $^{13}\text{C}$  NMR (126 MHz,  $\text{CDCl}_3$ )  $\delta$  198.5, 141.0, 137.9, 136.1, 129.4, 128.6, 128.4, 126.2, 101.0, 40.3, 30.0.

**4-(3-Phenylpropanoyl)benzonitrile (3l)**<sup>[17]</sup>

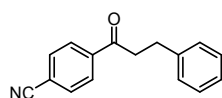

Yellow oil, 72.9 mg, 62% yield.  $^1\text{H}$  NMR (500 MHz,  $\text{CDCl}_3$ ):  $\delta$  8.01 (d,  $J = 8.4$  Hz, 2H), 7.73 (d,  $J = 8.4$  Hz, 2H), 7.34 – 7.26 (m, 2H), 7.24 – 7.18 (m, 3H), 3.31 (t,  $J = 7.5$  Hz, 2H), 3.07 (t,  $J = 7.5$  Hz, 2H);  $^{13}\text{C}$  NMR (126 MHz,  $\text{CDCl}_3$ ):  $\delta$  197.8, 140.7, 139.8, 132.5, 128.6, 128.5, 128.4, 126.4, 117.9, 116.3, 40.7, 29.9;

**1-(4-Nitrophenyl)-3-phenylpropan-1-one (3m)**<sup>[17]</sup>

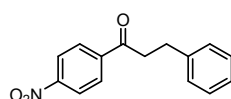

Yellow oil, 61.3 mg, 48% yield.  $^1\text{H}$  NMR (500 MHz,  $\text{CDCl}_3$ ):  $\delta$  8.29 (d,  $J = 8.8$  Hz, 2H), 8.09 (d,  $J = 8.8$  Hz, 2H), 7.36-7.27 (m, 2H), 7.27-7.20 (m, 3H), 3.35 (t,  $J = 7.5$  Hz, 2H), 3.09 (t,  $J = 7.5$  Hz, 2H);  $^{13}\text{C}$  NMR (126 MHz,  $\text{CDCl}_3$ ):  $\delta$  197.6, 150.3, 141.2, 140.6, 129.1, 128.7, 128.4, 126.4, 123.9, 41.0, 29.9;

**1-(Naphthalen-2-yl)-3-phenylpropan-1-one (3n)**<sup>[4]</sup>:

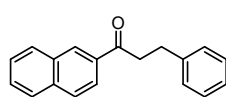

Yellow solid, 115.8 mg, 89% yield.  $^1\text{H}$  NMR (500 MHz,  $\text{CDCl}_3$ )  $\delta = 8.45$  (s, 1H), 8.02 (m, 1H), 7.93 – 7.85 (m, 3H), 7.59 – 7.51 (m, 2H), 7.33 – 7.20 (m, 5H), 3.43 (t,  $J=7.6$ , 2H), 3.12 (t,  $J=7.6$ , 2H).  $^{13}\text{C}$  NMR (126 MHz,  $\text{CDCl}_3$ )  $\delta$  199.2, 141.4, 135.6, 134.2, 132.5, 129.7, 129.6, 128.6, 128.5, 128.5, 127.8, 126.8, 126.2, 123.9, 40.6, 30.3.

**3-Phenyl-1-(pyridin-3-yl)propan-1-one (3o)**<sup>[2]</sup>:

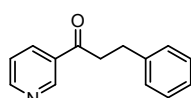

Yellowish oil, 82.4 mg, 78% yield.  $^1\text{H}$  NMR (500 MHz,  $\text{CDCl}_3$ )  $\delta$  9.16 (s, 1 H), 8.77 (d,  $J = 4.5$  Hz, 1 H), 8.22 (d,  $J = 8.0$  Hz, 1 H), 7.40 (dd,  $J = 8.0, 4.5$  Hz, 1 H), 7.30 (t,  $J = 7.5$  Hz, 2 H), 7.25 (d,  $J = 7.5$  Hz, 2 H), 7.20 (t,  $J = 7.5$  Hz, 1 H), 3.32 (t,  $J = 7.6$  Hz, 2 H), 3.08 (t,  $J = 7.6$  Hz, 2 H);  $^{13}\text{C}$  NMR (126 MHz,  $\text{CDCl}_3$ )  $\delta$  198.0, 153.5, 149.6, 140.7, 135.3, 132.1, 128.6, 128.4, 126.3, 123.6, 40.7, 29.8.

**1-(Furan-2-yl)-3-phenylpropan-1-one (3p)**<sup>[2]</sup>:

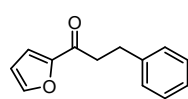

Slightly yellow oil, 71.1 mg, 71% yield.  $^1\text{H}$  NMR (500 MHz,  $\text{CDCl}_3$ )  $\delta$  7.57 (dd,  $J = 1.6, 0.6$  Hz, 1H), 7.30 – 7.16 (m, 6H), 6.52 (dd,  $J = 3.6, 1.7$  Hz, 1H), 3.21 – 3.13 (m, 2H), 3.08 – 3.02 (m, 2H).  $^{13}\text{C}$  NMR (126 MHz,  $\text{CDCl}_3$ )  $\delta$  188.5, 152.7, 146.3, 141.0, 128.5, 128.4, 126.2, 117.0, 112.2, 40.2, 30.0.

**3-Phenyl-1-(thiophen-2-yl)propan-1-one (3q)**<sup>[2]</sup>:

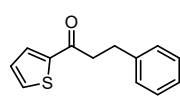

Slightly yellow oil, 87.6 mg, 81% yield.  $^1\text{H}$  NMR (500 MHz,  $\text{CDCl}_3$ )  $\delta$  7.68 (d,  $J = 3.7$  Hz, 1H), 7.61 (d,  $J = 4.9$  Hz, 1H), 7.31 – 7.18 (m, 5H), 7.10 (dd,  $J = 3.8, 4.8$  Hz, 1H), 3.22 (t,  $J = 7.7$  Hz, 2H), 3.07 (dd,  $J = 6.8, 8.6$  Hz, 2H);  $^{13}\text{C}$  NMR (126 MHz,  $\text{CDCl}_3$ )  $\delta$  192.1, 144.2, 141.0, 133.5, 131.8, 128.6, 128.4, 128.1, 126.2, 41.2, 30.4.

**2-Benzyl-3,4-dihydronaphthalen-1(2H)-one (3r)**<sup>[3]</sup>:

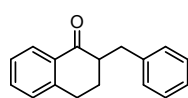

Pale yellow solid, 100.4 mg, 85% yield.  $^1\text{H}$  NMR (500 MHz,  $\text{CDCl}_3$ )  $\delta$  8.07 (d,  $J = 8.0$  Hz, 1 H), 7.46 (t,  $J = 7.5$  Hz, 1 H), 7.33 – 7.29 (m, 3 H), 7.25 – 7.20 (m, 4 H), 3.50 (dd,  $J = 14.0, 4.0$  Hz, 1 H), 2.95 – 2.91 (m, 2 H), 2.77 – 2.73 (m, 1 H), 2.64 (dd,  $J = 14.0, 10.0$  Hz, 1 H), 2.13 – 2.09 (m, 1 H), 1.83 – 1.75 (m, 1H);  $^{13}\text{C}$  NMR (126 MHz,  $\text{CDCl}_3$ )  $\delta$

199.3, 144.0, 140.1, 133.2, 132.5, 129.3, 128.7, 128.4, 127.6, 126.6, 126.1, 49.5, 35.7, 28.6, 27.7.

**2-Benzyl-2,3-dihydro-1H-inden-1-one (3s) <sup>[19]</sup>:**

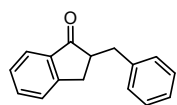

Pale yellow oil, 91.1 mg, 82% yield. <sup>1</sup>H NMR (500 MHz, CDCl<sub>3</sub>) δ 7.78 (d, *J* = 7.7 Hz, 1H), 7.56 (t, *J* = 7.0 Hz, 1H), 7.43 – 7.34 (m, 2H), 7.32 – 7.18 (m, 5H), 3.40 (dd, *J* = 14.0, 4.0 Hz, 1H), 3.16 (dd, *J* = 17.2, 8.0 Hz, 1H), 3.04 – 2.95 (m, 1H), 2.86 (dd, *J* = 17.0, 3.8 Hz, 1H), 2.67 (dd, *J* = 13.8, 10.6 Hz, 1H); <sup>13</sup>C NMR (126 MHz, CDCl<sub>3</sub>) δ 207.8, 153.6, 139.7, 136.6, 134.8, 128.9, 128.5, 127.4, 126.6, 126.4, 124.0, 49.0, 37.0, 32.2.

**1-(4-Methoxyphenyl)-2-methyl-3-phenylpropan-1-one (3t) <sup>[18]</sup>:**

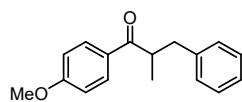

Colorless oil, 91.1 mg, 79% yield. <sup>1</sup>H NMR (500 MHz, CDCl<sub>3</sub>): δ 7.93 (d, *J* = 7.8 Hz, 2H), 7.29 – 7.26 (m, 2H), 7.22 – 7.17 (m, 3H), 6.94 – 6.92 (m, 2H), 3.86 (s, 3H), 3.75 – 3.68 (m, 1H), 3.19 – 3.15 (m, 1H), 2.72 – 2.68 (m, 1H), 1.20 (d, *J* = 7.2 Hz, 3H). <sup>13</sup>C NMR (126 MHz, CDCl<sub>3</sub>): δ 202.2, 163.3, 140.0, 130.5, 129.0, 129.1, 128.3, 126.0, 113.7, 55.4, 42.3, 39.5, 17.5.

**2-Benzylcyclohexan-1-one (3u) <sup>[19]</sup>:**

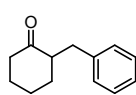

Colorless oil, 54.6 mg, 58% yield. <sup>1</sup>H NMR (500 MHz, CDCl<sub>3</sub>) δ 7.20 – 7.18 (m, 2H), 7.16 – 7.05 (m, 3H), 3.14 (dd, *J* = 13.8 Hz, *J* = 5.2 Hz, 1H), 2.48 – 2.43 (m, 1H), 2.36 – 2.22 (m, 3H), 1.99 – 1.90 (m, 2H), 1.75 – 1.71 (m, 1H), 1.61 – 1.46 (m, 2H), 1.27 – 1.20 (m, 1H); <sup>13</sup>C NMR (126 MHz, CDCl<sub>3</sub>) δ 212.6, 140.4, 129.2, 128.3, 126.0, 52.5, 42.2, 35.5, 33.4, 28.1, 25.1.

**1-Cyclohexyl-3-phenylpropan-1-one (3v) <sup>[20]</sup>:**

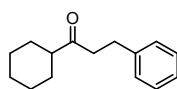

Colorless oil, 71.4 mg, 66% yield. <sup>1</sup>H NMR (500 MHz, CDCl<sub>3</sub>): δ 7.27 (t, *J* = 6.5 Hz, 2H), 7.18 (t, *J* = 6.3 Hz, 3H), 2.88 (t, *J* = 7.6 Hz, 2H), 2.75 (t, *J* = 7.6 Hz, 2H), 2.30 (td, *J* = 11.1, 3.2 Hz, 1H), 1.82–1.75 (m, 4H), 1.68 – 1.62 (m, 1H), 1.35 – 1.13 (m, 5H); <sup>13</sup>C NMR (126 MHz, CDCl<sub>3</sub>): δ 213.1, 141.4, 128.4, 128.3, 126.0, 51.0, 42.2, 29.7, 28.4, 25.9, 25.7;

**3-(4-Chlorophenyl)-1-(4-methoxyphenyl)propan-1-one (3w) <sup>[5]</sup>:**

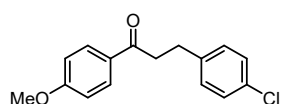

Pale yellow solid, 108.5 mg, 79% yield. <sup>1</sup>H NMR (500 MHz, CDCl<sub>3</sub>) δ 7.93 (d, *J* = 8.8 Hz, 2H), 7.25 (d, *J* = 8.6 Hz, 2H), 7.18 (d, *J* = 8.6 Hz, 2H), 6.92 (d, *J* = 9.2 Hz, 2H), 3.86 (s, 3H), 3.22 (t, *J* = 7.6 Hz, 2H), 3.02 (t, *J* = 7.6 Hz, 2H). <sup>13</sup>C NMR (126 MHz, CDCl<sub>3</sub>) δ 197.4, 163.5, 139.9, 131.8, 130.3, 129.9, 129.8, 128.6, 113.8, 55.5, 39.8, 29.6.

**3-(4-Bromophenyl)-1-(4-methoxyphenyl)propan-1-one (3x) <sup>[10]</sup>:**

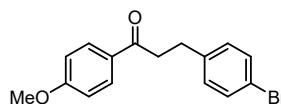

White solid, 121.3 mg, 76% yield. <sup>1</sup>H NMR (500 MHz, CDCl<sub>3</sub>) δ 7.93 (d, *J* = 8.8 Hz, 2H), 7.40 (d, *J* = 8.3 Hz, 2H), 7.12 (d, *J* = 8.3 Hz, 2H), 6.92 (d, *J* = 8.9 Hz, 2H), 3.86 (s, 3H), 3.22 (t, *J* = 7.6 Hz, 2H), 3.01 (t, *J* = 7.6 Hz, 2H). <sup>13</sup>C NMR (126 MHz, CDCl<sub>3</sub>) δ 197.3, 163.5, 140.4, 131.5, 130.3, 130.2, 129.9, 119.8, 113.8, 55.5, 39.7, 29.6.

**3-(2,4-Dimethoxyphenyl)-1-(4-methoxyphenyl)propan-1-one (3y):**

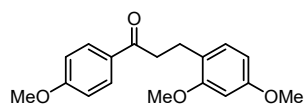

Pale yellow solid, 135.2 mg, 90% yield. <sup>1</sup>H NMR (500 MHz, CDCl<sub>3</sub>) δ 7.95 (d, *J* = 8.9 Hz, 2H), 7.09 (d, *J* = 8.1 Hz, 1H), 6.91 (d, *J* = 9.0 Hz, 2H), 6.45 – 6.41 (m, 2H), 3.85 (s, 3H), 3.80 (s, 3H), 3.78 (s, 3H), 3.16 (t, *J* = 7.6 Hz, 2H), 2.96 (t, *J* = 7.6 Hz, 2H). <sup>13</sup>C NMR (126 MHz, CDCl<sub>3</sub>) δ 198.8, 163.3, 159.5, 158.4, 130.4, 130.3, 130.1, 122.0, 113.6, 103.9, 98.6, 55.4, 55.3, 55.2, 39.0, 25.3. HRMS-ESI *m/z*: [M+H]<sup>+</sup> calculated for C<sub>18</sub>H<sub>21</sub>O<sub>4</sub>: 301.1434, found: 301.1445.

**Methyl 4-(3-oxo-3-phenylpropyl)benzoate (3z)** <sup>[17]</sup>: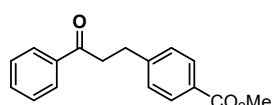

White solid, 93.9 mg, 70% yield. <sup>1</sup>H NMR (500 MHz, CDCl<sub>3</sub>) δ 7.97 – 7.94 (m, 4H), 7.60 – 7.54 (m, 1H), 7.50 – 7.42 (m, 2H), 7.36 – 7.31 (m, 2H), 3.90 (s, 3H), 3.32 (t, *J* = 7.6 Hz, 2H), 3.13 (t, *J* = 7.6 Hz, 2H). <sup>13</sup>C NMR (126 MHz, CDCl<sub>3</sub>) 198.7, 167.0, 146.8, 136.7, 133.2, 129.9, 128.7, 128.5, 128.2, 128.0, 52.0, 39.8, 30.0.

**3-(Furan-2-yl)-1-(4-methoxyphenyl)propan-1-one (3aa):**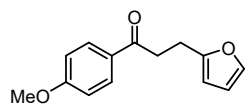

Pale yellow solid, 81.8 mg, 71% yield. <sup>1</sup>H NMR (500 MHz, CDCl<sub>3</sub>) δ 7.95 (d, *J* = 8.7 Hz, 2H), 7.31 (s, 1H), 6.93 (d, *J* = 8.7 Hz, 2H), 6.28 (s, 1H), 6.05 (s, 1H), 3.86 (s, 3H), 3.28 (t, *J* = 7.6 Hz, 2H), 3.08 (t, *J* = 7.6 Hz, 2H). <sup>13</sup>C NMR (126 MHz, CDCl<sub>3</sub>) δ 197.2, 163.5, 155.0, 141.1, 130.3, 129.9, 113.8, 110.2, 105.2, 55.5, 36.6, 22.7. HRMS-ESI *m/z*: [M+H]<sup>+</sup> calculated for C<sub>14</sub>H<sub>15</sub>O<sub>3</sub>: 231.1016, found: 231.1011.

**1-(4-Methoxyphenyl)-3-(naphthalen-2-yl)propan-1-one (3ab)** <sup>[10]</sup>: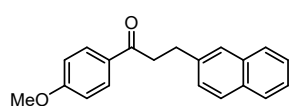

White solid, 122 mg, 84% yield. <sup>1</sup>H NMR (500 MHz, CDCl<sub>3</sub>) δ 7.94 (d, *J* = 5.0 Hz, 2H), 7.79 – 7.76 (m, 3H), 7.67 (d, *J* = 1.6 Hz, 1H), 7.44 – 7.36 (m, 3H), 6.90 (d, *J* = 9.0 Hz, 2H), 3.82 (s, 3H), 3.31 (t, *J* = 7.6 Hz, 2H), 3.21 (t, *J* = 7.6 Hz, 2H). <sup>13</sup>C NMR (126 MHz, CDCl<sub>3</sub>) δ 197.7, 163.5, 139.0, 133.7, 132.1, 130.3, 130.0, 128.1, 127.6, 127.5, 127.2, 126.5, 126.0, 125.3, 113.8, 55.5, 40.0, 30.5.

**3-(Benzo[*d*][1,3]dioxol-5-yl)-1-(4-methoxyphenyl)propan-1-one (3ac)** <sup>[11]</sup>: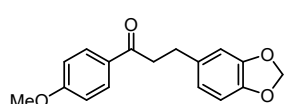

White solid, 122.2 mg, 86% yield. <sup>1</sup>H NMR (500 MHz, CDCl<sub>3</sub>) δ 7.93 (d, *J* = 8.8 Hz, 2H), 6.92 (d, *J* = 5.0 Hz, 2H), 6.73 (d, *J* = 5.0 Hz, 2H), 6.69 (dd, *J* = 8.0, 1.8 Hz, 1H), 5.91 (s, 2H), 3.86 (s, 3H), 3.20 (t, *J* = 7.6 Hz, 2H), 2.97 (t, *J* = 7.6 Hz, 2H). <sup>13</sup>C NMR (126 MHz, CDCl<sub>3</sub>) δ 197.8, 163.5, 147.6, 145.8, 135.3, 130.3, 129.9, 121.2, 113.7, 108.9, 108.3, 100.8, 55.5, 40.3, 30.1.

**1-(4-Methoxyphenyl)octan-1-one (3ad)** <sup>[13]</sup>: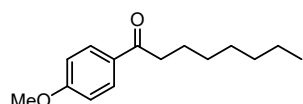

Pale yellow oil, 67.9 mg, 58% yield. <sup>1</sup>H NMR (500 MHz, CDCl<sub>3</sub>) δ 7.94 (d, *J* = 8.8 Hz, 2H), 6.93 (d, *J* = 8.8 Hz, 2H), 3.86 (s, 3H), 2.90 (t, *J* = 7.4 Hz, 2H), 1.76 – 1.70 (m, 2H), 1.37 – 1.27 (m, 8H), 0.88 (t, *J* = 6.7 Hz, 3H). <sup>13</sup>C NMR (126 MHz, CDCl<sub>3</sub>) δ 199.2, 163.3, 130.3, 130.2, 113.6, 55.4, 38.3, 31.7, 29.4, 29.2, 24.7, 22.6, 14.1.

**1-(4-Methoxyphenyl)-4-phenylbutan-1-one (3ae)** <sup>[12]</sup>: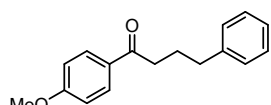

Pale yellow oil, 91.5 mg, 72% yield. <sup>1</sup>H NMR (500 MHz, CDCl<sub>3</sub>) δ 7.90 (d, *J* = 5.0 Hz, 2H), 7.29 (dd, *J* = 8.2, 6.9 Hz, 2H), 7.21 – 7.19 (m, 3H), 6.91 (d, *J* = 5.0 Hz, 2H), 3.86 (s, 3H), 2.92 (t, *J* = 7.4 Hz, 2H), 2.71 (t, *J* = 7.6 Hz, 2H), 2.13 – 2.00 (m, 2H). <sup>13</sup>C NMR (126 MHz, CDCl<sub>3</sub>) δ 198.7, 163.4, 141.8, 130.3, 130.1, 128.5, 128.4, 125.9, 113.7, 55.5, 37.4, 35.3, 25.9.

**1,4-Bis(4-methoxyphenyl)butan-1-one (3af)** <sup>[13]</sup>: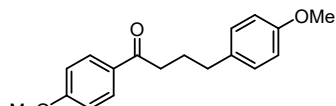

White solid, 106.6 mg, 75% yield. <sup>1</sup>H NMR (500 MHz, CDCl<sub>3</sub>) δ 7.90 (d, *J* = 8.6 Hz, 2H), 7.11 (d, *J* = 8.0 Hz, 2H), 6.90 (d, *J* = 8.6 Hz, 2H), 6.82 (d, *J* = 8.1 Hz, 2H), 3.85 (s, 3H), 3.78 (s, 3H), 2.90 (t, *J* = 7.2 Hz, 2H), 2.65 (t, *J* = 7.4 Hz, 2H), 2.06 – 2.01 (m, 1H). <sup>13</sup>C NMR (126 MHz, CDCl<sub>3</sub>) δ 198.8, 163.4, 157.9, 133.9, 130.3, 130.2, 129.4, 113.8, 113.7, 55.5, 55.3, 37.3, 34.4, 26.2.

**4-(4-Bromophenyl)-1-(4-methoxyphenyl)butan-1-one (3ag):**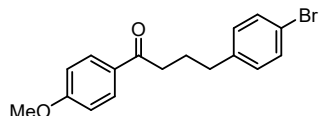

Pale yellow solid, 116.6 mg, 70% yield. <sup>1</sup>H NMR (500 MHz, CDCl<sub>3</sub>) δ



7.90 (d,  $J = 8.6$  Hz, 2H), 7.40 (d,  $J = 8.4$  Hz, 2H), 7.07 (d,  $J = 8.4$  Hz, 2H), 6.92 (d,  $J = 8.8$  Hz, 2H), 3.86 (s, 3H), 2.91 (t,  $J = 7.2$  Hz, 2H), 2.66 (t,  $J = 7.6$  Hz, 2H), 2.07 – 2.01 (m, 2H).  $^{13}\text{C}$  NMR (126 MHz,  $\text{CDCl}_3$ )  $\delta$  198.4, 163.4, 140.8, 131.4, 130.3, 130.3, 130.0, 119.7, 113.7, 55.5, 37.1, 34.6, 25.7. HRMS-ESI  $m/z$ :  $[\text{M}+\text{H}]^+$  calculated for  $\text{C}_{17}\text{H}_{18}\text{BrO}_2$ : 333.0485, found: 333.0472.

**4-(4-Chlorophenyl)-1-(4-methoxyphenyl)butan-1-one (3ah):**

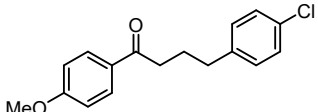 Pale yellow solid, 98.2 mg, 68% yield.  $^1\text{H}$  NMR (500 MHz,  $\text{CDCl}_3$ )  $\delta$  7.90 (d,  $J = 9.0$  Hz, 2H), 7.24 (d,  $J = 8.4$  Hz, 2H), 7.13 (d,  $J = 8.4$  Hz, 2H), 6.92 (d,  $J = 9.0$  Hz, 2H), 3.86 (s, 3H), 2.91 (t,  $J = 7.2$  Hz, 2H), 2.68 (t,  $J = 7.6$  Hz, 2H), 2.07 – 2.01 (m, 2H).  $^{13}\text{C}$  NMR (126 MHz,  $\text{CDCl}_3$ )  $\delta$  198.4, 163.4, 140.2, 131.6, 130.3, 130.1, 129.9, 128.5, 113.7, 55.5, 37.1, 34.6, 25.8. HRMS-ESI  $m/z$ :  $[\text{M}+\text{H}]^+$  calculated for  $\text{C}_{17}\text{H}_{18}\text{ClO}_2$ : 289.0990, found: 289.0997.

**1-(4-Methoxyphenyl)-4-(4-(trifluoromethyl)phenyl)butan-1-one (3ai):**

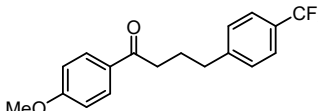 Pale yellow solid, 98.3 mg, 61% yield.  $^1\text{H}$  NMR (500 MHz,  $\text{CDCl}_3$ )  $\delta$  7.90 (d,  $J = 9.0$  Hz, 2H), 7.53 (d,  $J = 8.0$  Hz, 2H), 7.31 (d,  $J = 8.0$  Hz, 2H), 6.92 (d,  $J = 8.8$  Hz, 2H), 3.86 (s, 3H), 2.93 (t,  $J = 7.2$  Hz, 2H), 2.76 (t,  $J = 7.6$  Hz, 2H), 2.11 – 2.05 (m, 2H).  $^{13}\text{C}$  NMR (126 MHz,  $\text{CDCl}_3$ )  $\delta$  198.3, 163.5, 146.0, 130.2, 130.0, 128.8, 128.4, 128.2, 125.4, 125.3, 125.3, 125.3, 125.2, 123.3, 113.7, 55.5, 37.1, 35.1, 25.5. HRMS-ESI  $m/z$ :  $[\text{M}+\text{H}]^+$  calculated for  $\text{C}_{18}\text{H}_{18}\text{F}_3\text{O}_2$ : 323.1253, found: 323.1261.

**4. Procedures for Synthesis of Quinolones**

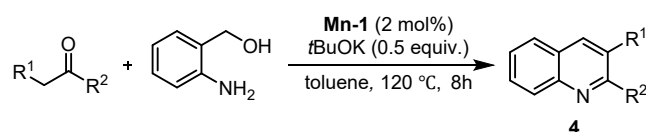

A flame dried Schlenk tube was charged with **Mn-1** (0.01 mmol), *t*BuOK (0.25 mmol), ketone (0.5 mmol) and 2-aminobenzyl alcohol (0.5 mmol). The tube was evacuated and backfilled with nitrogen for three times. Toluene (1 mL) was added and the mixture was stirred at 120 °C for 8 h. After completion of the reaction, the reaction mixture was cooled to ambient temperature and 5 mL of water was added and the aqueous solution extracted with EtOAc (3 × 5 mL). Combined organic layers were washed with saturated brine, dried over anhydrous  $\text{Na}_2\text{SO}_4$  and concentrated under reduced pressure. The crude product was then purified by silica gel column chromatography (*n*-hexane/EtOAc = 10:1) to give the corresponding product **4**.

**2-(4-Bromophenyl)quinolone (4a) [2]:**

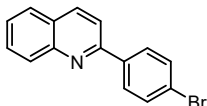 White solid, 119.4 mg, 84% yield.  $^1\text{H}$  NMR (500 MHz,  $\text{CDCl}_3$ )  $\delta$  8.12 (d,  $J = 8.6$  Hz, 1H), 8.07 (d,  $J = 8.5$  Hz, 1H), 7.96 (d,  $J = 8.6$  Hz, 2H), 7.74 (dd,  $J = 8.0$ , 3.4 Hz, 2H), 7.66 (ddd,  $J = 8.4$ , 6.9, 1.4 Hz, 1H), 7.656 (d,  $J = 8.6$  Hz, 2H), 7.45 (t,  $J = 7.5$  Hz, 1H).  $^{13}\text{C}$  NMR (126 MHz,  $\text{CDCl}_3$ )  $\delta$  156.0, 148.2, 138.5, 137.0, 132.0, 129.9, 129.7, 129.1, 128.5, 127.5, 126.5, 124.0, 118.5.

**2-(4-Chlorophenyl)quinolone (4b) [2]:**

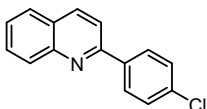 White solid, 97.1 mg, 81% yield.  $^1\text{H}$  NMR (500 MHz,  $\text{CDCl}_3$ )  $\delta$  8.19 (d,  $J = 8.6$  Hz, 1H), 8.15 (d,  $J = 8.5$  Hz, 1H), 8.11 (d,  $J = 7.0$  Hz, 2H), 7.84 (d,  $J = 8.6$  Hz,

2H), 7.74 (t,  $J = 7.7$  Hz, 1H), 7.54 (t,  $J = 7.5$  Hz, 1H), 7.48 (d,  $J = 8.6$  Hz, 2H).  $^{13}\text{C}$  NMR (126 MHz,  $\text{CDCl}_3$ )  $\delta$  156.0, 148.3, 138.1, 137.6, 135.6, 129.8, 129.7, 129.0, 128.8, 127.5, 127.2, 126.5, 118.5.

***N,N*-Dimethyl-4-(quinolin-2-yl)aniline (4c)** <sup>[14]</sup>:

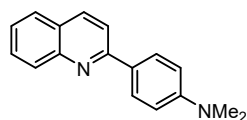

Yellow solid, 84.4 mg, 68% yield.  $^1\text{H}$  NMR (500 MHz,  $\text{CDCl}_3$ )  $\delta$  8.11 (d,  $J = 9.0$  Hz, 3H), 7.82 (d,  $J = 8.7$  Hz, 1H), 7.76 (d,  $J = 8.0$  Hz, 1H), 7.67 (ddd,  $J = 8.4, 6.9, 1.4$  Hz, 1H), 7.47 – 7.42 (m, 1H), 6.83 (d,  $J = 8.9$  Hz, 2H), 6.73 (d,  $J = 9.0$  Hz, 1H), 3.04 (s, 6H).  $^{13}\text{C}$  NMR (126 MHz,  $\text{CDCl}_3$ )  $\delta$  157.4, 151.4, 148.4, 136.3, 129.3, 128.5, 127.4, 127.3, 127.1, 126.7, 125.3, 118.3, 112.3, 40.4.

**2-(3-Methoxyphenyl)quinolone (4d)** <sup>[5]</sup>:

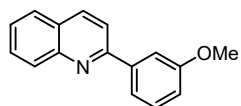

White solid, 77.6 mg, 66% yield.  $^1\text{H}$  NMR (500 MHz,  $\text{CDCl}_3$ )  $\delta$  8.20 – 8.17 (m, 2H), 7.85 (d,  $J = 8.6$  Hz, 1H), 7.81 (d,  $J = 8.0$  Hz, 1H), 7.77 (t,  $J = 2.0$  Hz, 1H), 7.73 – 7.69 (m, 2H), 7.52 (t,  $J = 7.5$  Hz, 1H), 7.42 (t,  $J = 7.9$  Hz, 1H), 7.02 (m, 1H), 3.93 (s, 3H).  $^{13}\text{C}$  NMR (126 MHz,  $\text{CDCl}_3$ )  $\delta$  160.1, 157.1, 148.2, 141.2, 136.7, 129.8, 129.8, 129.6, 127.5, 127.3, 126.3, 120.0, 119.1, 115.4, 112.7, 55.4.

**2-(2-Methoxyphenyl)quinolone (4e)** <sup>[5]</sup>:

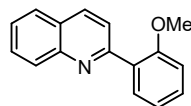

Pale yellow oil, 67.1 mg, 57% yield.  $^1\text{H}$  NMR (500 MHz,  $\text{CDCl}_3$ )  $\delta$  8.17 (d,  $J = 8.5$  Hz, 1H), 8.13 (d,  $J = 7.8$  Hz, 1H), 7.88 (d,  $J = 8.6$  Hz, 1H), 7.85 (dd,  $J = 7.5, 1.8$  Hz, 1H), 7.82 (d,  $J = 8.2$  Hz, 1H), 7.70 (ddd,  $J = 8.4, 6.9, 1.5$  Hz, 1H), 7.52 (ddd,  $J = 8.2, 6.9, 1.2$  Hz, 1H), 7.41 (ddd,  $J = 8.4, 7.4, 1.8$  Hz, 1H), 7.13 (t,  $J = 6.9$  Hz, 1H), 7.03 (d,  $J = 8.6$  Hz, 1H), 3.85 (s, 3H).  $^{13}\text{C}$  NMR (126 MHz,  $\text{CDCl}_3$ )  $\delta$  157.2, 157.1, 148.3, 135.1, 131.5, 130.3, 129.8, 129.7, 129.2, 127.4, 127.1, 126.2, 123.5, 121.3, 111.5, 55.7.

**2-(Naphthalen-2-yl)quinolone (4f)** <sup>[3]</sup>:

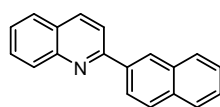

White solid, 102.1 mg, 80% yield.  $^1\text{H}$  NMR (500 MHz,  $\text{CDCl}_3$ )  $\delta$  8.60 (s, 1H), 8.37 (dd,  $J = 8.5, 1.5$  Hz, 1H), 8.22 (d,  $J = 8.5$  Hz, 2H), 8.00 (m, 3 H), 7.88 (dd,  $J = 6.0, 3.0$  Hz, 1H), 7.82 (d,  $J = 8.5$  Hz, 1H), 7.74 (t,  $J = 7.5$  Hz, 1H), 7.52 (m, 3H).  $^{13}\text{C}$  NMR (126 MHz,  $\text{CDCl}_3$ )  $\delta$  157.2, 148.3, 136.9, 136.7, 133.9, 133.5, 129.8, 129.7, 128.8, 128.6, 127.7, 127.5, 127.2, 127.2, 126.7, 126.4, 126.3, 125.1, 119.2.

**2-(Thiophen-2-yl)quinolone (4g)** <sup>[2]</sup>:

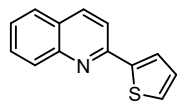

White solid, 75 mg, 71% yield.  $^1\text{H}$  NMR (500 MHz,  $\text{CDCl}_3$ )  $\delta$  8.12 – 8.07 (m, 2H), 7.78 – 7.67 (m, 4H), 7.49 – 7.45 (m, 2H), 7.14 (dd,  $J = 5.0, 3.7$  Hz, 1H).  $^{13}\text{C}$  NMR (126 MHz,  $\text{CDCl}_3$ )  $\delta$  152.4, 148.1, 145.4, 136.6, 129.8, 129.3, 128.6, 128.1, 127.5, 127.2, 126.1, 125.9, 117.7.

**2-(Pyridin-3-yl)quinolone (4h)** <sup>[3]</sup>:

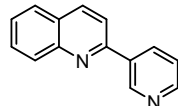

Pale yellow solid, 80.4 mg, 78% yield.  $^1\text{H}$  NMR (500 MHz,  $\text{CDCl}_3$ )  $\delta$  9.36 (s, 1H), 8.70 (d,  $J = 4.5$  Hz, 1H), 8.51 (d,  $J = 8.0$  Hz, 1H), 8.26 (d,  $J = 8.5$  Hz, 1H), 8.17 (d,  $J = 8.5$  Hz, 1H), 7.88 (d,  $J = 9.0$  Hz, 1H), 7.84 (d,  $J = 8.5$  Hz, 1H), 7.75 (t,  $J = 7.5$  Hz, 1H), 7.56 (t,  $J = 7.5$  Hz, 1H), 7.45 (dd,  $J = 8.0, 5.0$  Hz, 1H).  $^{13}\text{C}$  NMR (126 MHz,  $\text{CDCl}_3$ )  $\delta$  154.6, 150.2, 148.8, 148.4, 137.2, 135.1, 134.9, 130.0, 129.8, 127.6, 127.4, 126.8, 123.7, 118.5.

**11*H*-Indeno[1,2-*b*]quinoline (4i)** <sup>[16]</sup>:

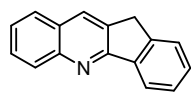

Pale yellow solid, 65.2 mg, 60% yield.  $^1\text{H}$  NMR (500 MHz,  $\text{CDCl}_3$ )  $\delta$  8.30 – 8.26 (m, 1H), 8.18 (d,  $J = 8.4$  Hz, 1H), 8.15 (s, 1H), 7.79 (d,  $J = 8.0$  Hz, 1H), 7.68 (ddd,  $J = 8.4, 6.8, 1.5$  Hz, 1H), 7.58 (m, 1H), 7.51 – 7.47 (m, 3H), 4.00 (s, 2H).  $^{13}\text{C}$  NMR

(126 MHz, CDCl<sub>3</sub>)  $\delta$  161.7, 148.0, 145.1, 140.3, 134.6, 131.1, 130.0, 129.1, 128.8, 127.8, 127.5, 127.4, 125.7, 125.4, 122.1, 34.0.

## 5. X-Ray Crystallographic Data of Mn-1

**Figure S2.** X-Ray Structure of **Mn-1** (CCDC 2082641).

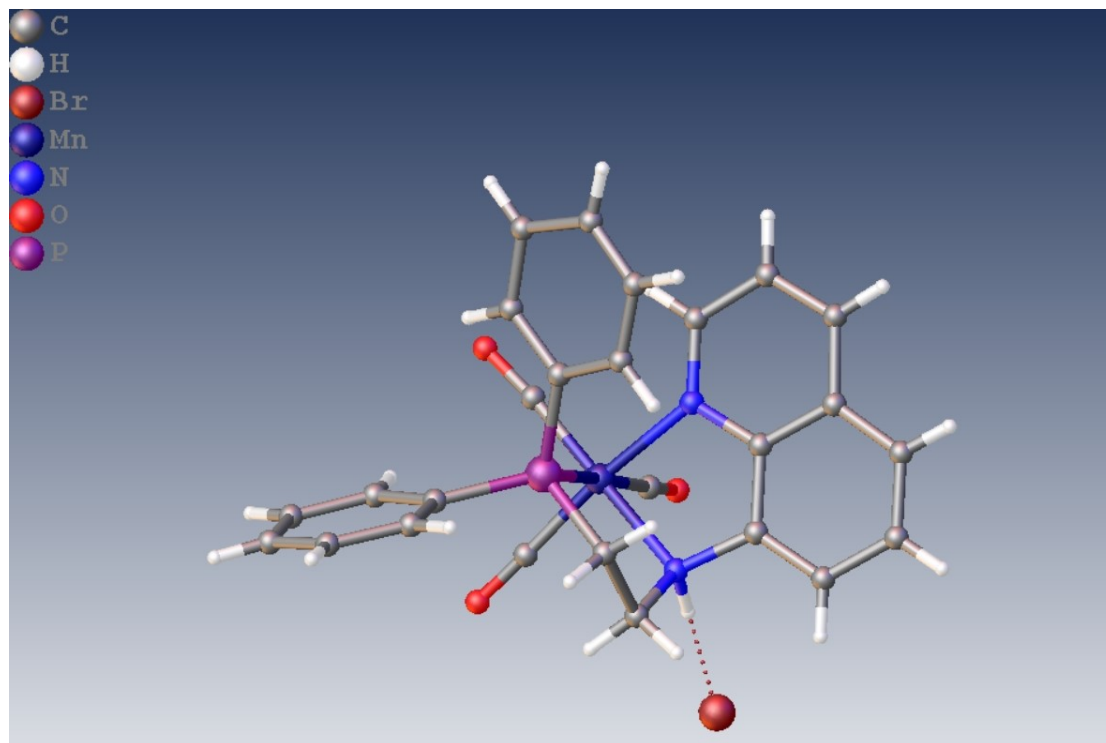

**Table S1.** Crystal data and structure refinement for **Mn-1**.

|                                  |                                                                     |
|----------------------------------|---------------------------------------------------------------------|
| Identification code              | SPD                                                                 |
| Empirical formula                | C <sub>26</sub> H <sub>21</sub> BrMnN <sub>2</sub> O <sub>3</sub> P |
| Formula weight                   | 575.27                                                              |
| Temperature/K                    | 303.0                                                               |
| Crystal system                   | monoclinic                                                          |
| Space group                      | P2 <sub>1</sub> /c                                                  |
| a/Å                              | 11.1364(4)                                                          |
| b/Å                              | 20.0961(7)                                                          |
| c/Å                              | 15.2761(5)                                                          |
| $\alpha$ /°                      | 90                                                                  |
| $\beta$ /°                       | 93.171(2)                                                           |
| $\gamma$ /°                      | 90                                                                  |
| Volume/Å <sup>3</sup>            | 3413.5(2)                                                           |
| Z                                | 4                                                                   |
| $\rho_{\text{calc}}/\text{cm}^3$ | 1.119                                                               |
| $\mu/\text{mm}^{-1}$             | 5.143                                                               |
| F(000)                           | 1160.0                                                              |
| Crystal size/mm <sup>3</sup>     | 0.30 × 0.28 × 0.26                                                  |

|                                                  |                                                               |
|--------------------------------------------------|---------------------------------------------------------------|
| Radiation                                        | CuK $\alpha$ ( $\lambda = 1.54178$ )                          |
| 2 $\Theta$ range for data collection/ $^{\circ}$ | 7.95 to 136.912                                               |
| Index ranges                                     | $-13 \leq h \leq 13, -24 \leq k \leq 12, -16 \leq l \leq 18$  |
| Reflections collected                            | 21467                                                         |
| Independent reflections                          | 6205 [ $R_{\text{int}} = 0.0706, R_{\text{sigma}} = 0.0755$ ] |
| Data/restraints/parameters                       | 6205/7/307                                                    |
| Goodness-of-fit on $F^2$                         | 1.033                                                         |
| Final R indexes [ $I \geq 2\sigma(I)$ ]          | $R_1 = 0.0654, wR_2 = 0.2128$                                 |
| Final R indexes [all data]                       | $R_1 = 0.0914, wR_2 = 0.2343$                                 |
| Largest diff. peak/hole / $e \text{ \AA}^{-3}$   | 0.46/-0.51                                                    |

## 6. References

- [1] A. A. Mikhailine, E. Kim, C. Dingels, A. J. Lough, R. H. Morris, *Inorg. Chem.* 2008, **47**, 6587.
- [2] X. Lan, Z. Ye, M. Huang, Y. Liu, Z. Ke, *Org. Lett.*, 2019, **21**, 8065.
- [3] G. Zhang, J. Wu, H. Zeng, S. Zhang, Z. Yin, S. Zheng, *Org. Lett.*, 2017, **19**, 1080.
- [4] S. Elangovan, J.-B. Sortais, M. Beller, C. Darcel, *Angew. Chem., Int. Ed.*, 2015, **54**, 14483.
- [5] A. Maji, A. Singh, N. Singh and K. Ghosh, *ChemCatChem.*, 2020, **12**, 3108.
- [6] P. Colbon, J. Ruan, M. Purdie, J. Xiao, *Org. Lett.*, 2010, **12**, 3670.
- [7] L. Li, Z. Niu, Y. Liang, *Org. Biomol. Chem.*, 2018, **16**, 7792.
- [8] W. Li, X. Wu, *Eur. J. Org. Chem.*, 2015, **2**, 331.
- [9] P. Liu, R. Liang, L. Lu, Z. Yu, F. Li, *J. Org. Chem.*, 2017, **82**, 1943.
- [10] M. Vellakkaran, M. M. S. Andappan, N. Kommu, *Eur. J. Org. Chem.*, 2012, **25**, 4694.
- [11] G. Balamurugan, S. Balaji, R. Ramesh, N. S. P. Bhuvanesh, *Appl. Organomet. Chem.*, 2019, **33**, 4696.
- [12] M. Das, M. D. Vu, Q. Zhang, X. Liu, *Chem. Sci.*, 2019, **10**, 1687.
- [13] O. Vechorkin, X. Hu, *Angew. Chem., Int. Ed.*, 2009, **48**, 2937.
- [14] M. J. Iglesias, A. Prieto, M. C. Nicasio, *Org. Lett.*, 2012, **14**, 4318.
- [15] B. Hu, Y. Li, W. Dong, Z. Zhang, *RSC Adv.*, 2016, **6**, 48315.
- [16] L. Xi, R. Zhang, S. Chen, X. Yu, *Org. Biomol. Chem.*, 2015, **13**, 3924.
- [17] X. Wang, X. Wang, Z. Zhang, T. Wang, *J. Org. Chem.*, 2022, **87**, 10173.
- [18] B. Emayavaramban, P. Chakraborty, B. Sundararaju, *Org. Lett.*, 2022, **24**, 6219.
- [19] X. Wang, T. Pei, X. Han, R. A. Widenhoefer, *Org. Lett.*, 2003, **5**, 2699.
- [20] K. Nicholson, T. Langer, S. P. Thomas, *Org. Lett.*, 2021, **23**, 2498.

## 7. NMR Spectra

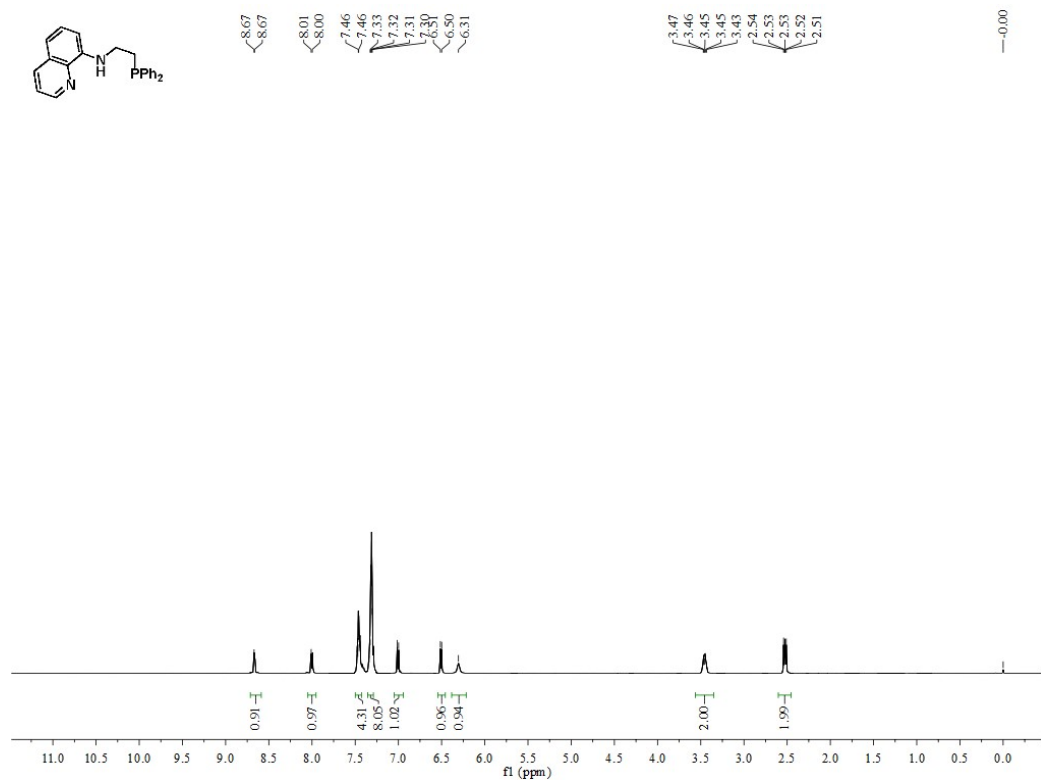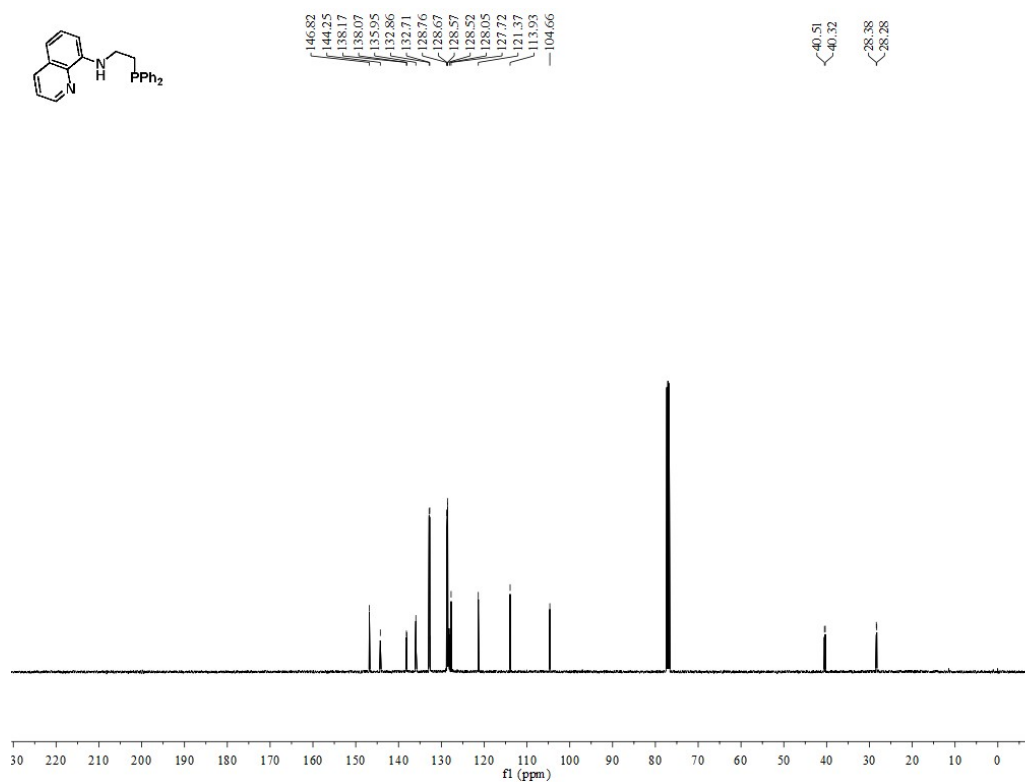

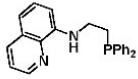

-21.01

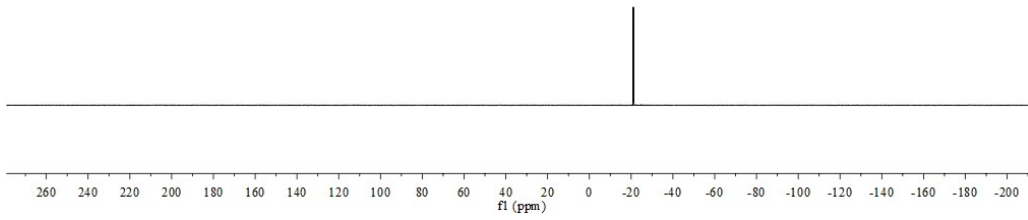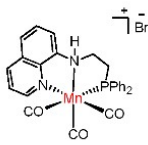

9.61, 8.63, 8.62, 8.60, 8.59, 8.32, 8.30, 8.13, 7.94, 7.92, 7.91, 7.65, 7.64, 7.37, 7.28, 7.26, 7.00, 6.98, 6.97, 4.16, 4.15, 4.14, 4.09, 4.08, 4.06, 4.05, 3.28, 3.23, 3.22, 3.19, 2.46, 1.75, 1.72, 1.70, 1.69, 1.68, 1.66, 1.65

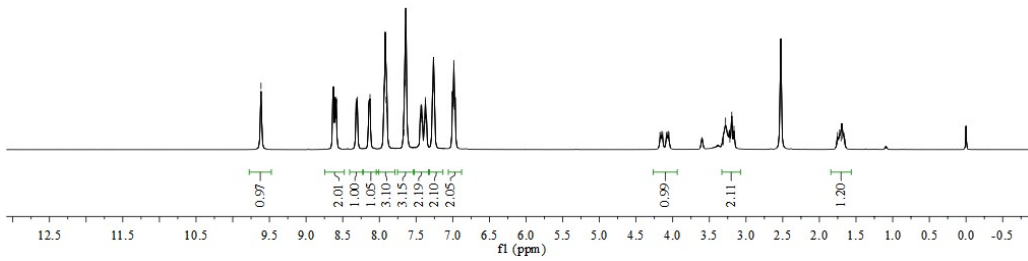

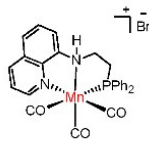

156.56  
146.15  
145.00  
139.20  
133.47  
132.39  
131.97  
131.41  
130.83  
130.98  
130.91  
130.00  
129.05  
128.87  
128.87  
128.47  
128.47  
128.27  
128.00  
128.18  
124.51  
57.12  
57.03  
20.72  
20.54

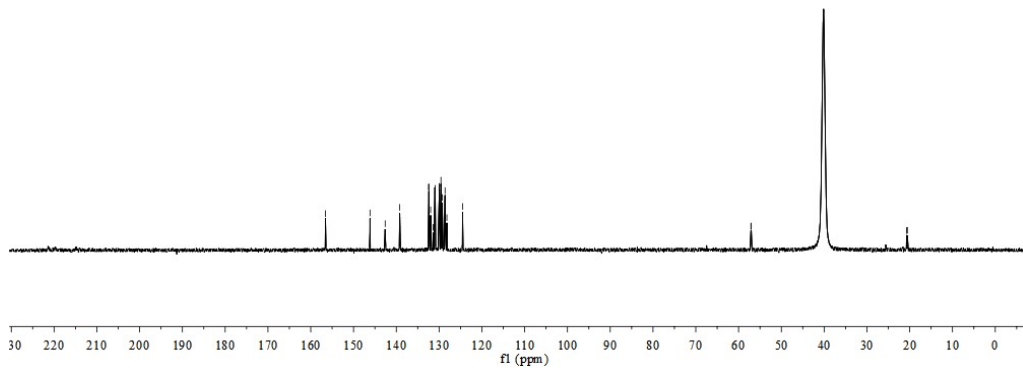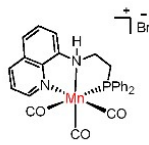

67.37

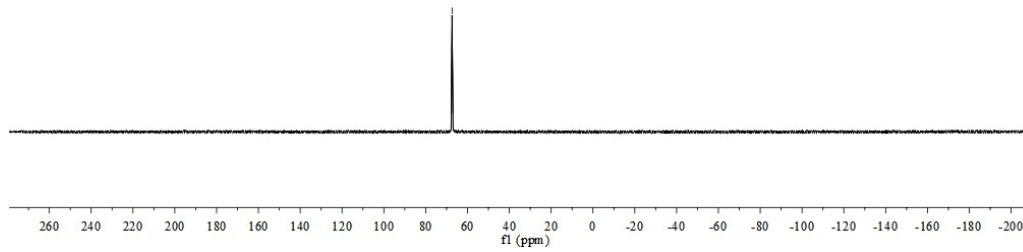



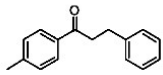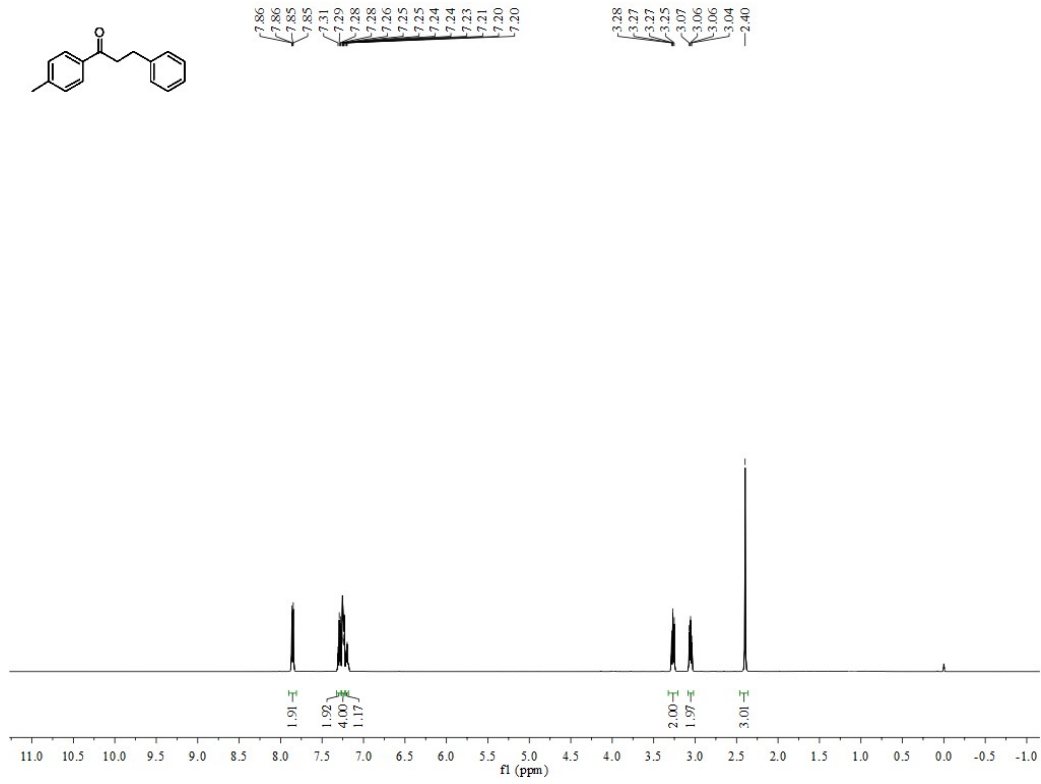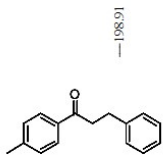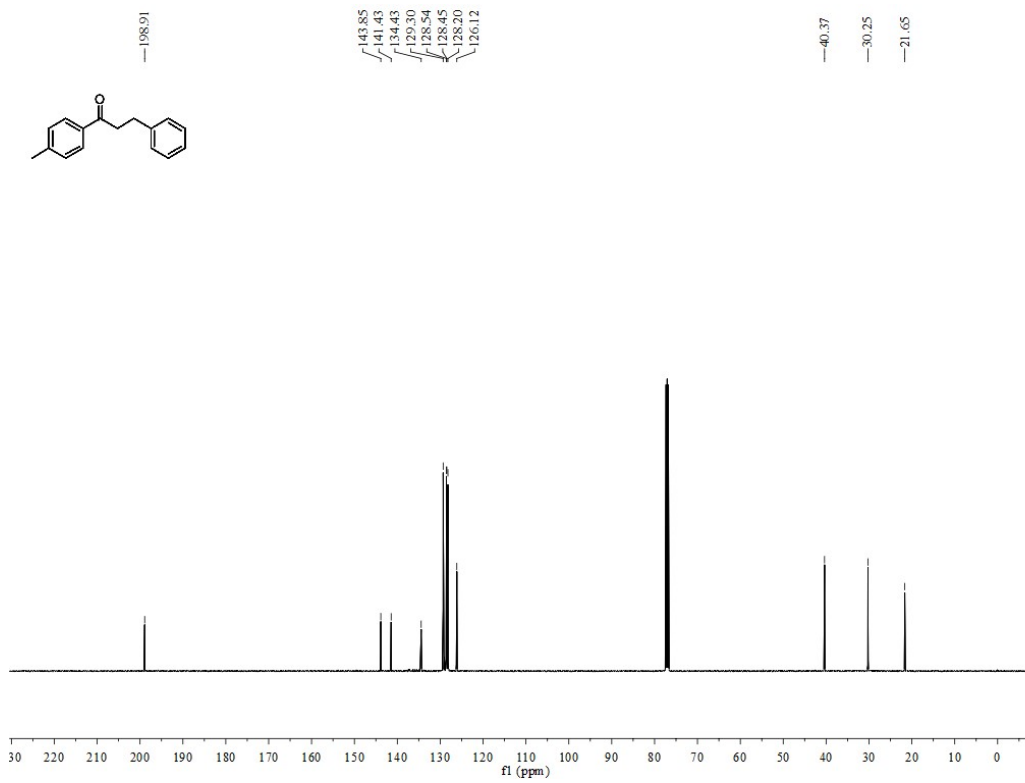

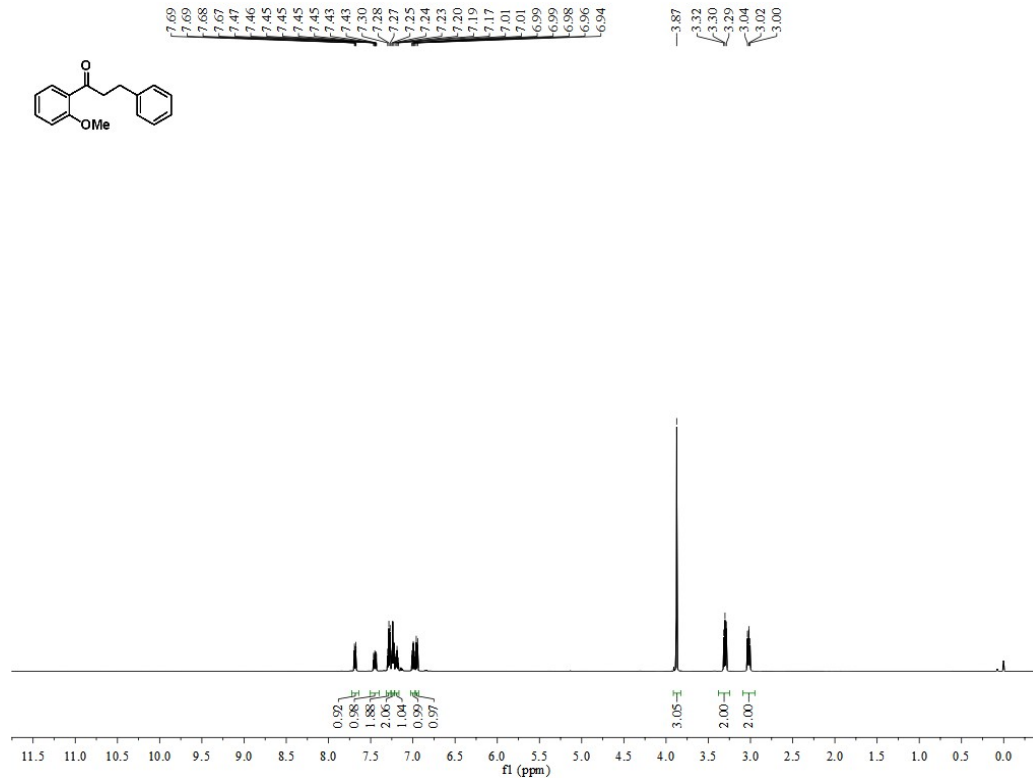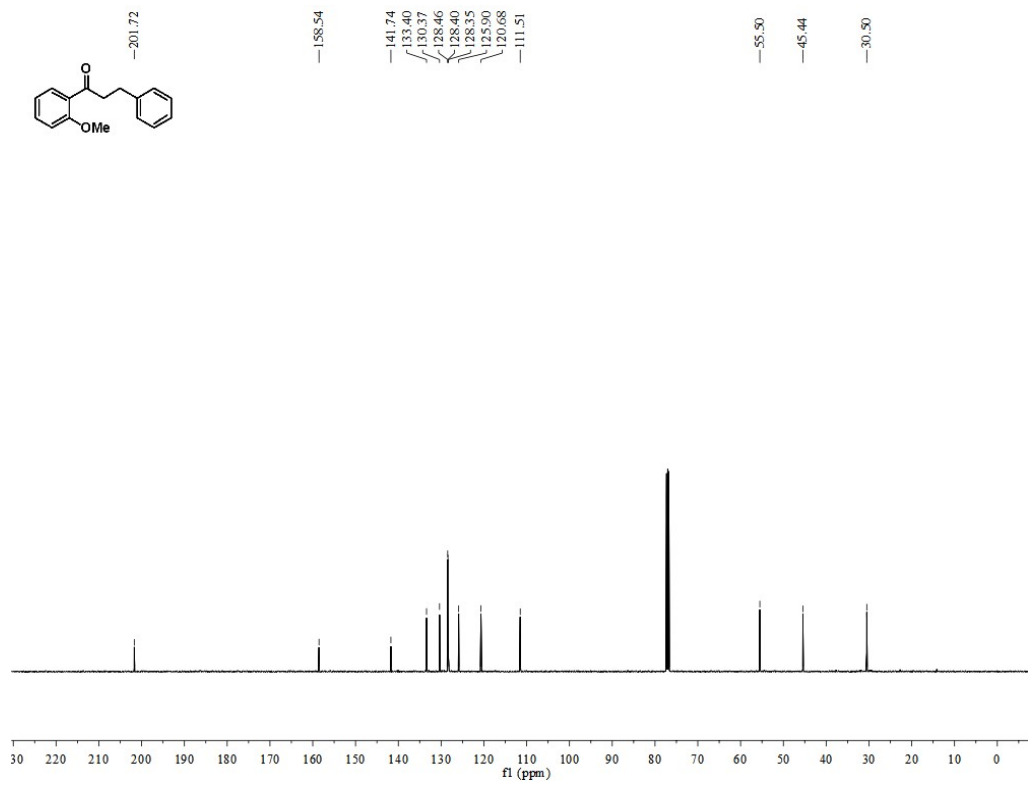

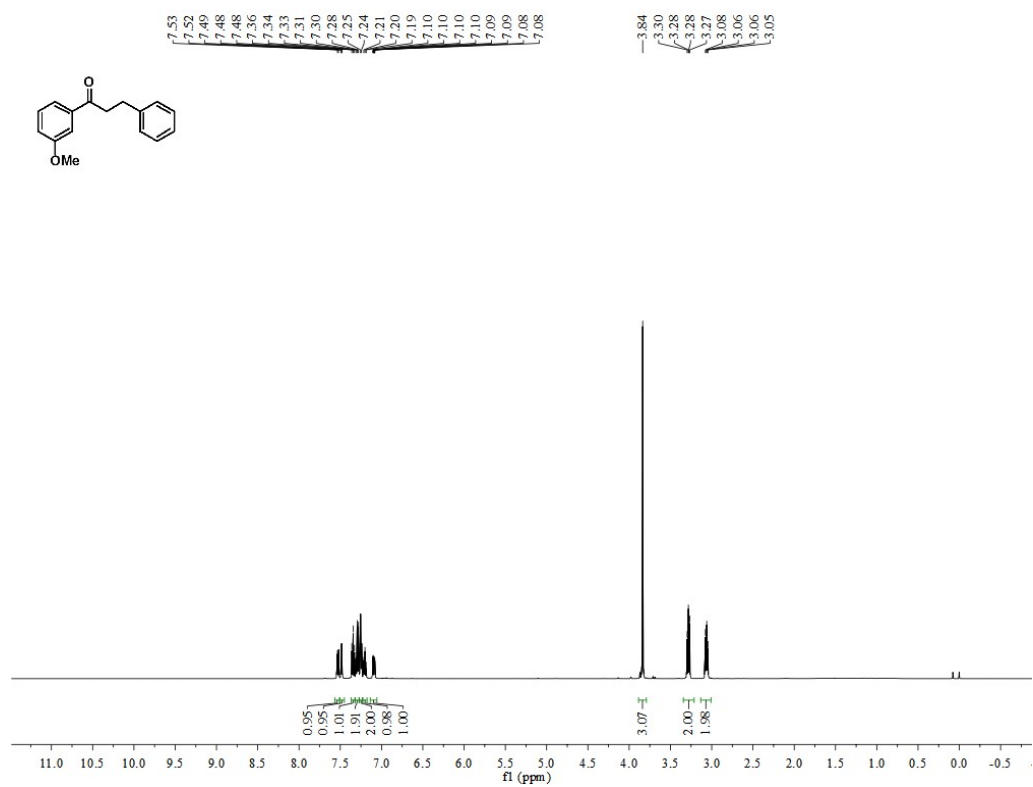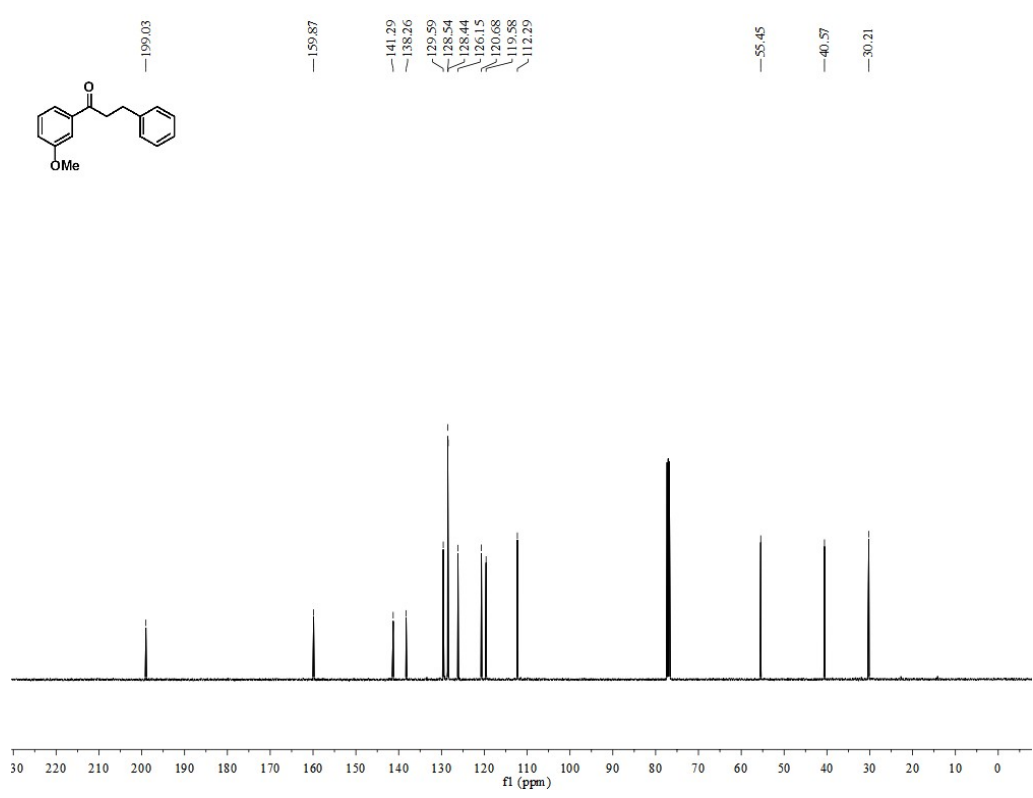

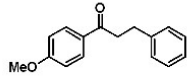

7.94  
7.92  
7.29  
7.27  
7.25  
7.24  
7.19  
6.92  
6.90

3.84  
3.25  
3.24  
3.22  
3.06  
3.05  
3.03

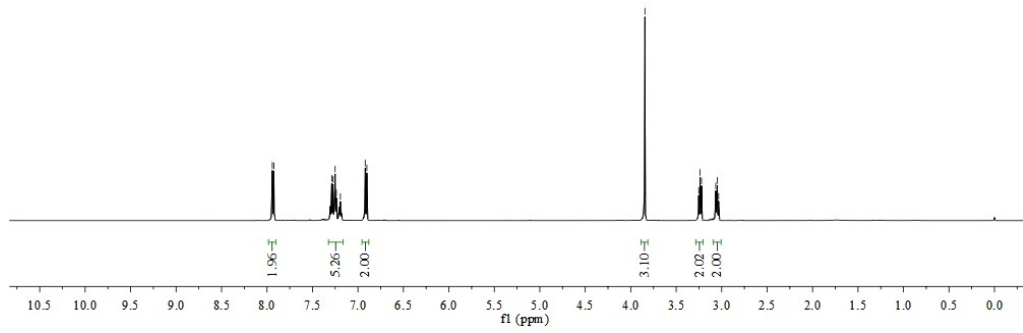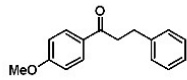

197.80

163.47

141.49

130.31

130.02

128.51

128.43

126.09

113.75

55.46

40.11

30.37

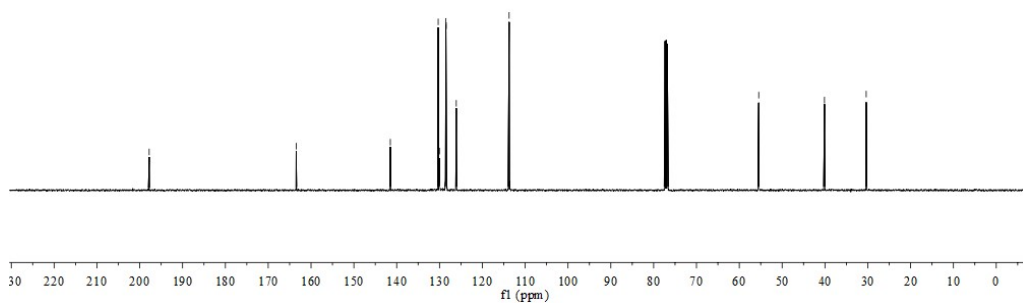

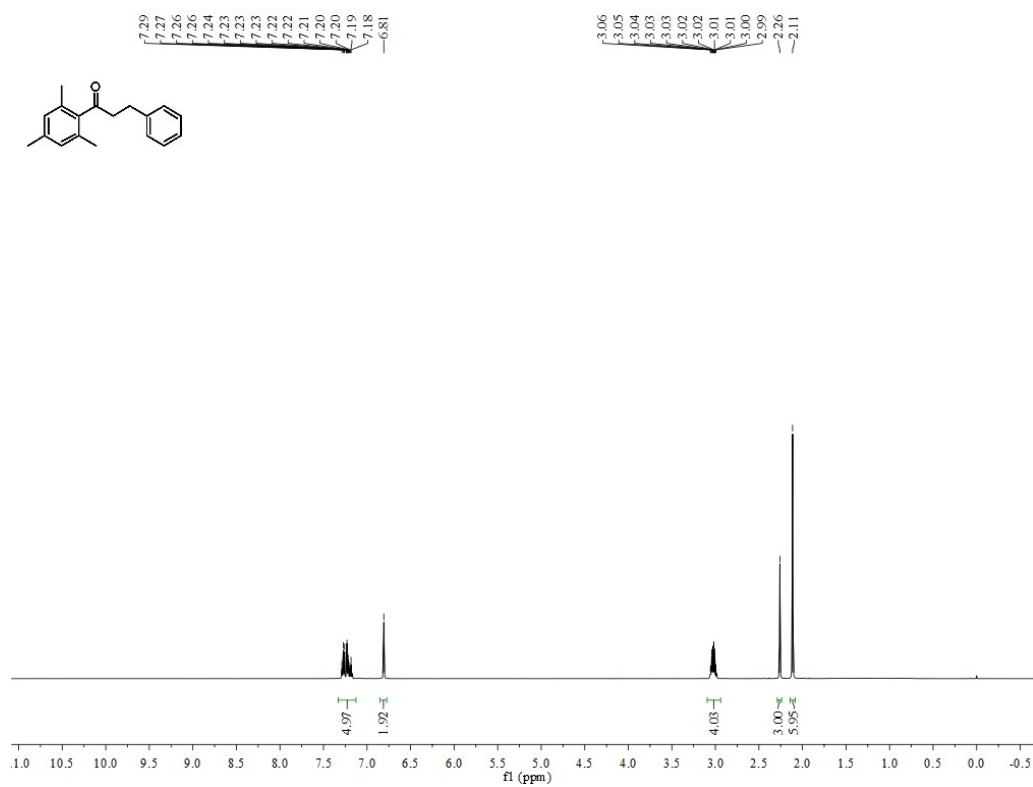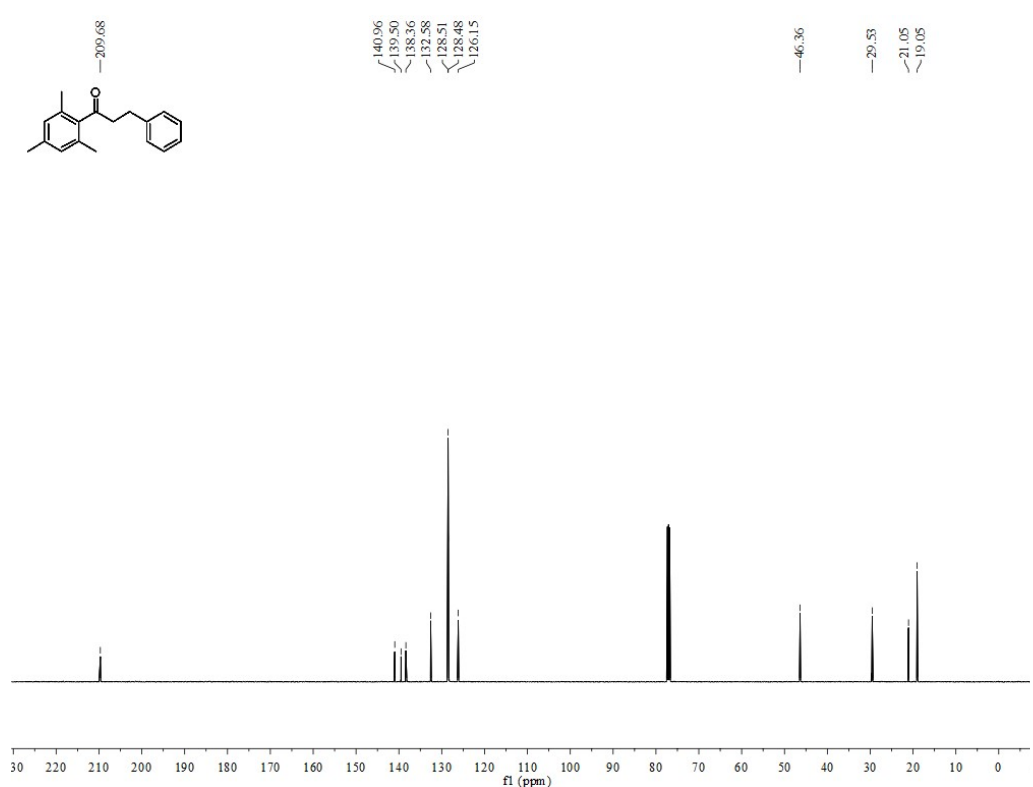

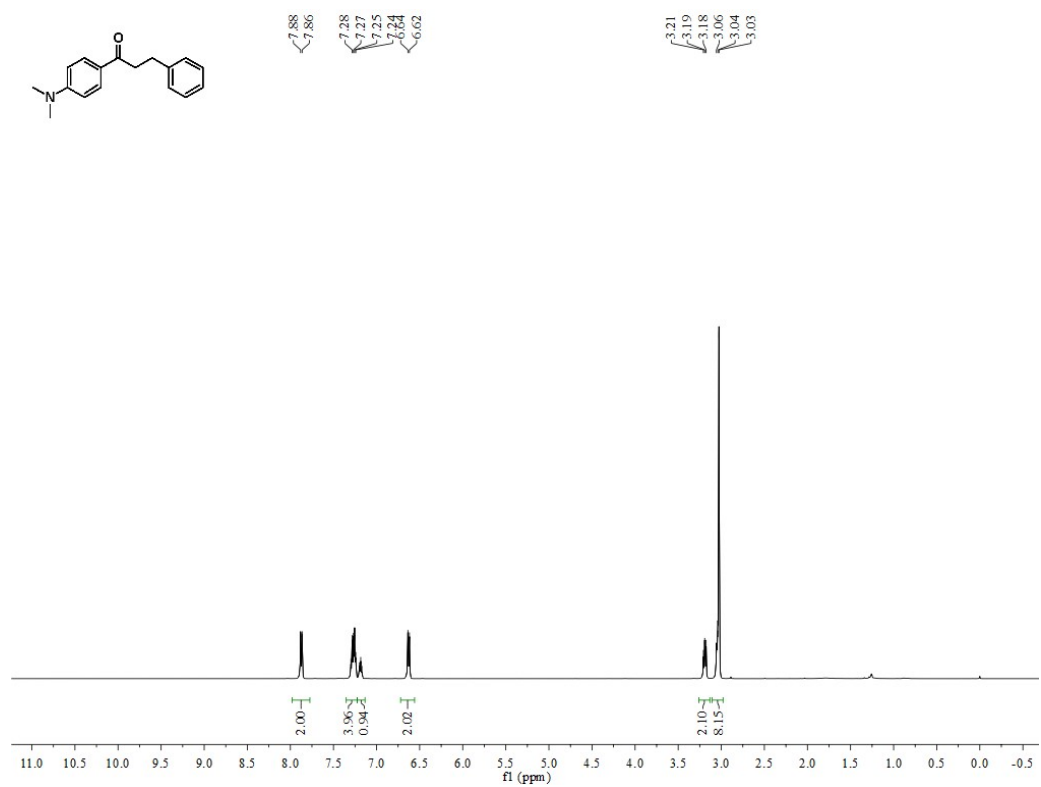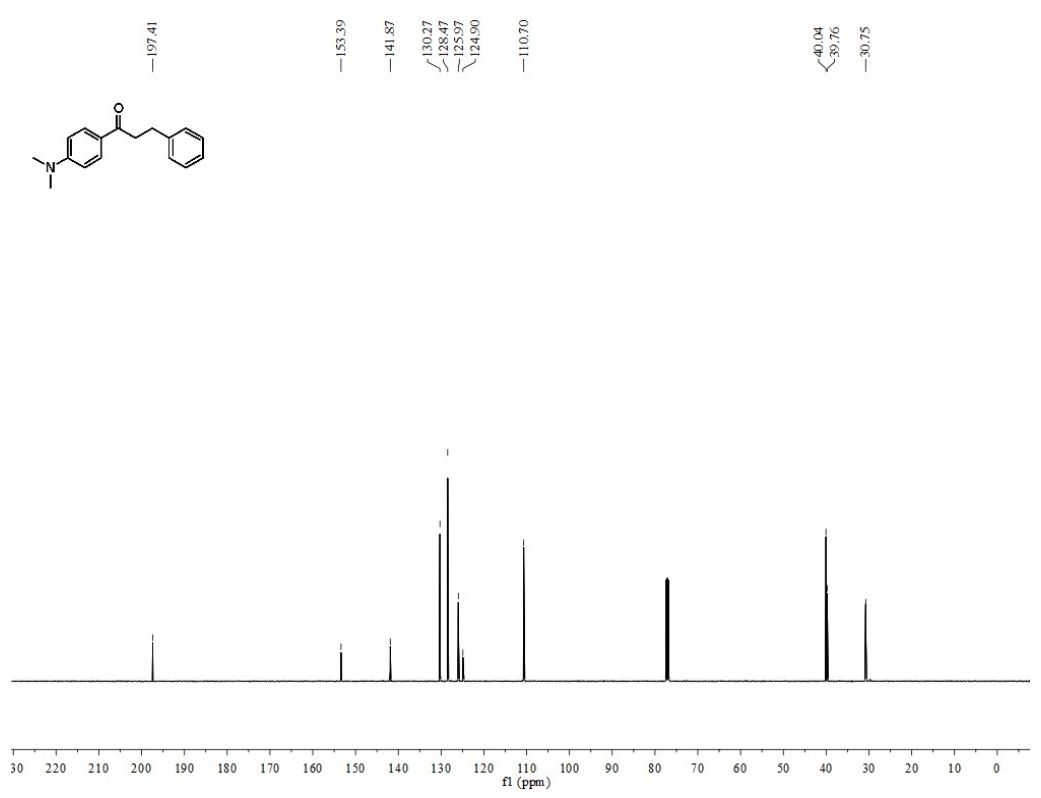

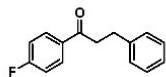

7.98  
7.97  
7.97  
7.95  
7.31  
7.29  
7.28  
7.25  
7.23  
7.21  
7.20  
7.19  
7.12  
7.10  
7.09

3.28  
3.26  
3.25  
3.07  
3.06  
3.04

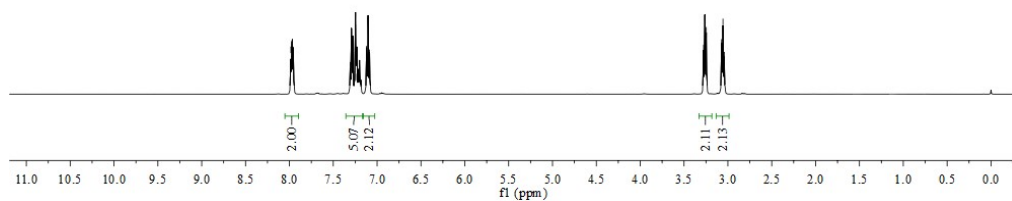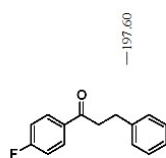

197.60

166.74

164.72

141.15

130.70

130.63

128.57

128.45

115.78

115.60

40.37

30.13

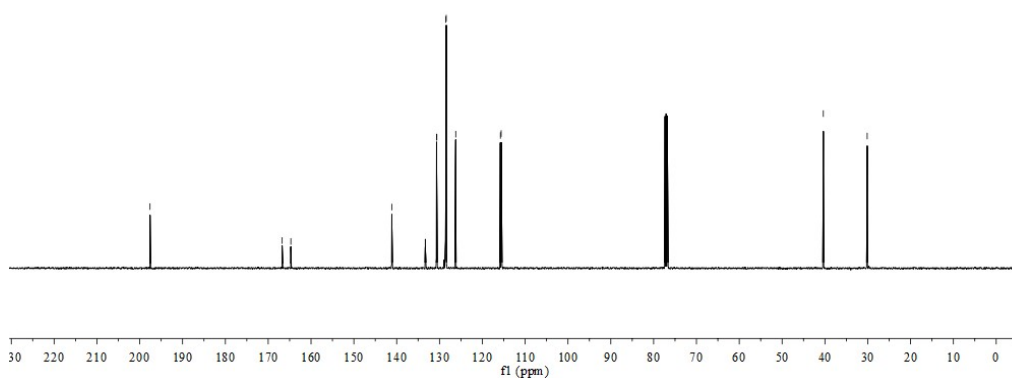

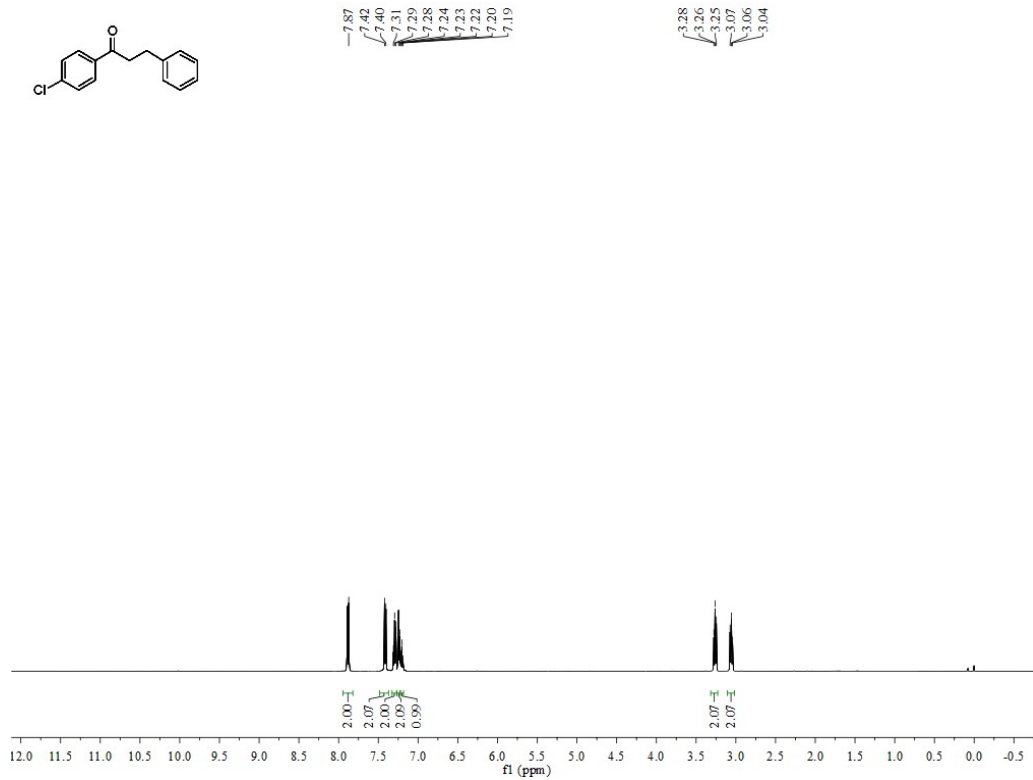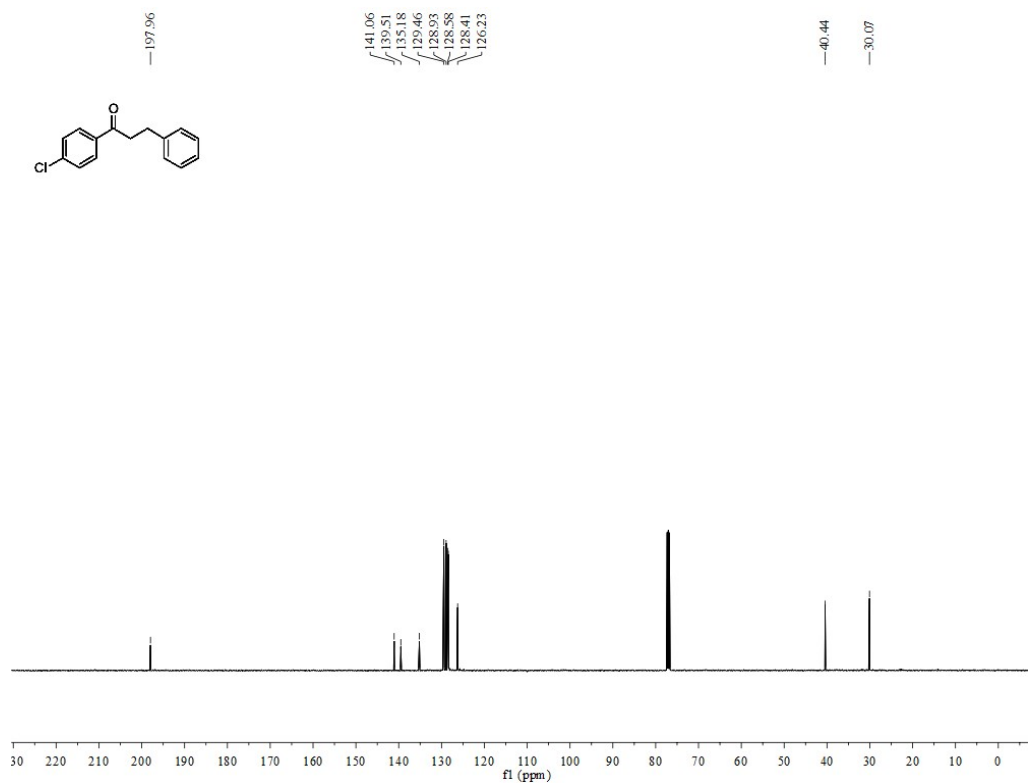



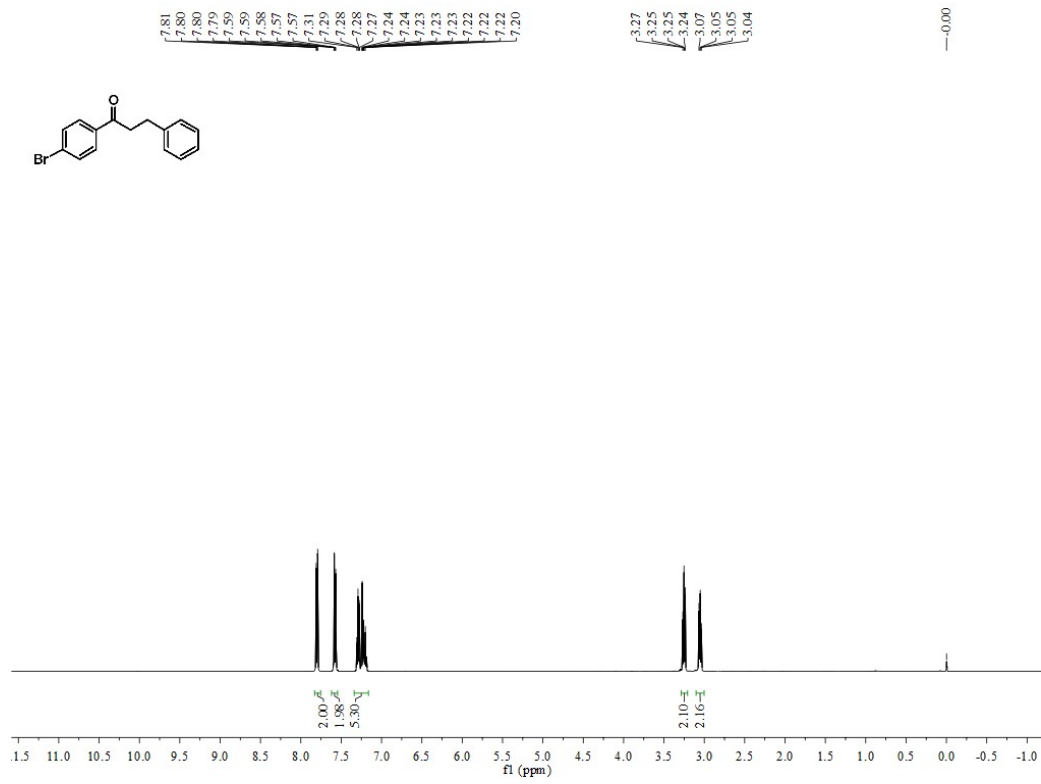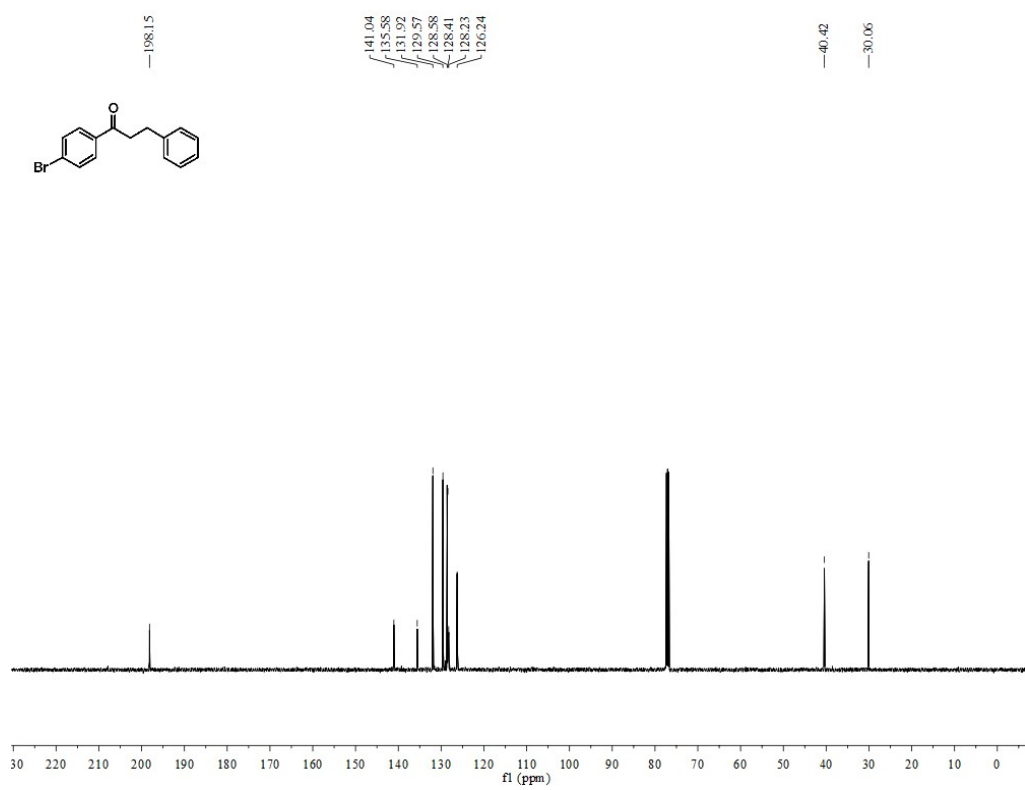

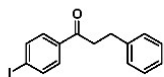

7.82  
7.82  
7.81  
7.80  
7.67  
7.66  
7.65  
7.31  
7.30  
7.28  
7.26  
7.24  
7.23  
7.21  
7.20

3.27  
3.25  
3.23  
3.07  
3.05  
3.04

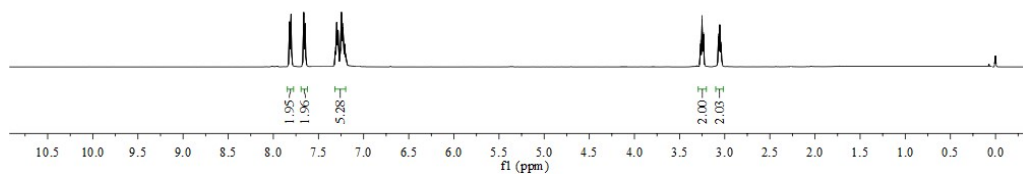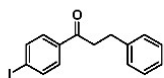

198.46

141.03  
137.93  
136.11  
129.45  
128.57  
128.40  
126.23

100.98

40.35

30.04

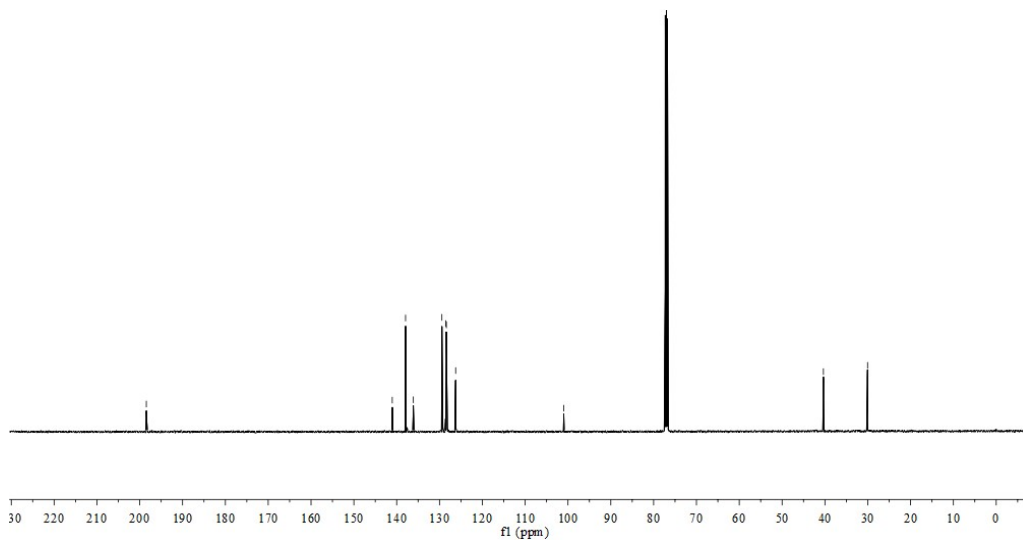

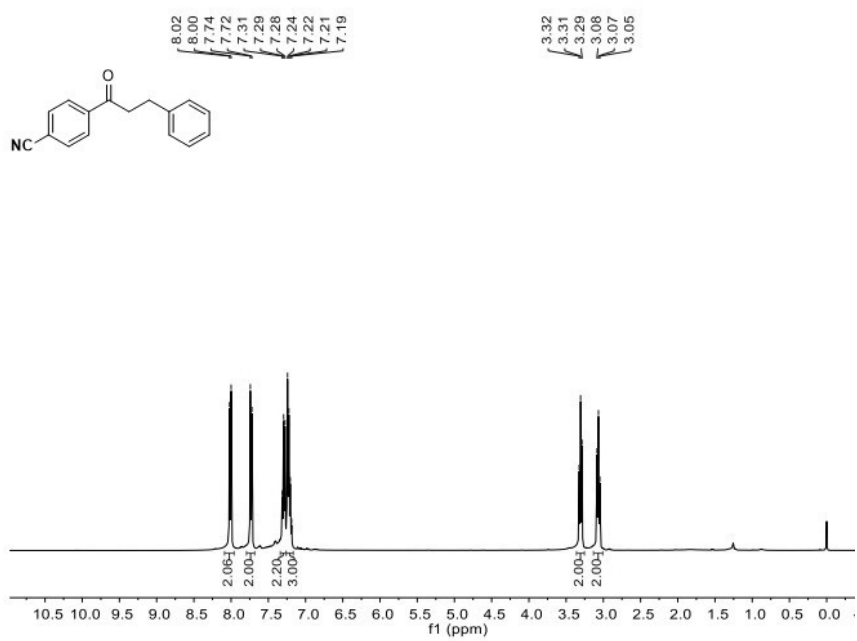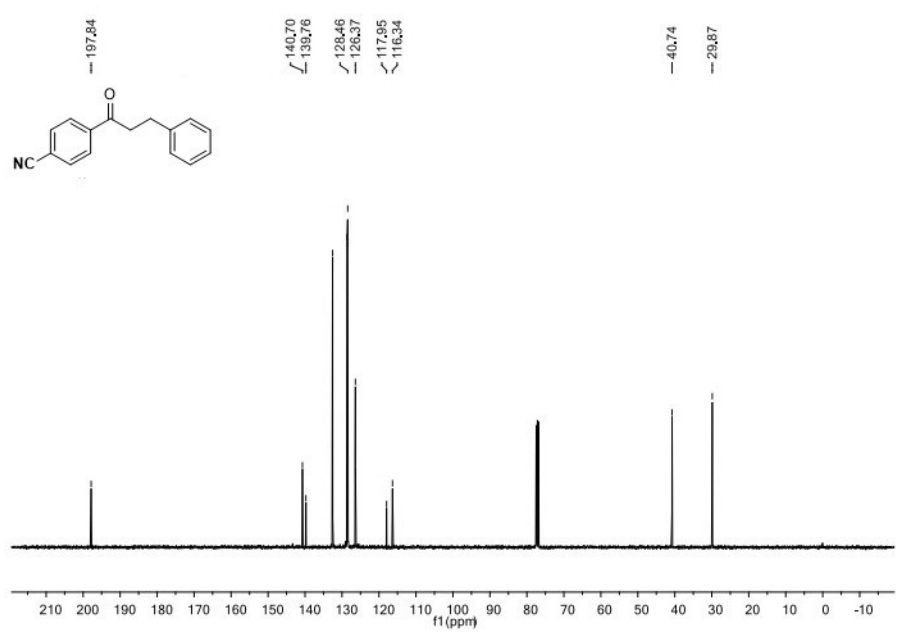

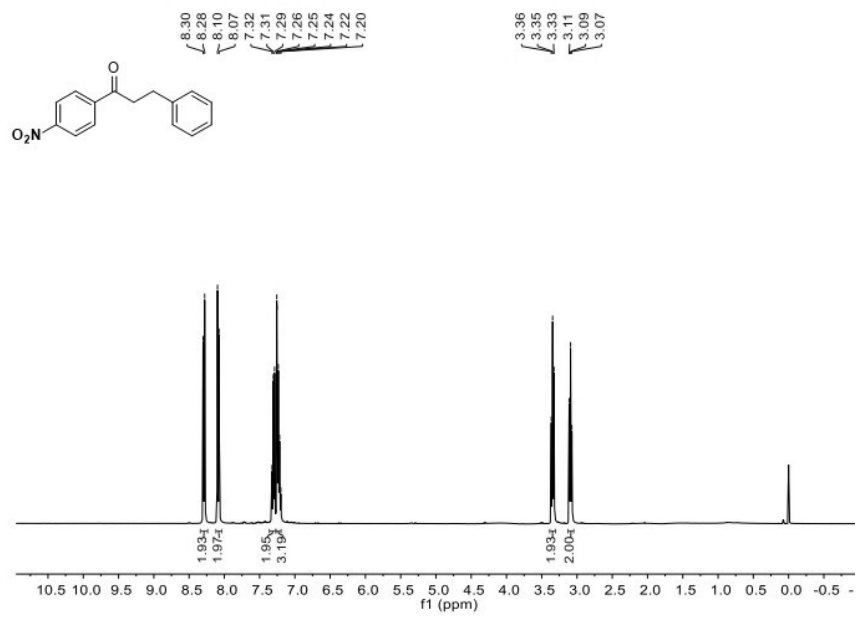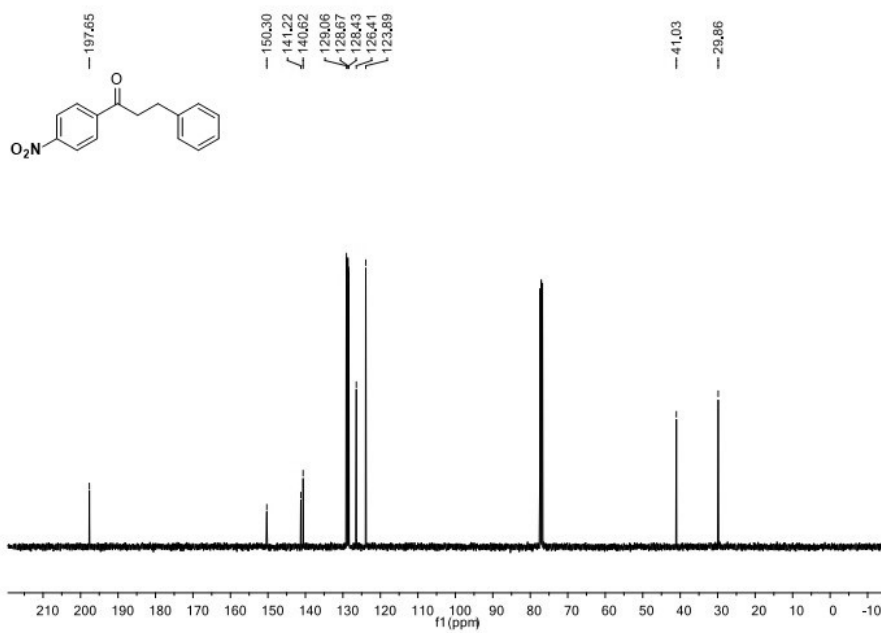

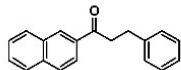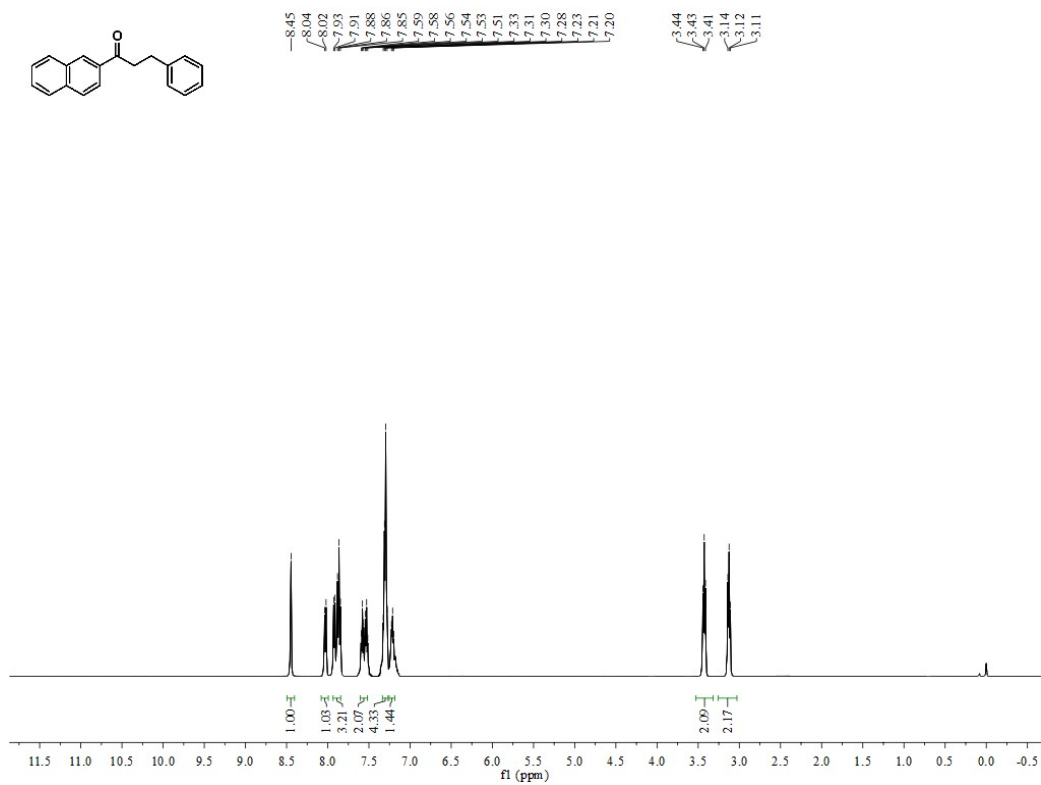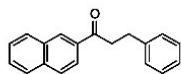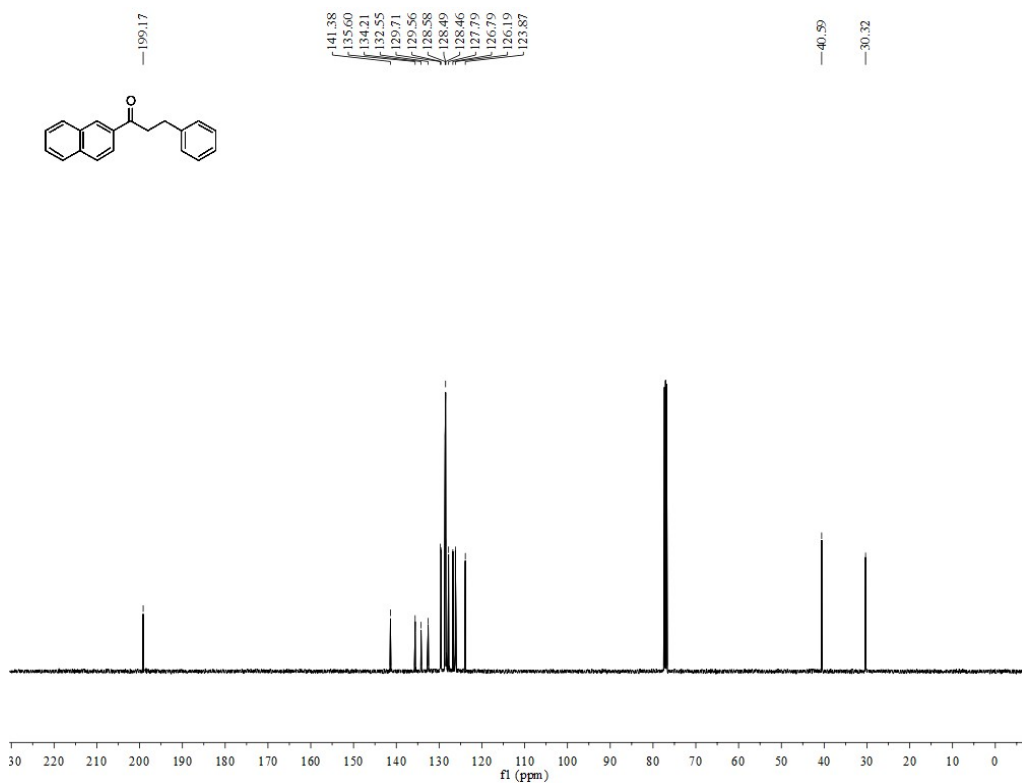

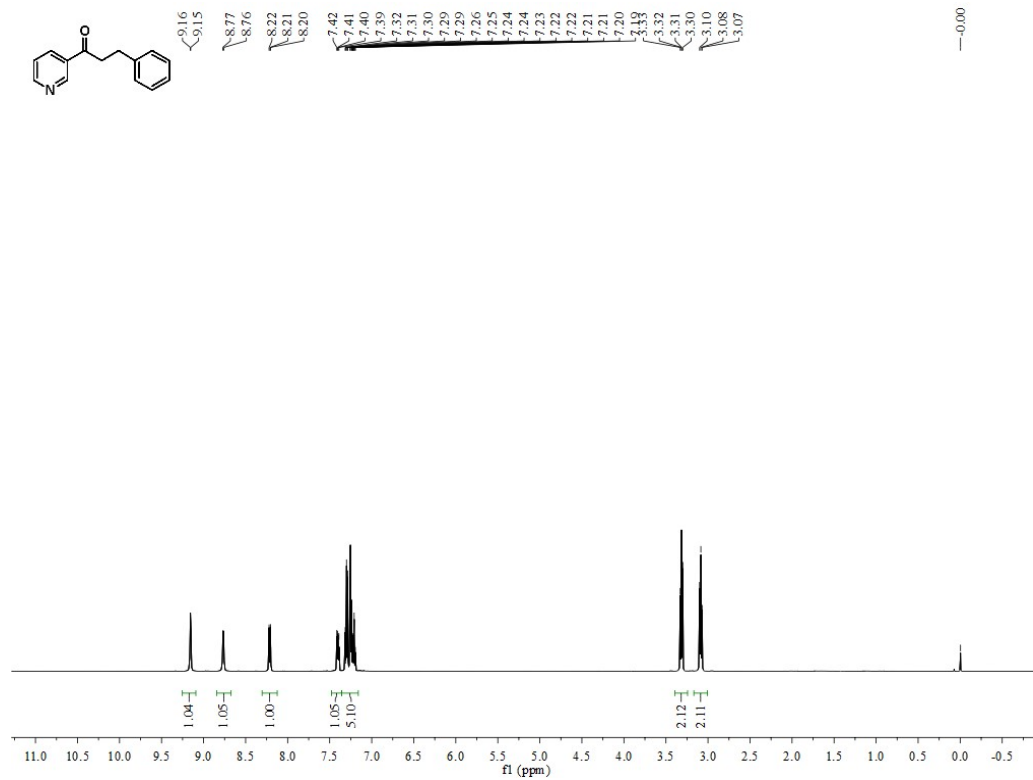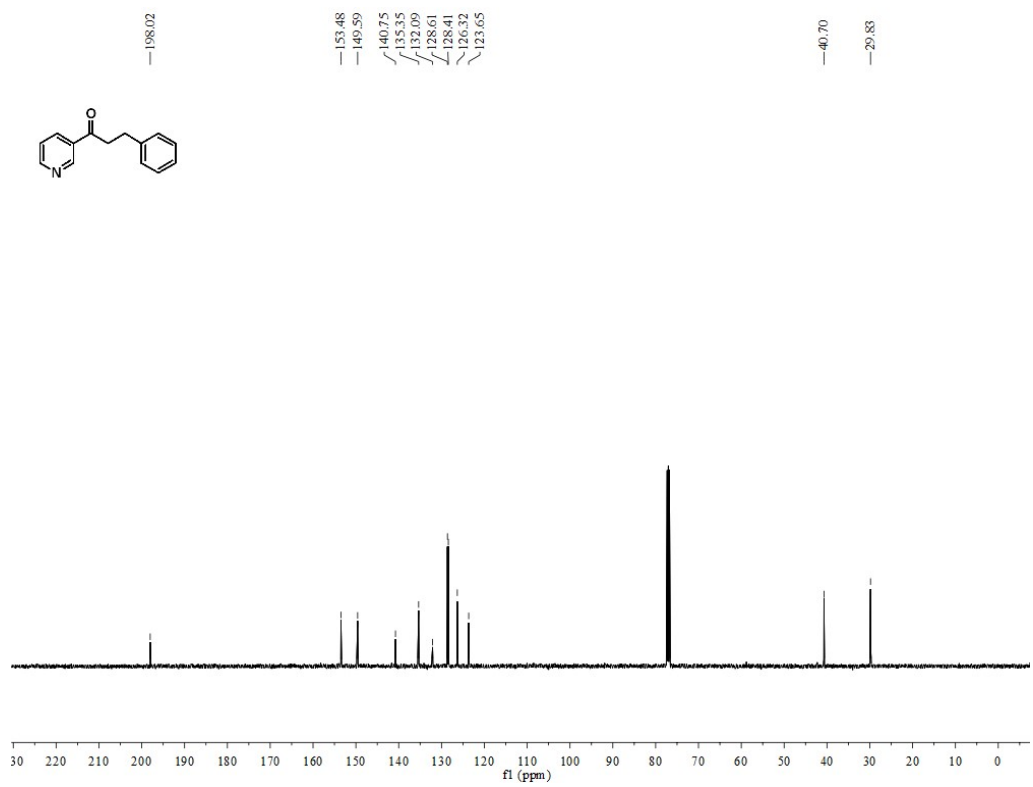

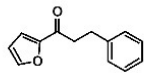

7.57  
7.56  
7.30  
7.30  
7.29  
7.28  
7.27  
7.26  
7.25  
7.23  
7.23  
7.21  
7.21  
7.21  
7.20  
7.18  
7.17  
7.16  
6.52  
6.51  
6.51  
3.17  
3.17  
3.15  
3.14  
3.06  
3.05  
3.04  
3.03

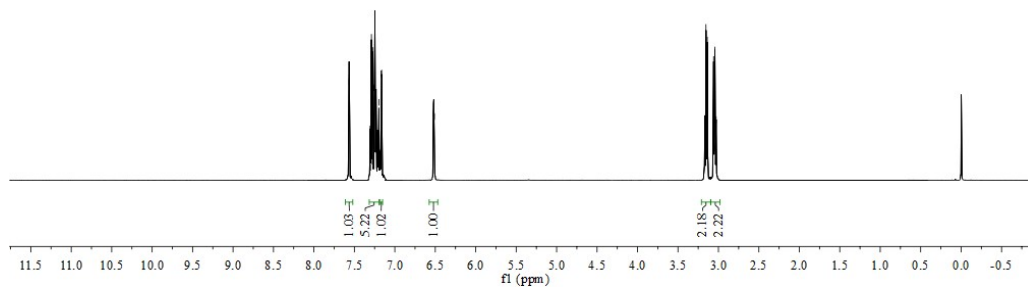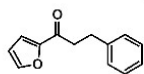

188.51  
152.68  
146.32  
140.97  
128.51  
128.41  
126.17  
117.02  
112.20  
40.18  
29.98

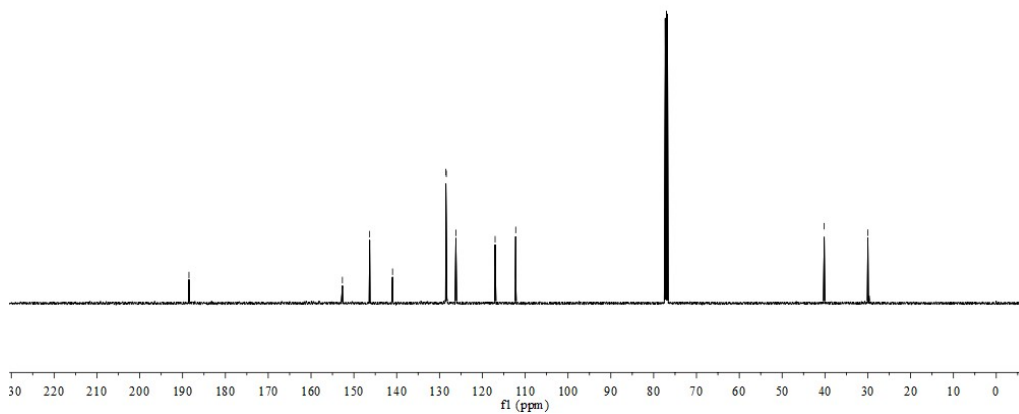

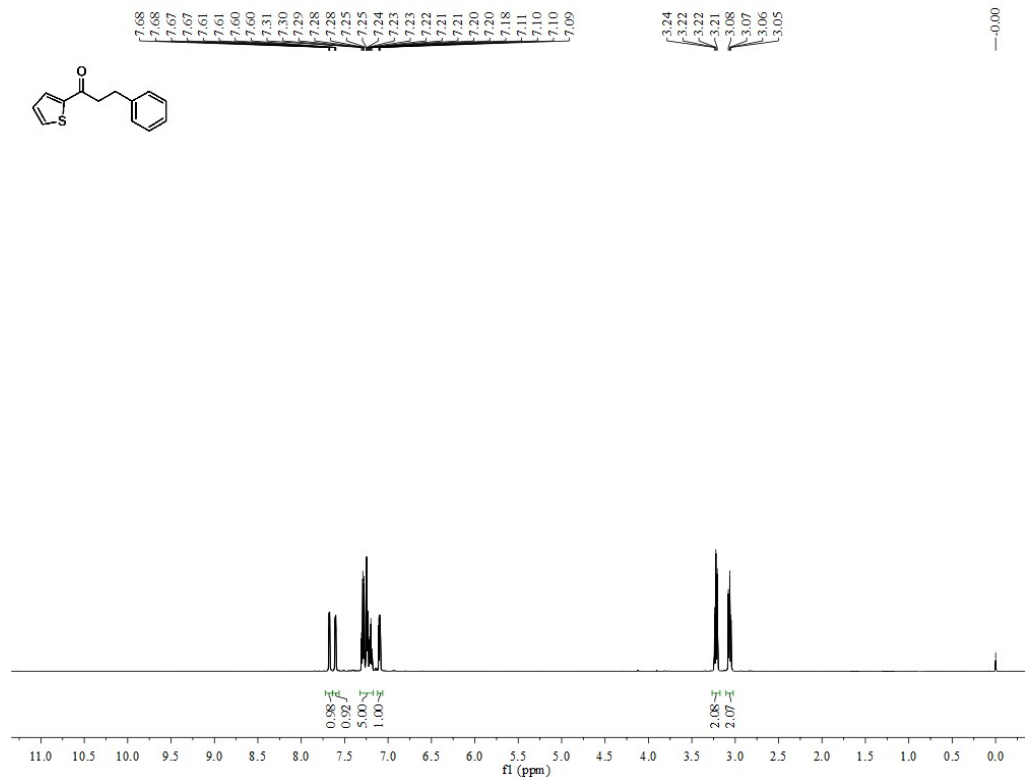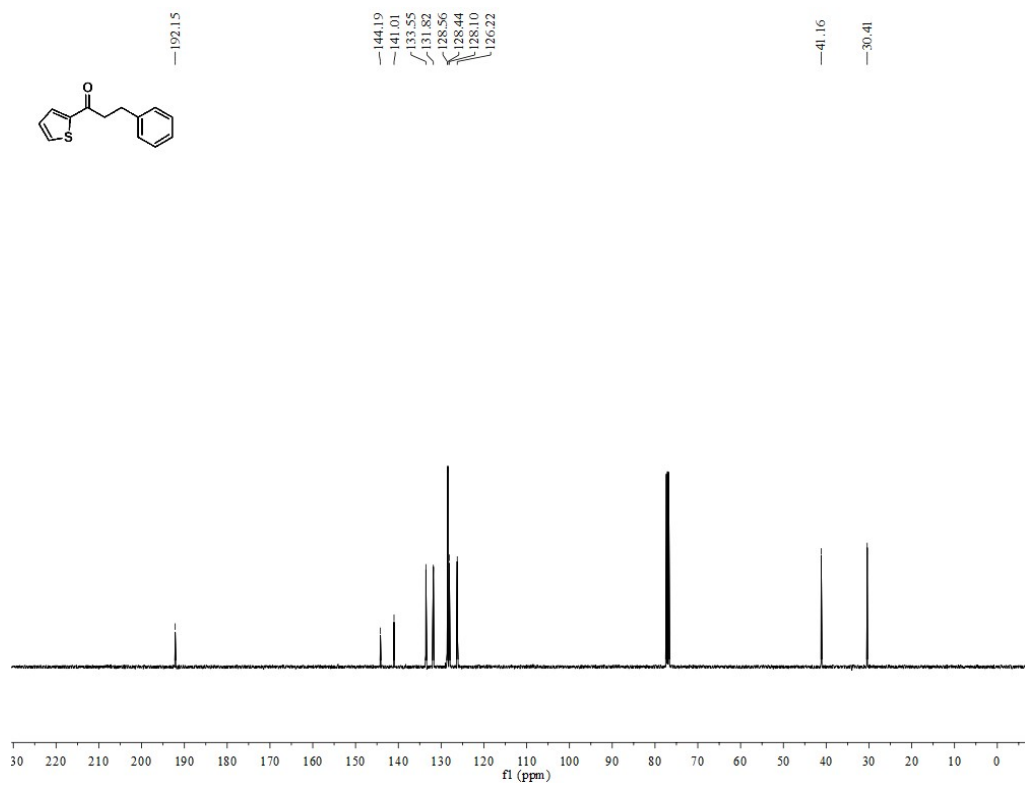



8.08  
8.08  
8.06  
8.06  
7.47  
7.47  
7.46  
7.46  
7.44  
7.44  
7.33  
7.32  
7.32  
7.31  
7.31  
7.30  
7.30  
7.29  
7.29  
7.25  
7.25  
7.24  
7.24  
7.23  
7.22  
7.22  
7.22  
7.21  
7.21  
7.20  
3.51  
3.50  
3.48  
3.48  
2.95  
2.94  
2.93  
2.92  
2.91  
2.91  
2.77  
2.76  
2.75  
2.75  
2.74  
2.74  
2.73  
2.67  
2.65  
2.64  
2.62  
2.13  
2.12  
2.11  
2.10  
2.09  
1.83  
1.82  
1.81  
1.81  
1.80  
1.80  
1.79  
0.00

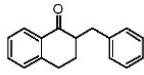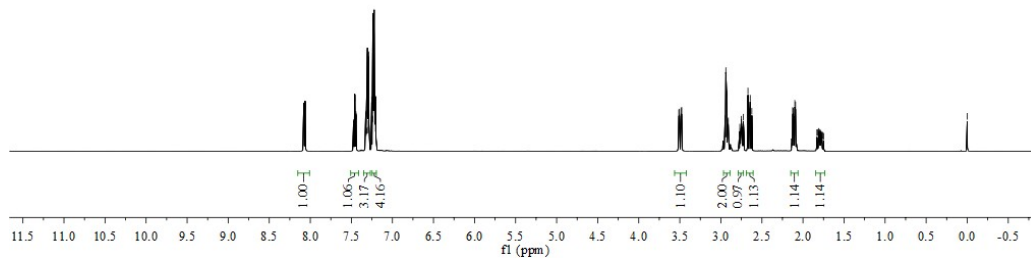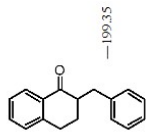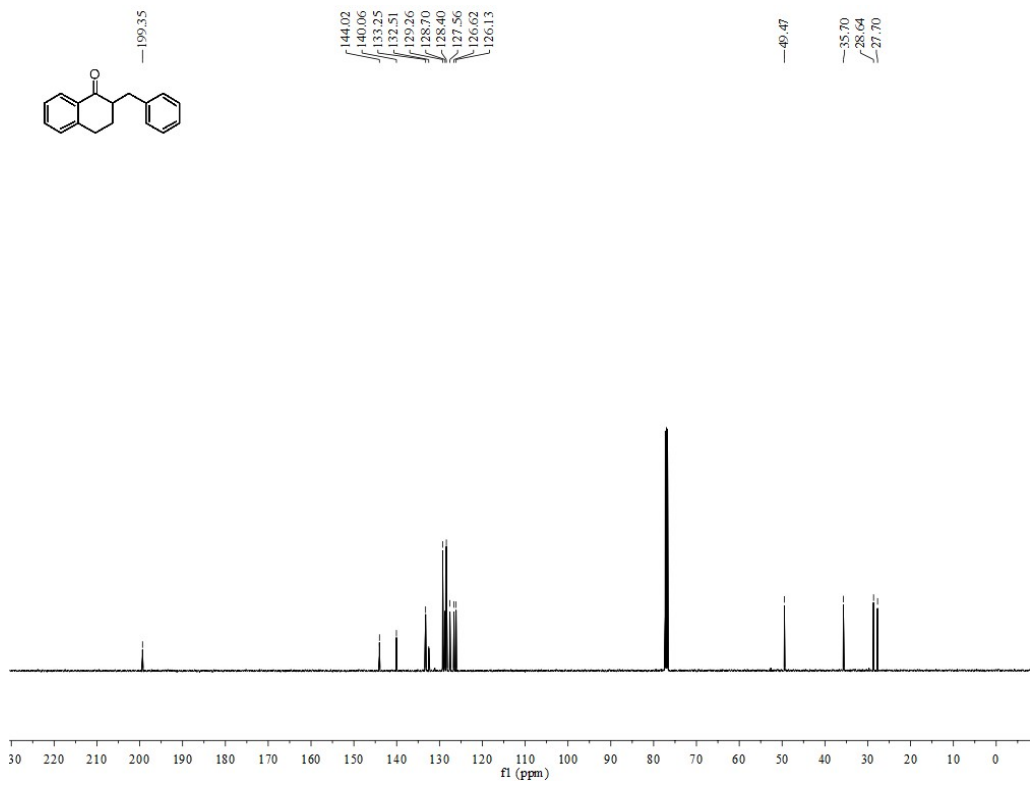

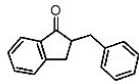

7.79  
7.77  
7.58  
7.56  
7.55  
7.40  
7.39  
7.38  
7.36  
7.35  
7.31  
7.29  
7.28  
7.25  
7.23  
7.22  
7.21  
7.20  
3.42  
3.41  
3.39  
3.38  
3.19  
3.17  
3.15  
3.14  
3.02  
3.01  
3.00  
2.99  
2.98  
2.88  
2.87  
2.84  
2.84  
2.69  
2.67  
2.66  
2.64

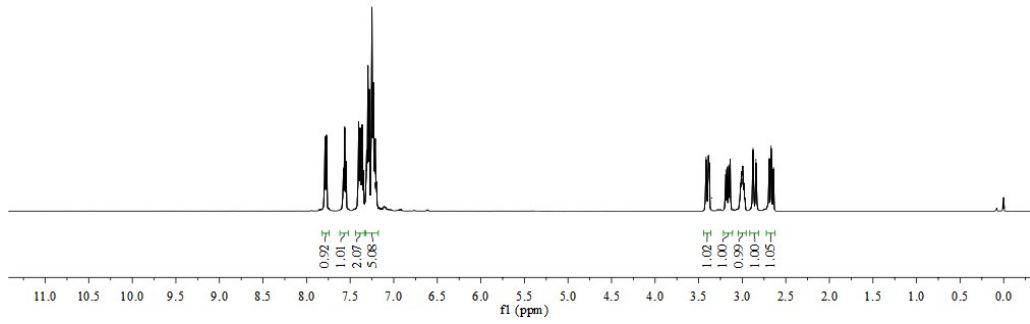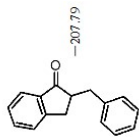

153.63  
139.66  
136.58  
134.82  
128.92  
128.54  
127.44  
126.60  
126.36  
124.04  
48.96  
37.02  
32.22

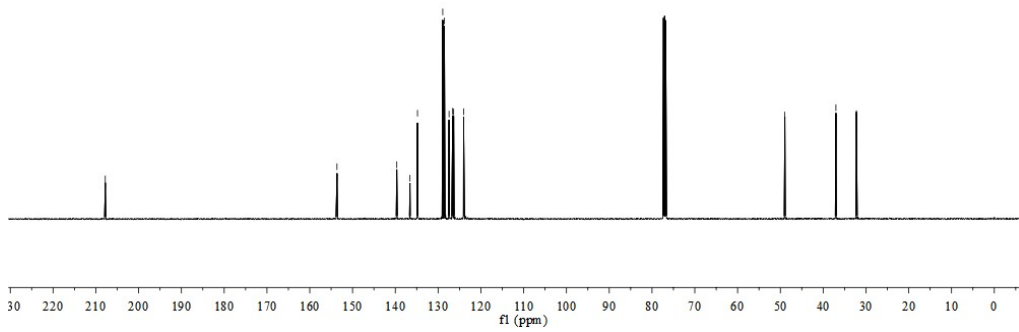

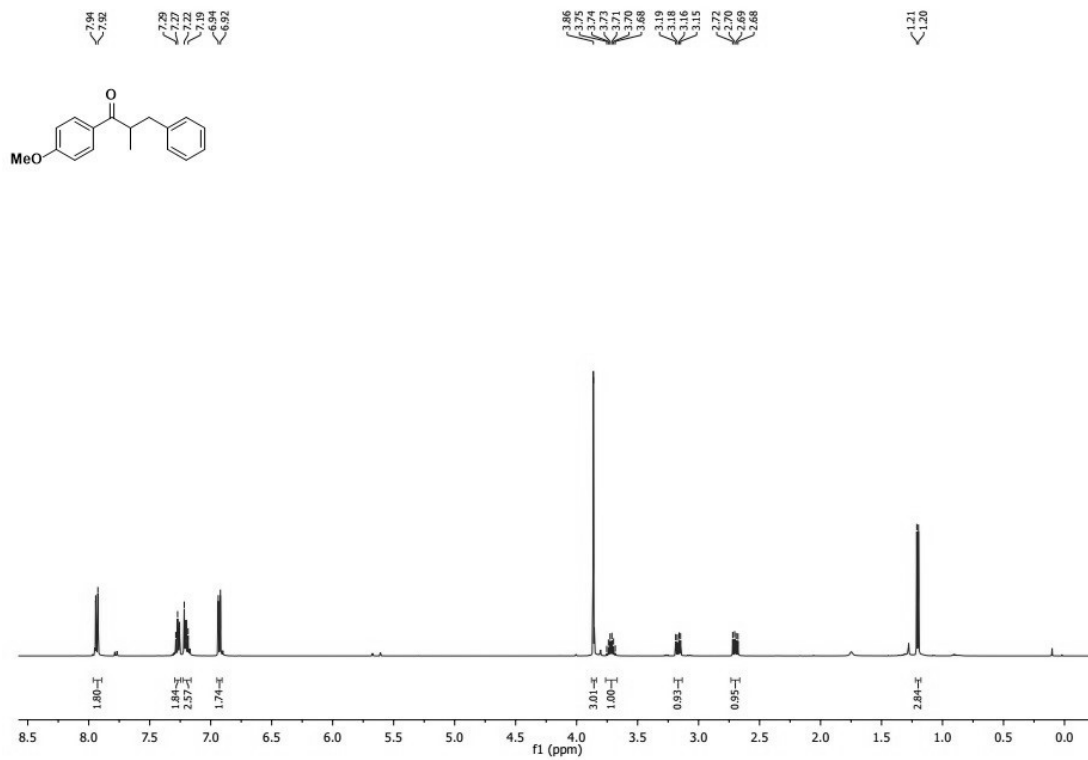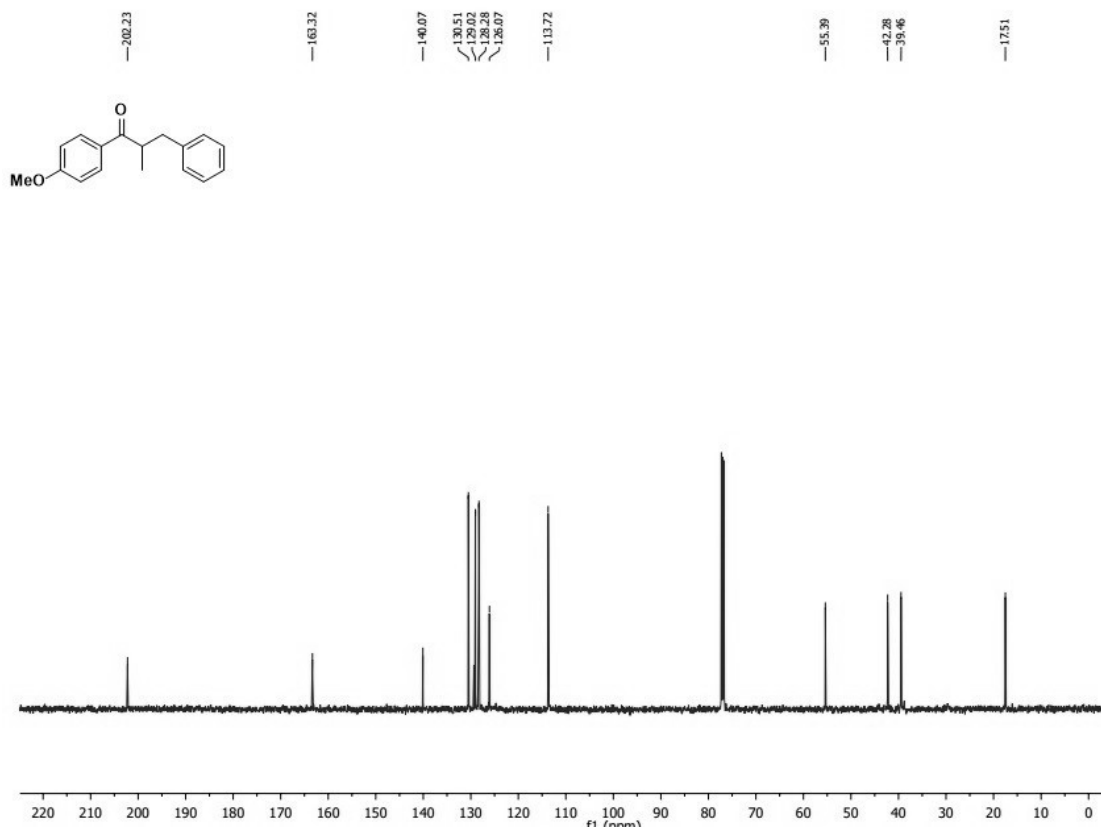

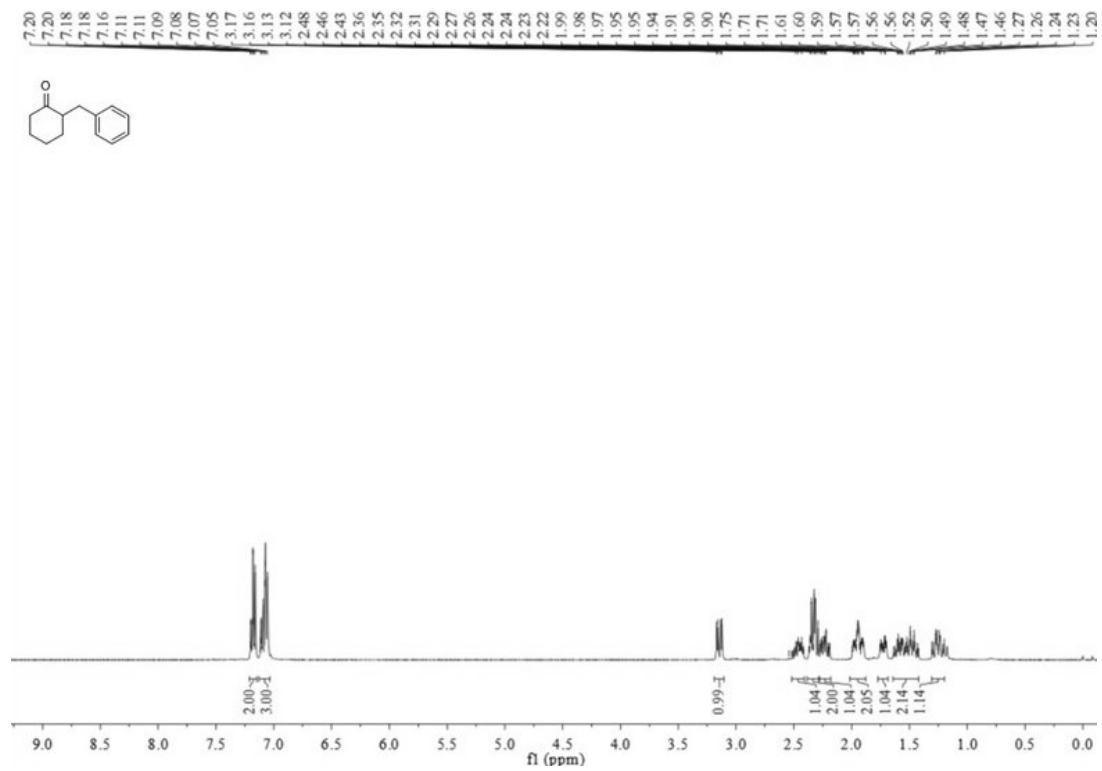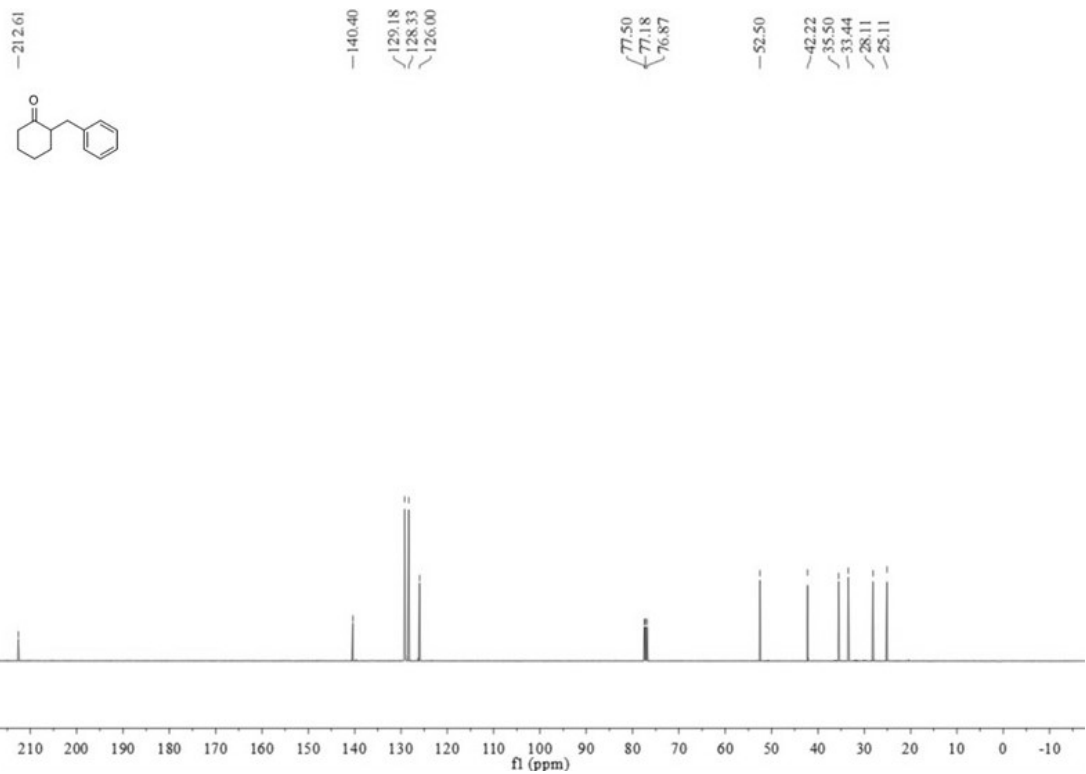

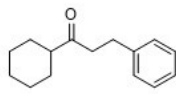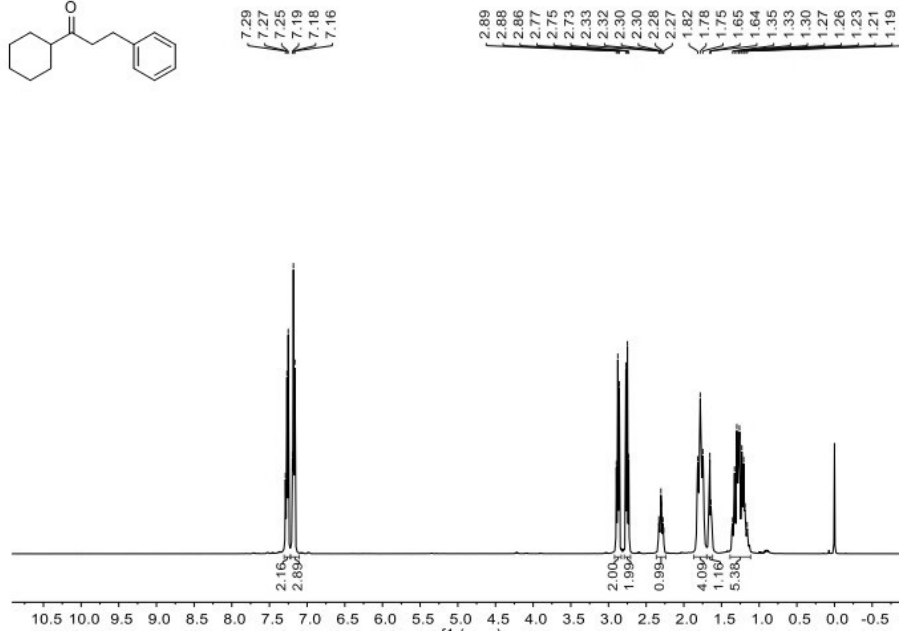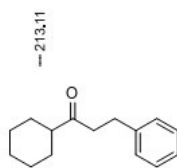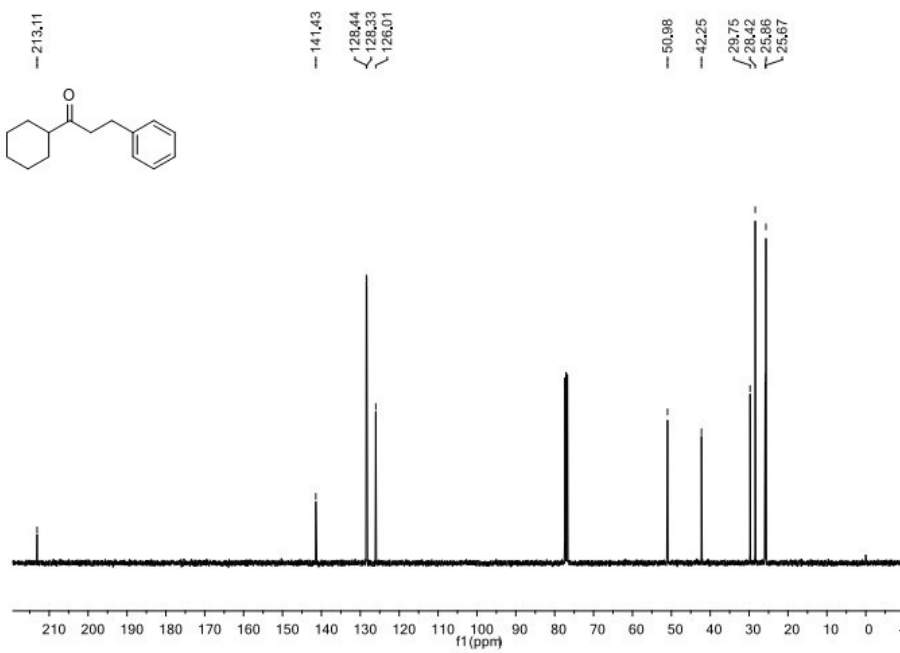

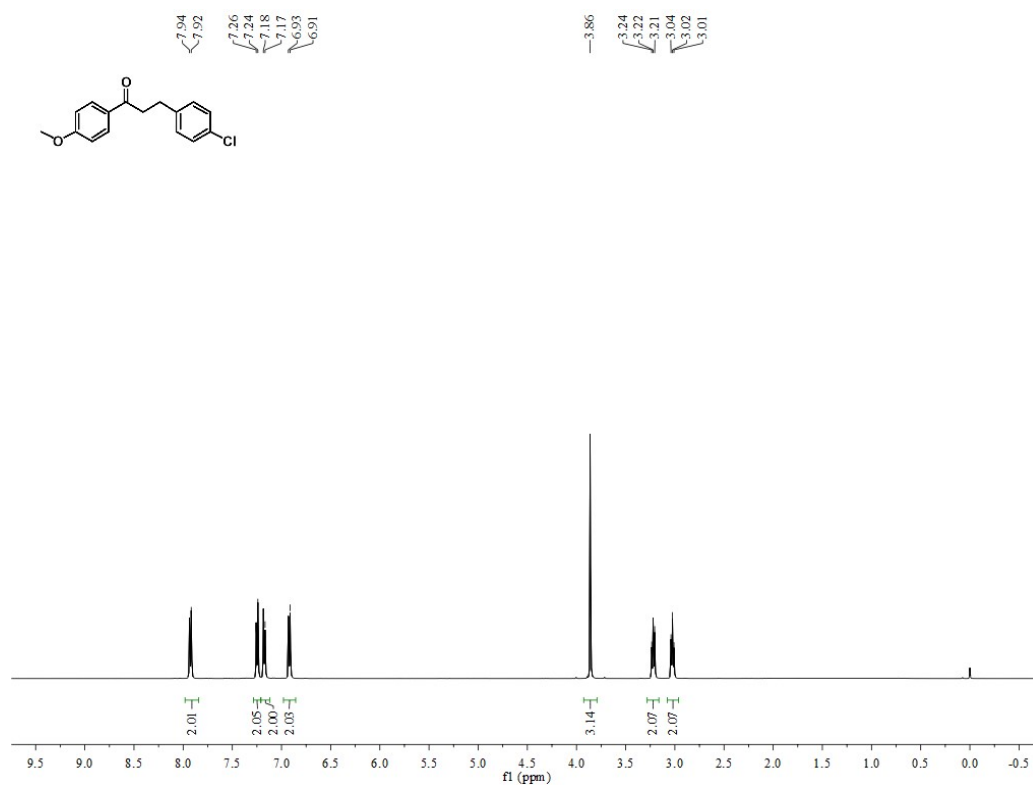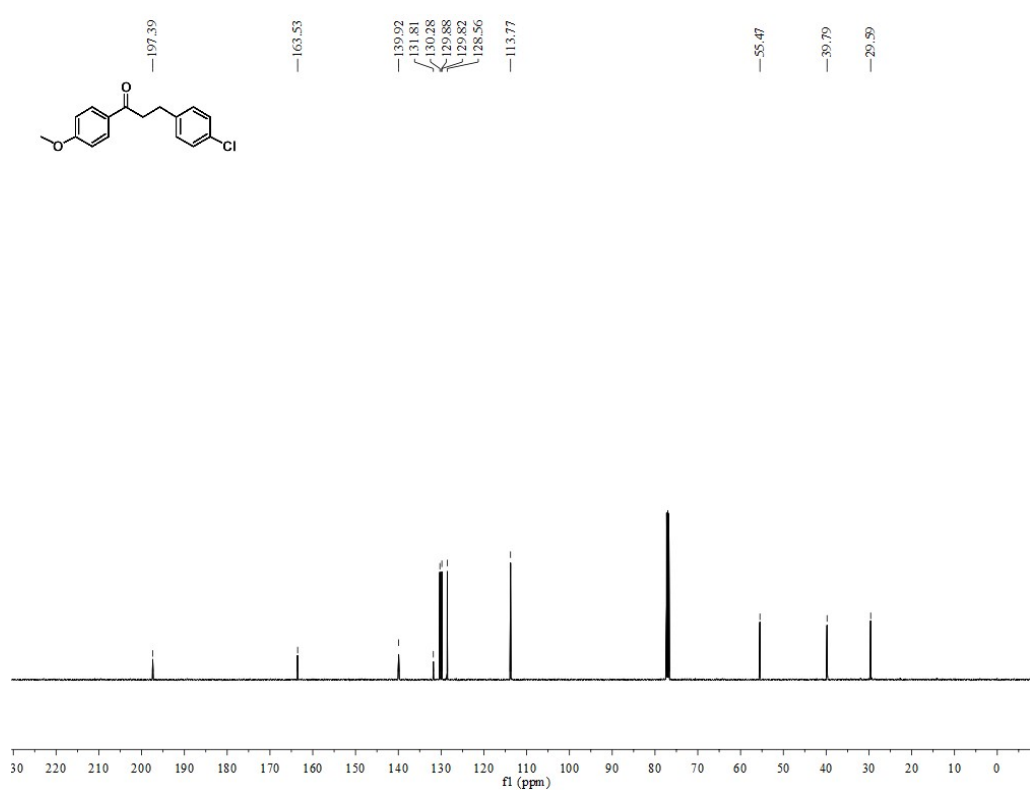

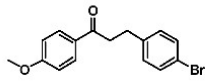

7.93  
7.92  
7.41  
7.39  
7.13  
7.12  
6.93  
6.91

3.86  
3.24  
3.22  
3.21  
3.03  
3.01  
3.00

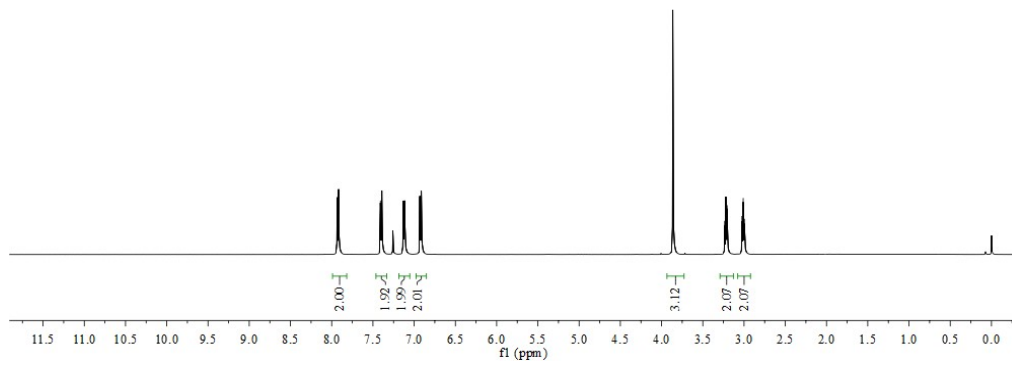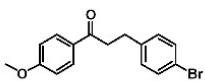

197.35

163.54

140.44

131.52

130.27

129.88

119.83

113.77

55.47

39.71

29.64

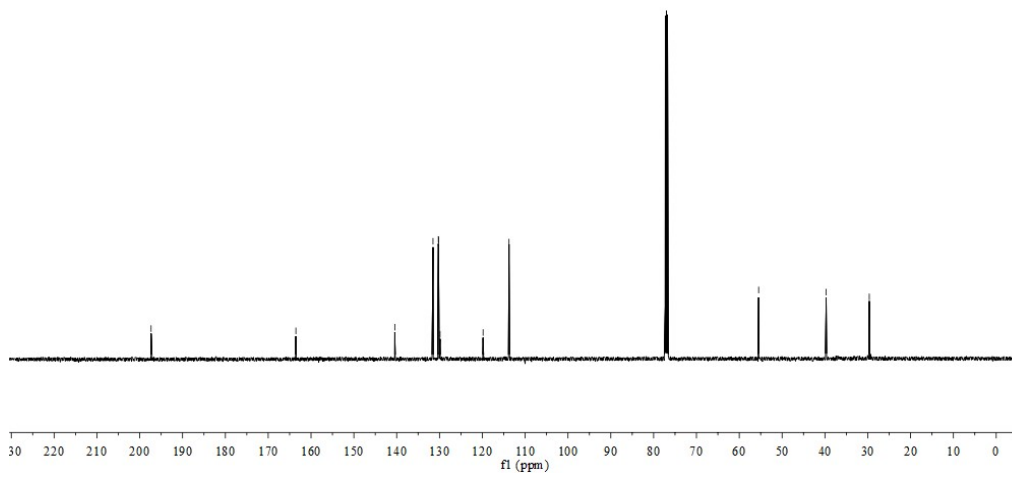

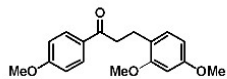

7.96  
7.94  
7.09  
7.08  
6.92  
6.90  
6.45  
6.45  
6.42  
6.41

3.85  
3.80  
3.78  
3.18  
3.17  
3.16  
3.15  
2.97  
2.96  
2.96  
2.94

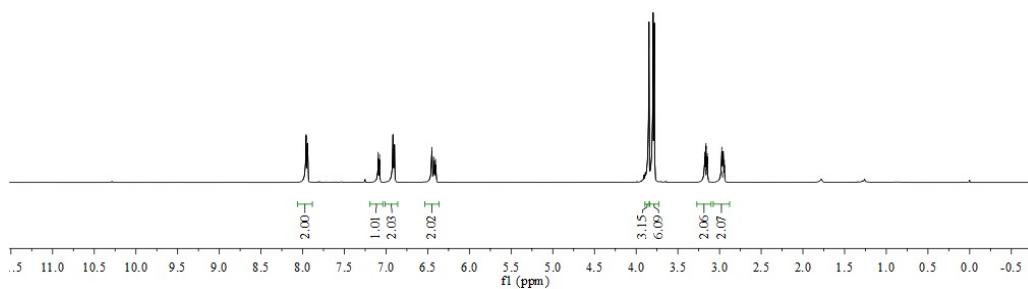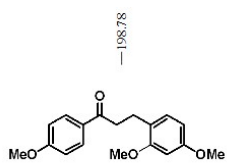

198.78

163.30  
159.46  
158.38

130.36  
130.31  
130.15  
122.04

113.64

103.89  
98.56

55.44  
55.37  
55.24

38.92

25.35

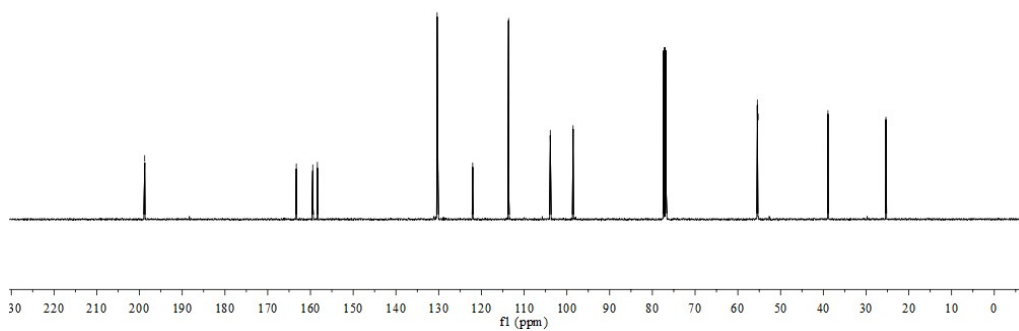



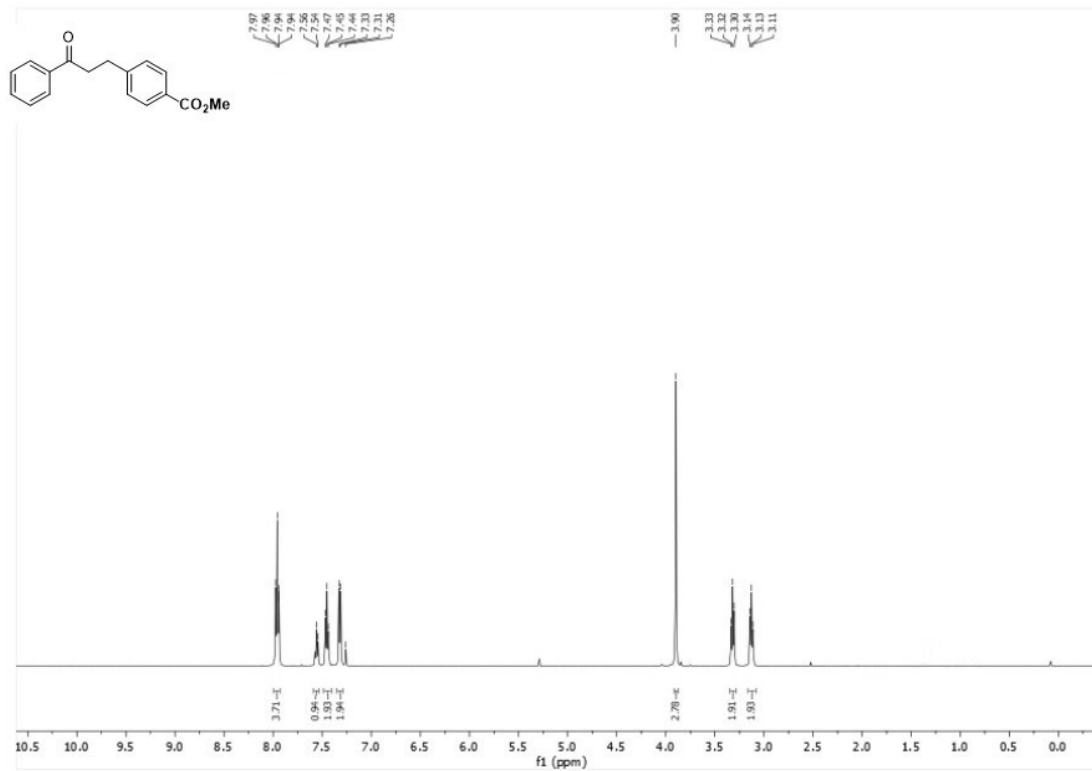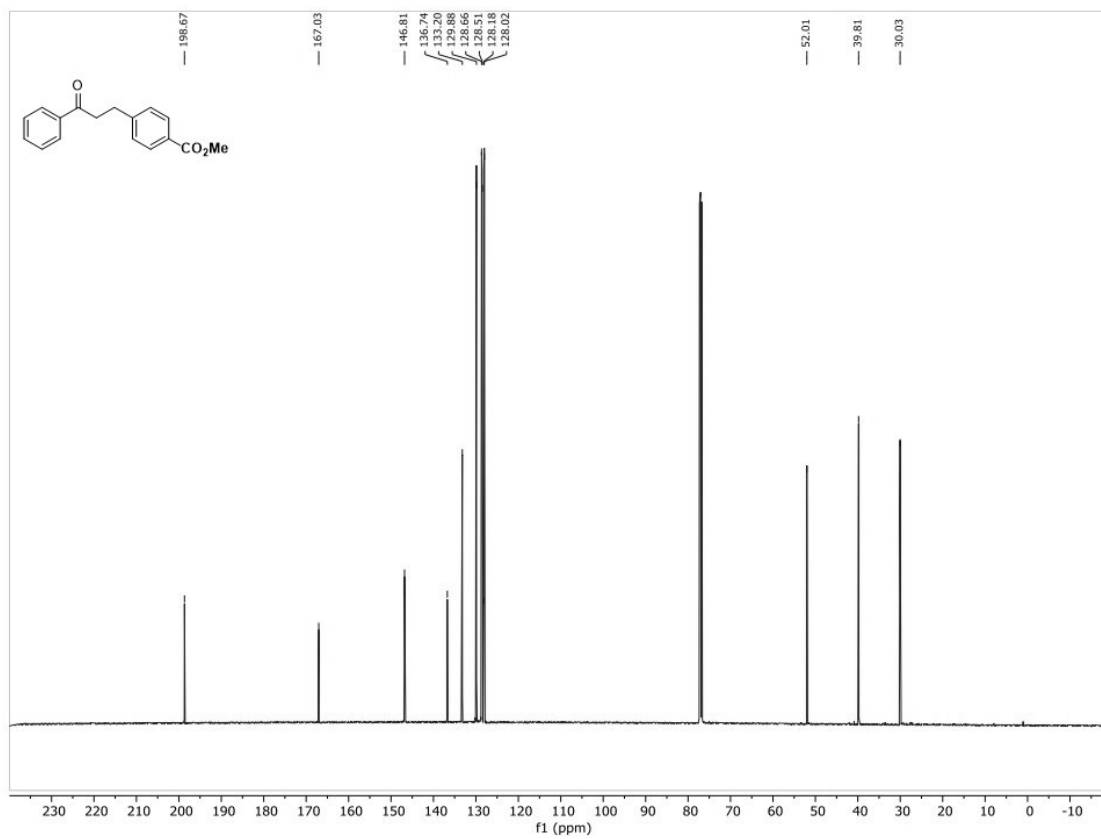

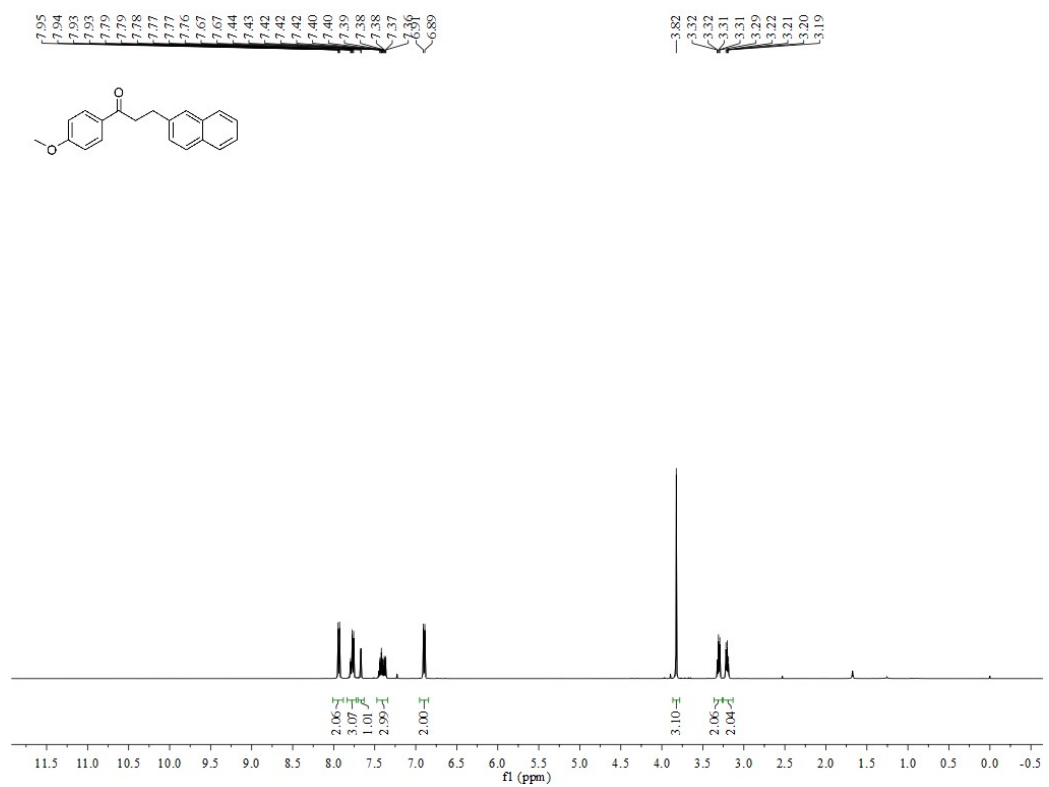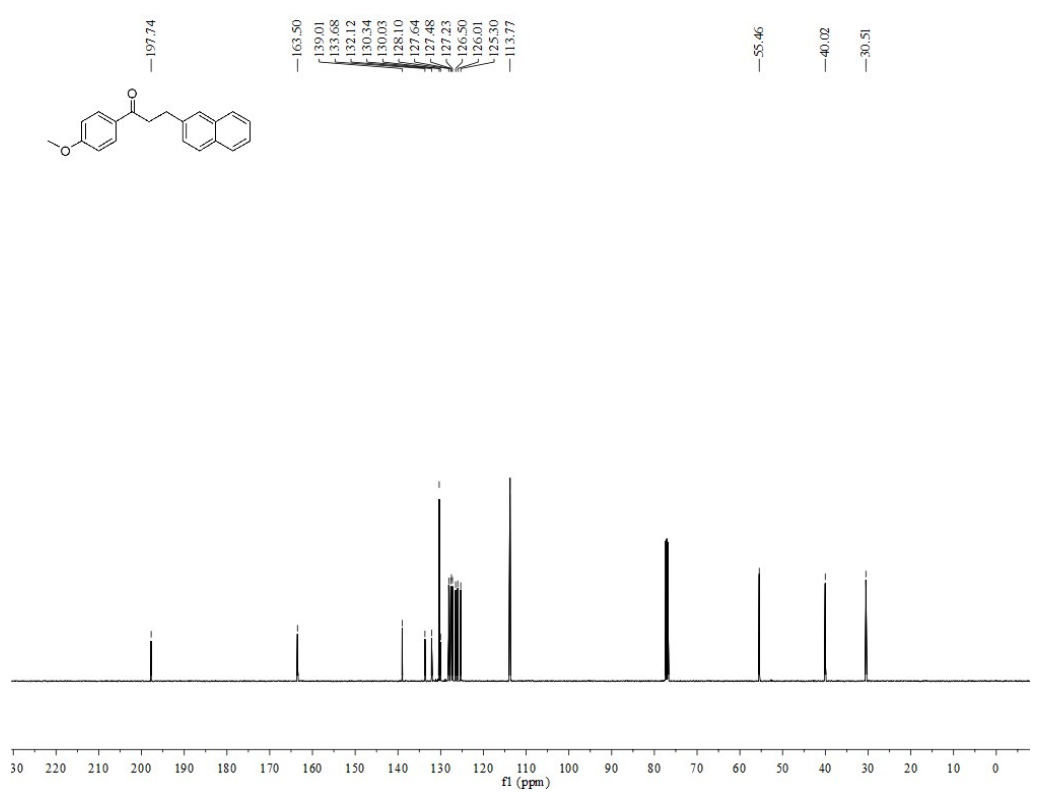

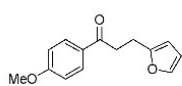

7.96  
7.95  
7.31  
6.94  
6.92  
6.28  
6.28  
6.05  
3.86  
3.29  
3.28  
3.26  
3.09  
3.08

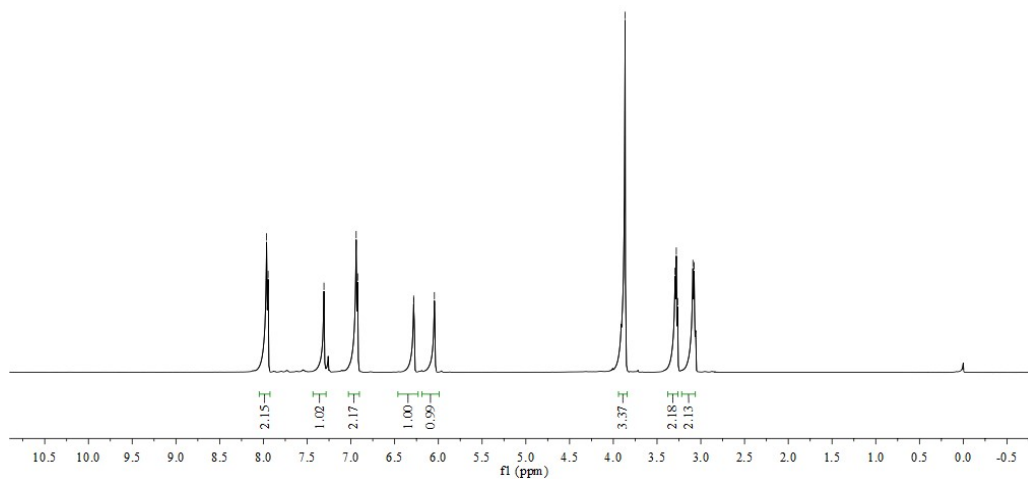

197.24  
163.53  
154.97  
141.06  
130.31  
129.88  
113.76  
110.25  
105.25  
55.48  
36.57  
22.69

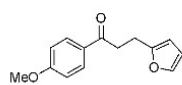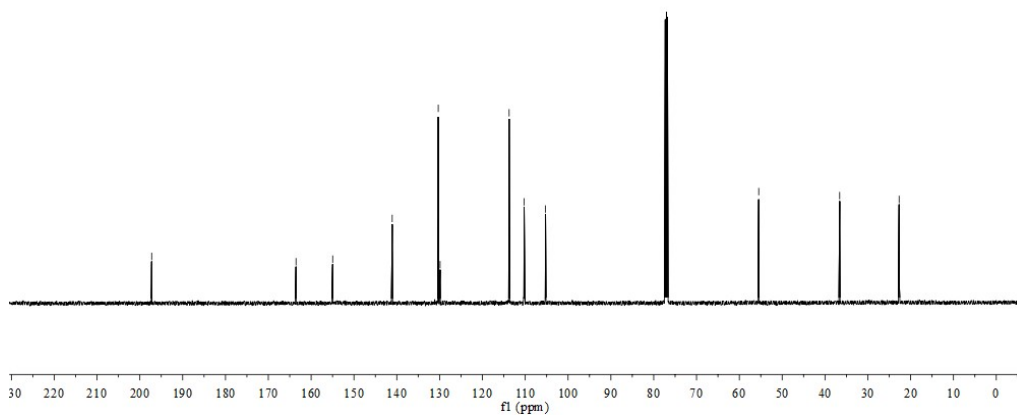

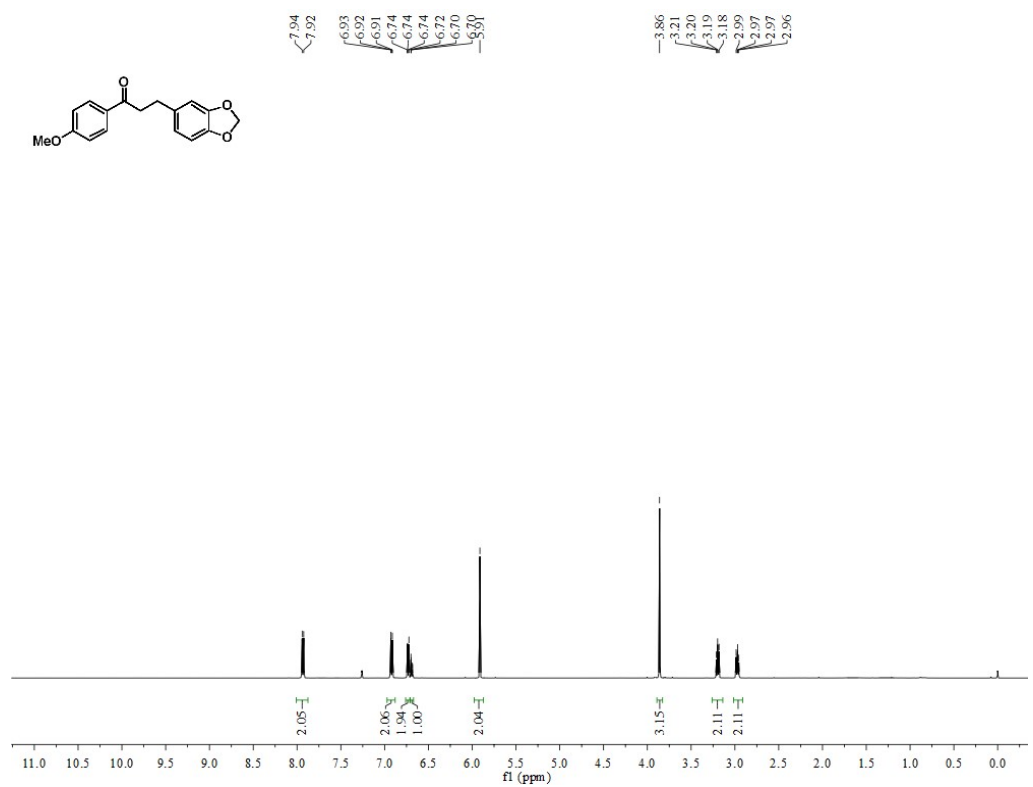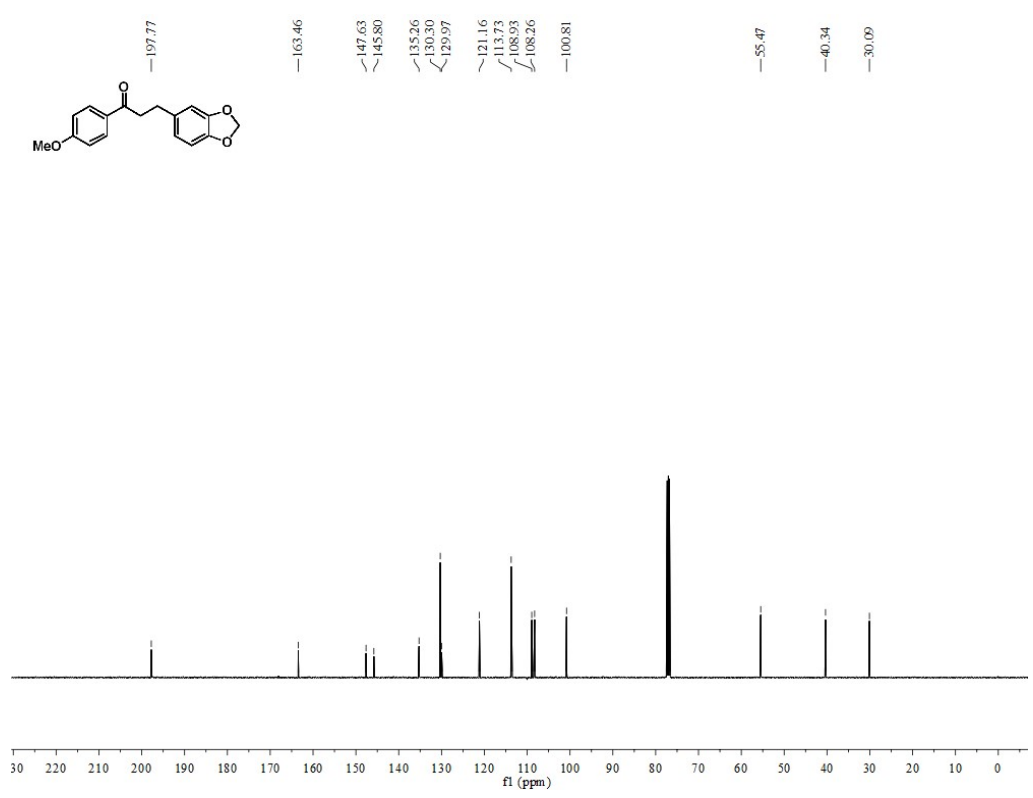

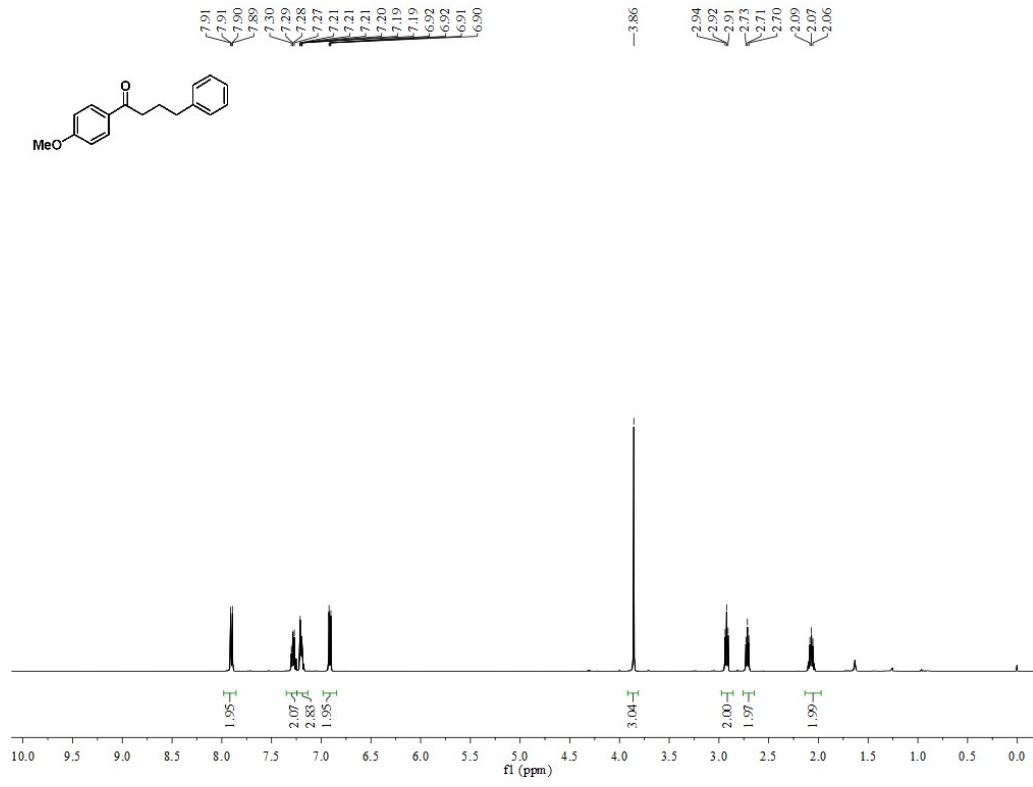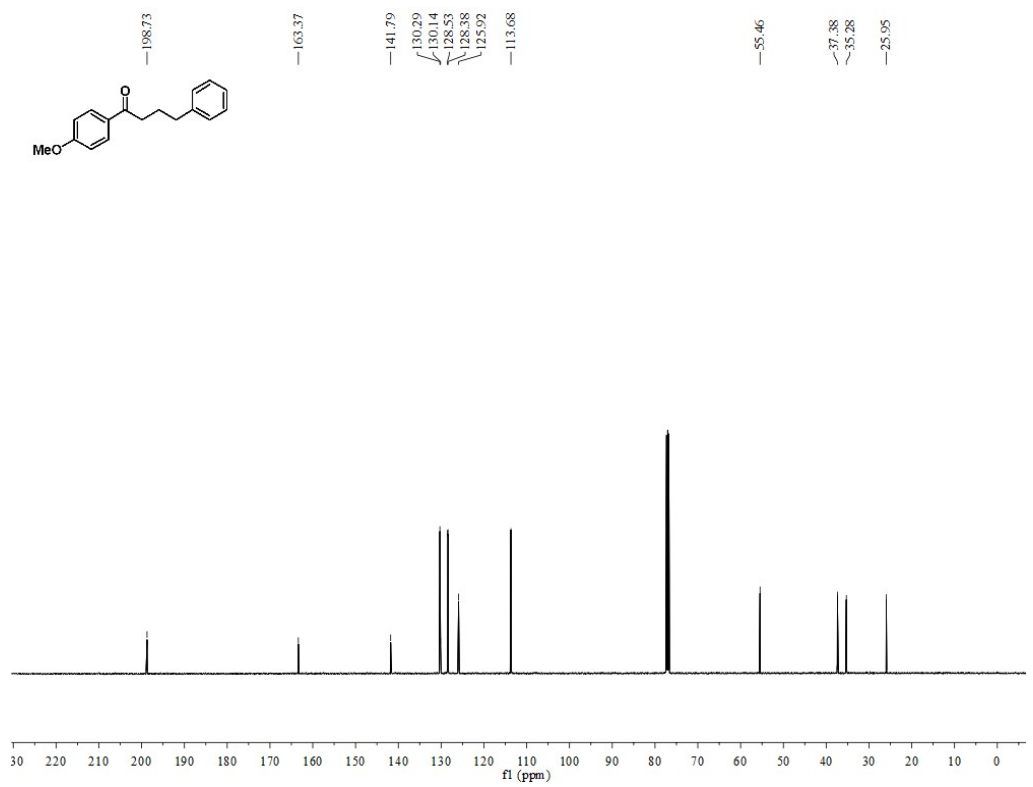

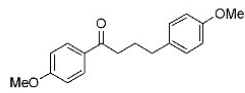

7.91  
7.89  
7.12  
7.11  
6.92  
6.90  
6.84  
6.82

3.85  
3.78  
2.92  
2.90  
2.89  
2.67  
2.65  
2.04  
2.03  
2.01

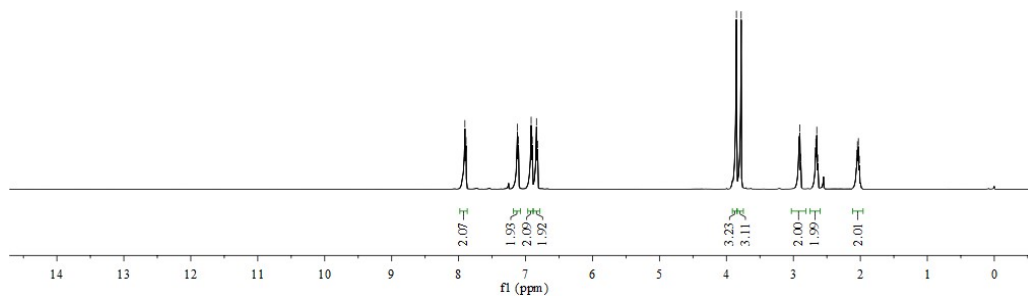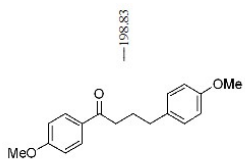

198.83  
163.37  
157.87  
133.86  
130.30  
130.16  
129.42  
113.81  
113.69  
55.46  
55.27  
37.34  
34.37  
26.21

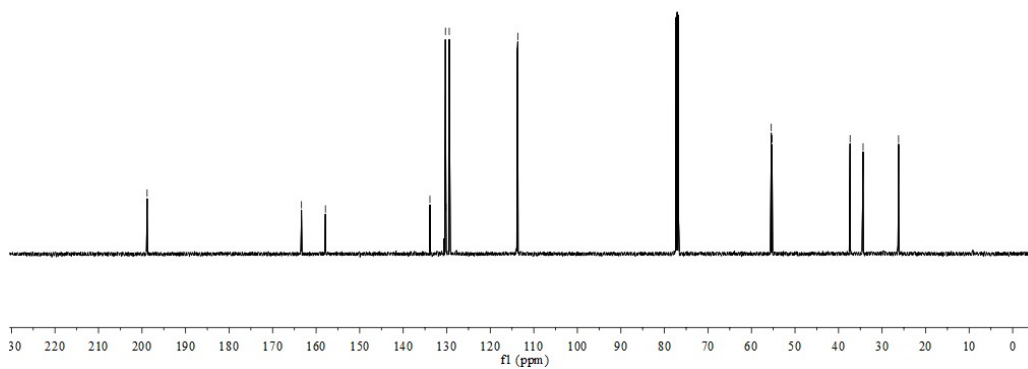

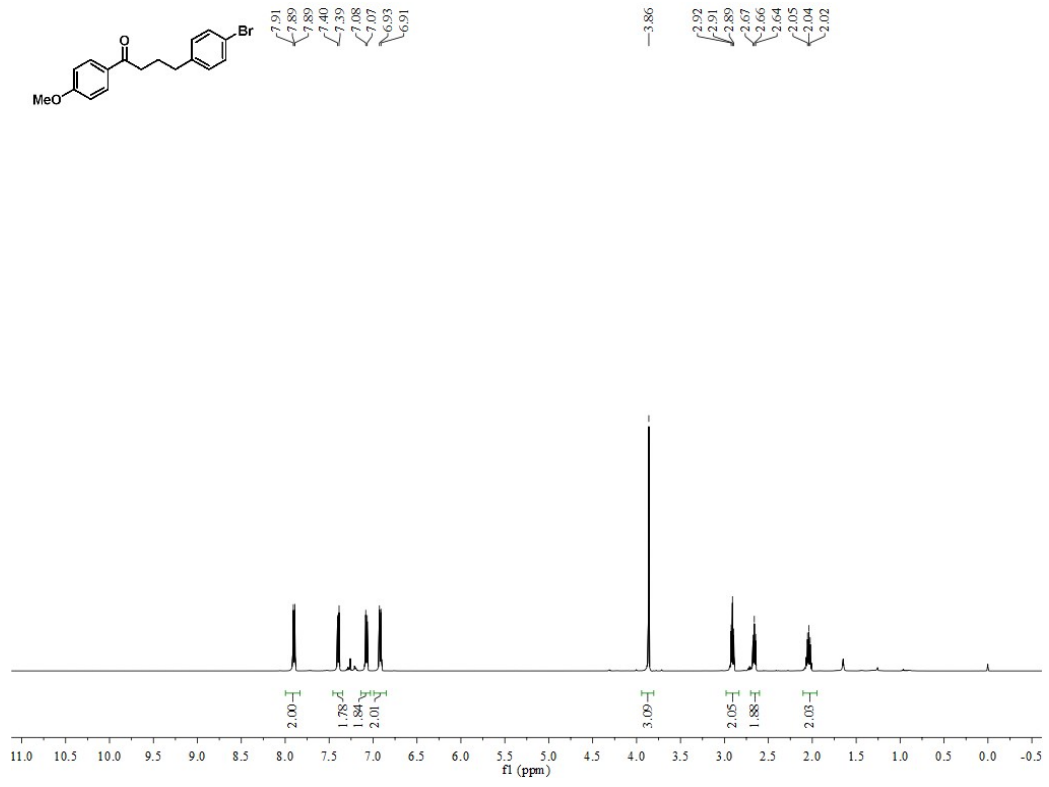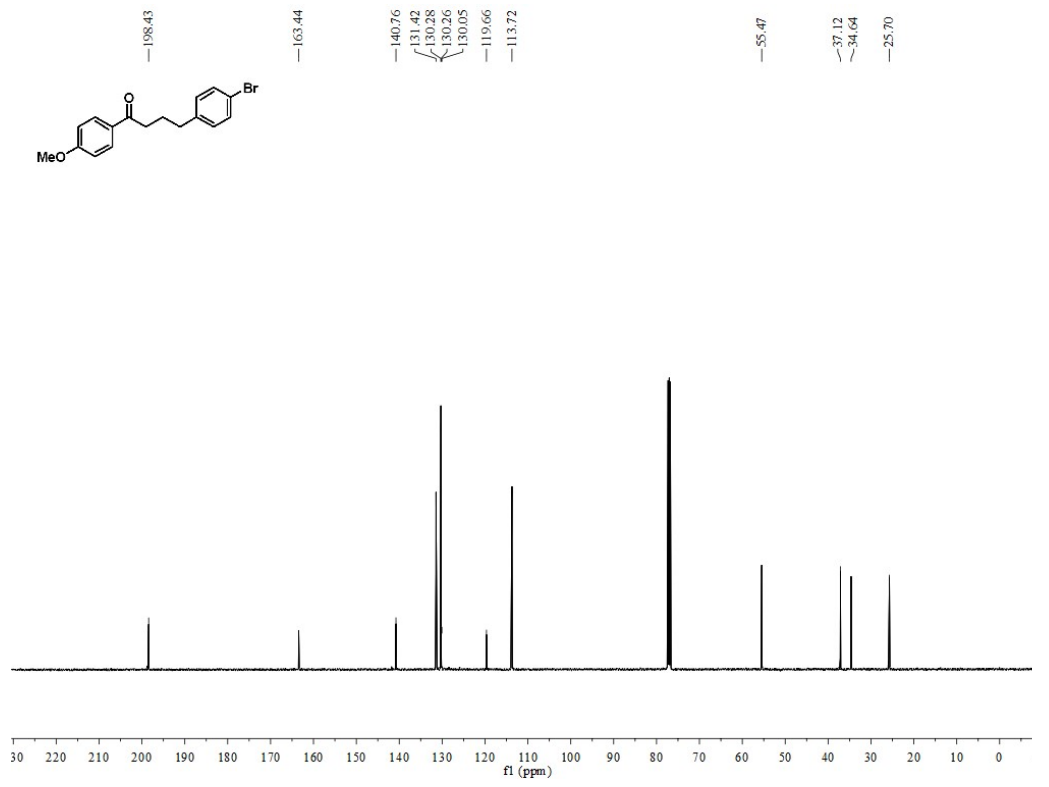

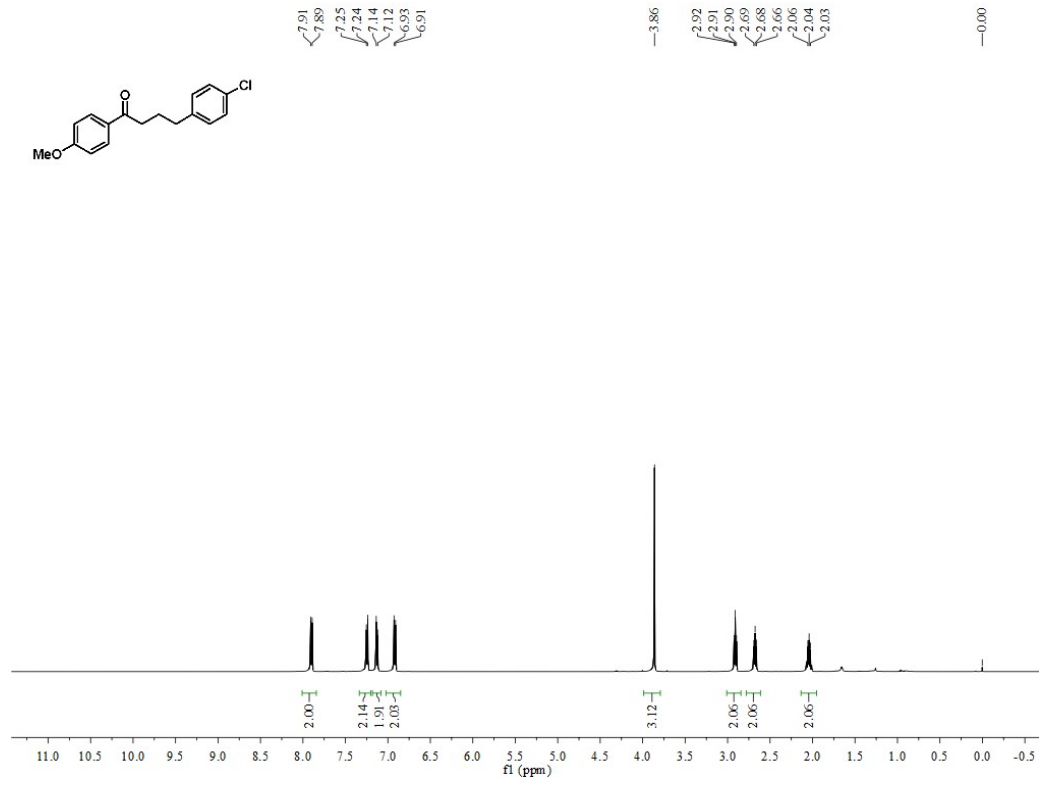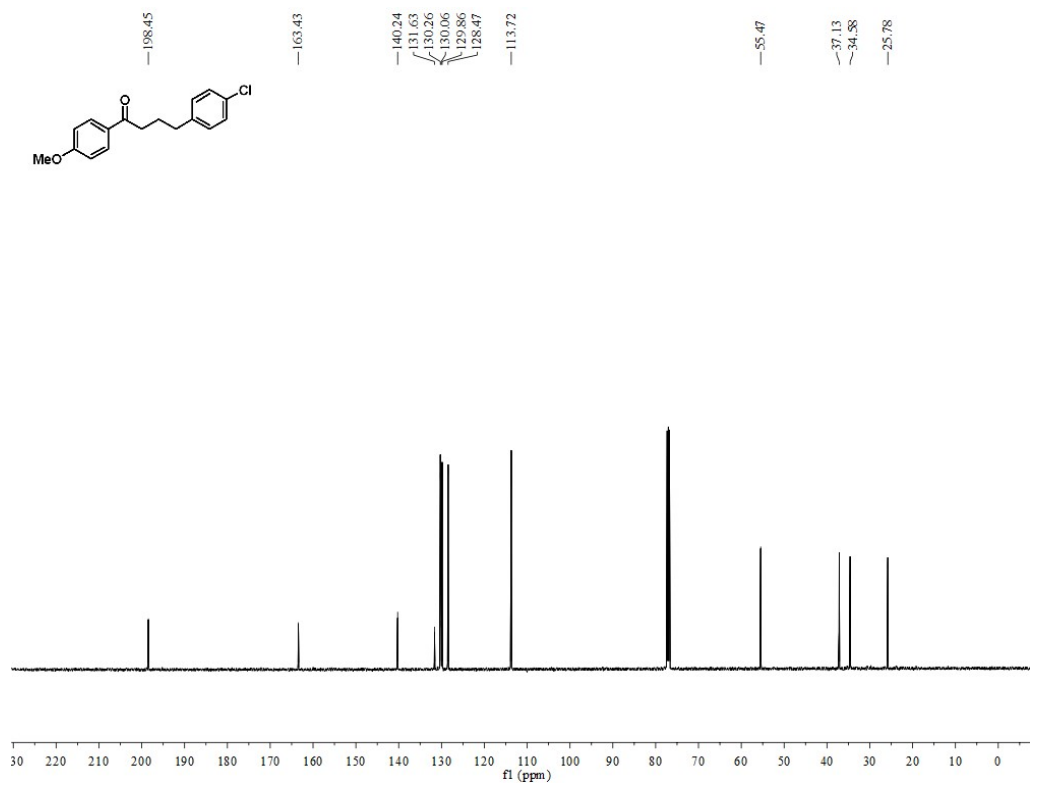



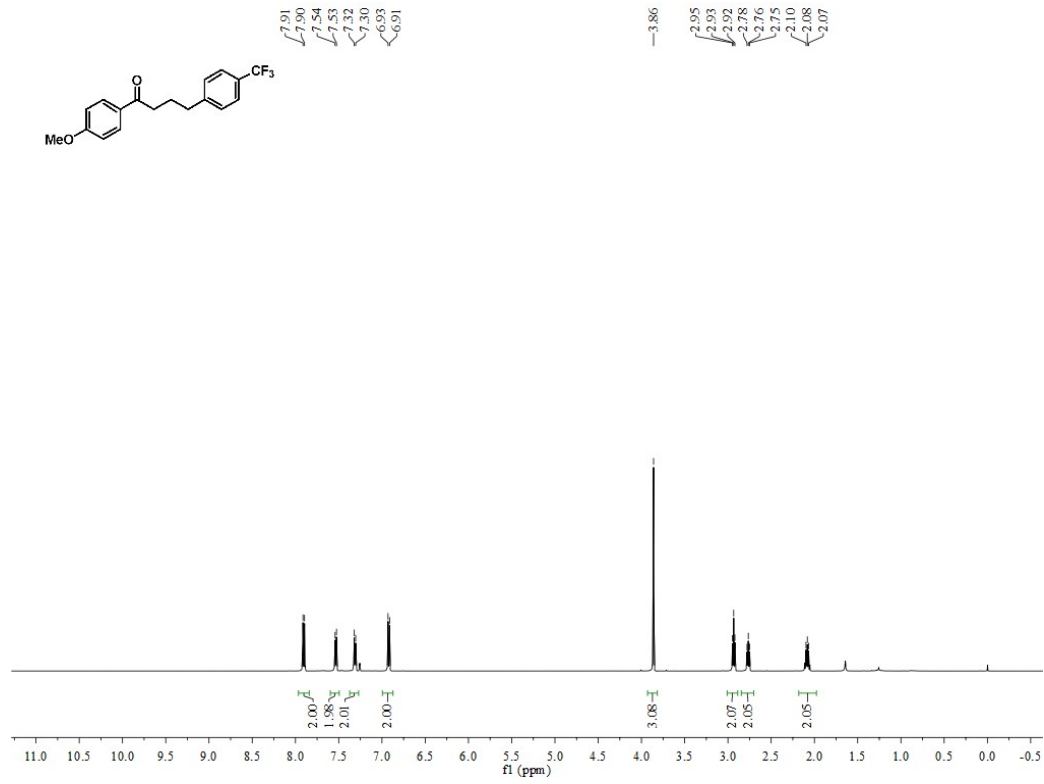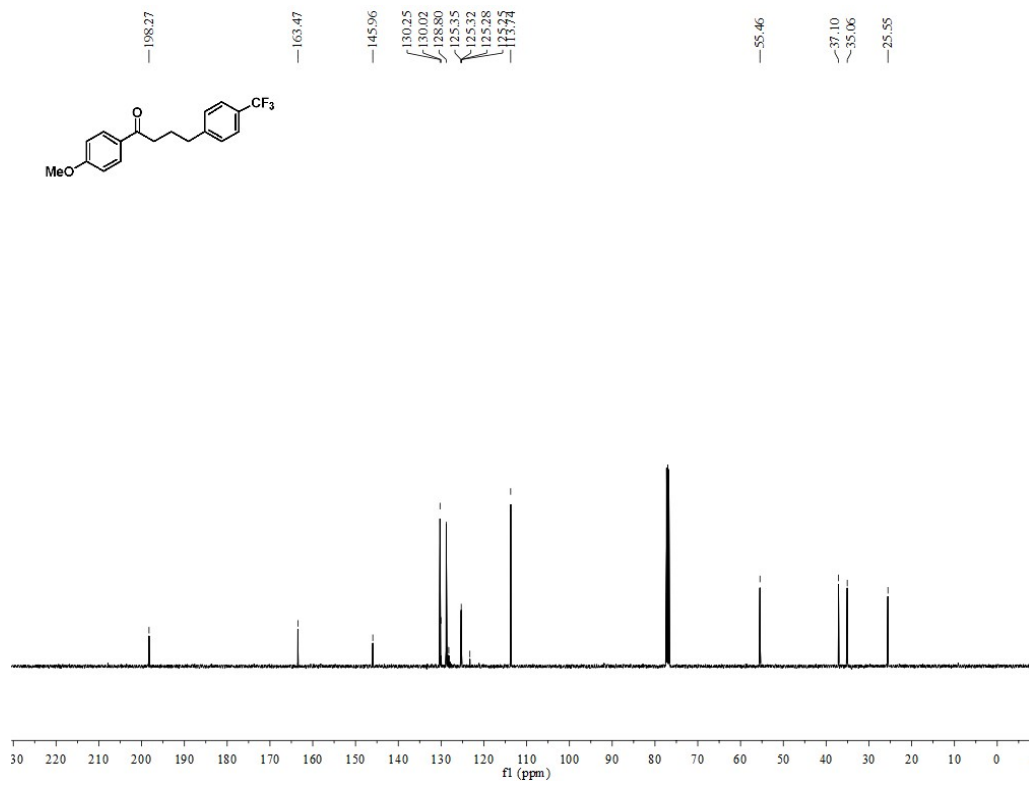

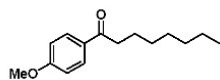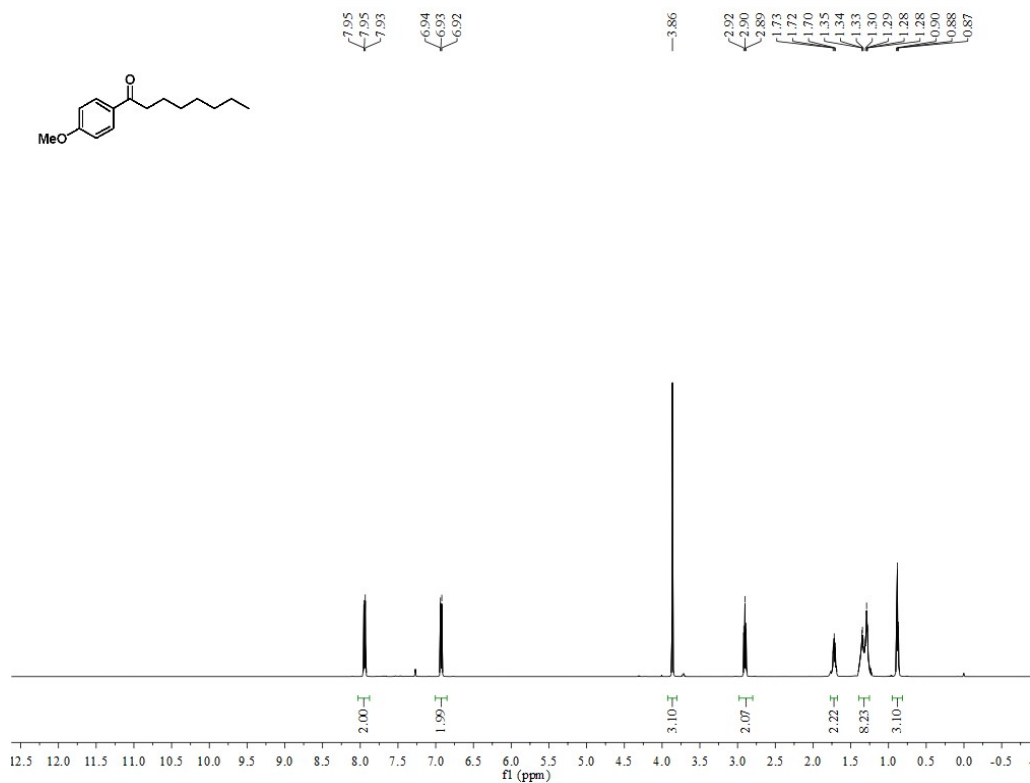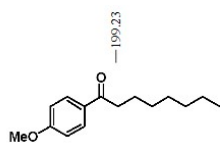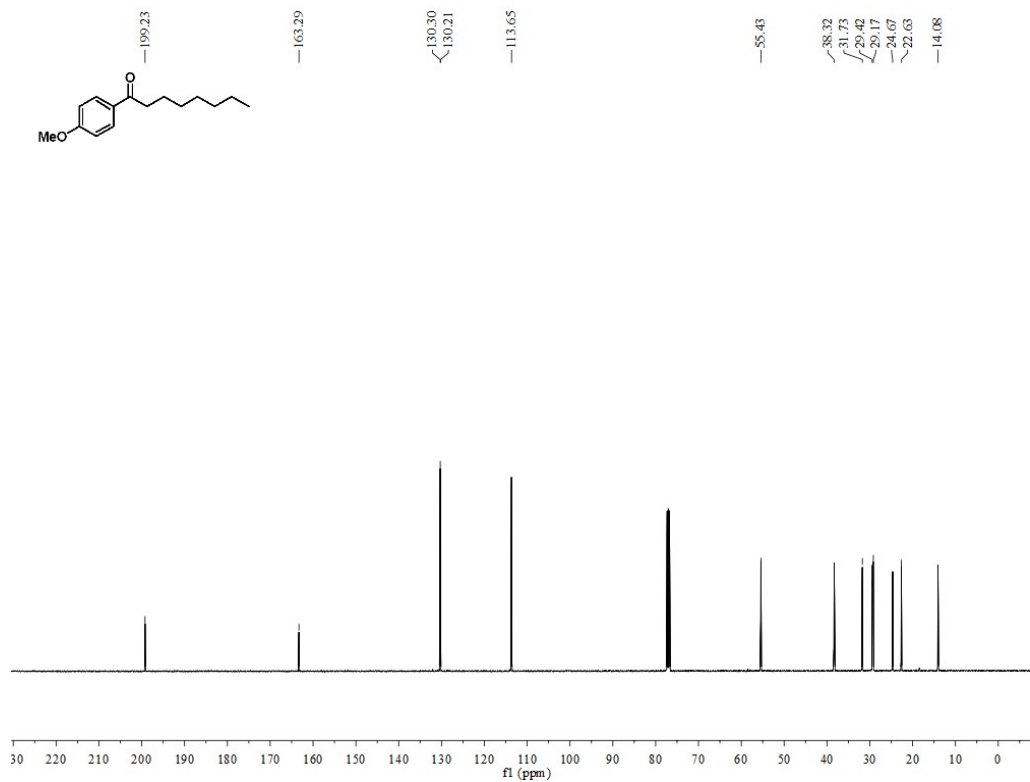

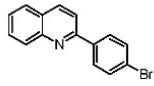

8.13  
8.11  
8.08  
8.06  
7.97  
7.95  
7.74  
7.73  
7.66  
7.66  
7.65  
7.65  
7.64  
7.63  
7.63  
7.57  
7.55  
7.47  
7.46  
7.45  
7.45  
7.44  
7.44  
7.43

-0.00

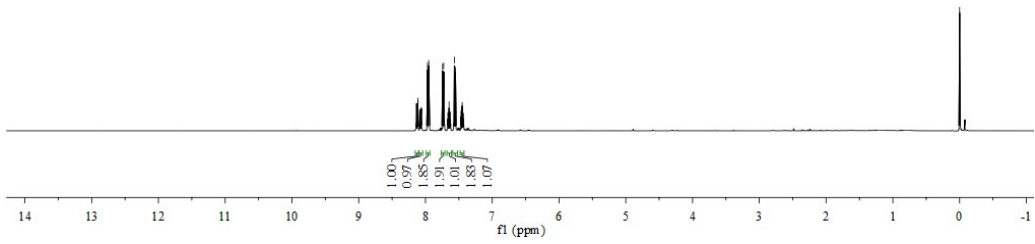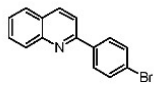

156.02  
148.22  
138.47  
137.00  
131.97  
129.87  
129.69  
129.11  
128.46  
127.50  
126.54  
123.95  
118.50

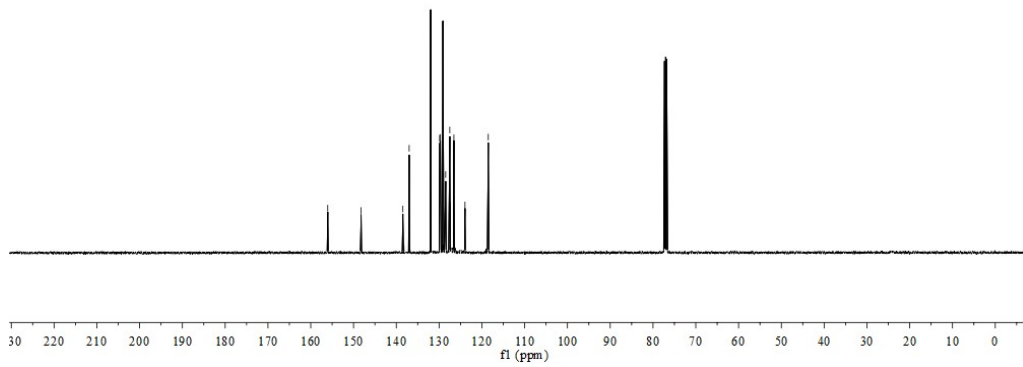

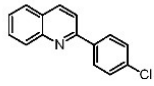

8.205  
8.188  
8.156  
8.139  
8.120  
8.116  
8.106  
8.102  
7.747  
7.745  
7.732  
7.729  
7.726  
7.723  
7.588  
7.491  
7.473

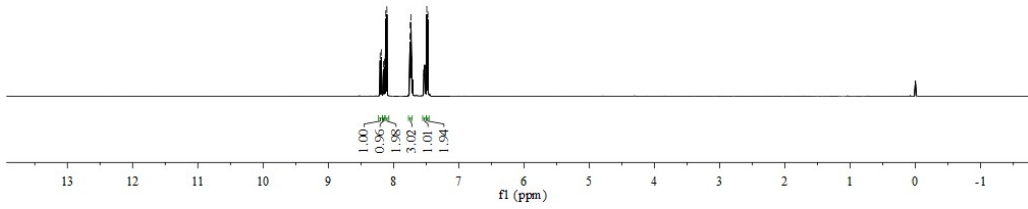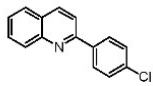

156.00  
148.27  
137.56  
129.85  
129.74  
128.08  
127.50  
126.55

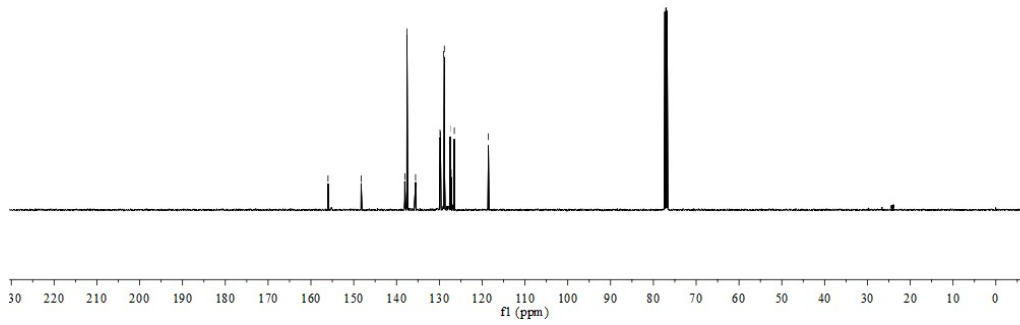

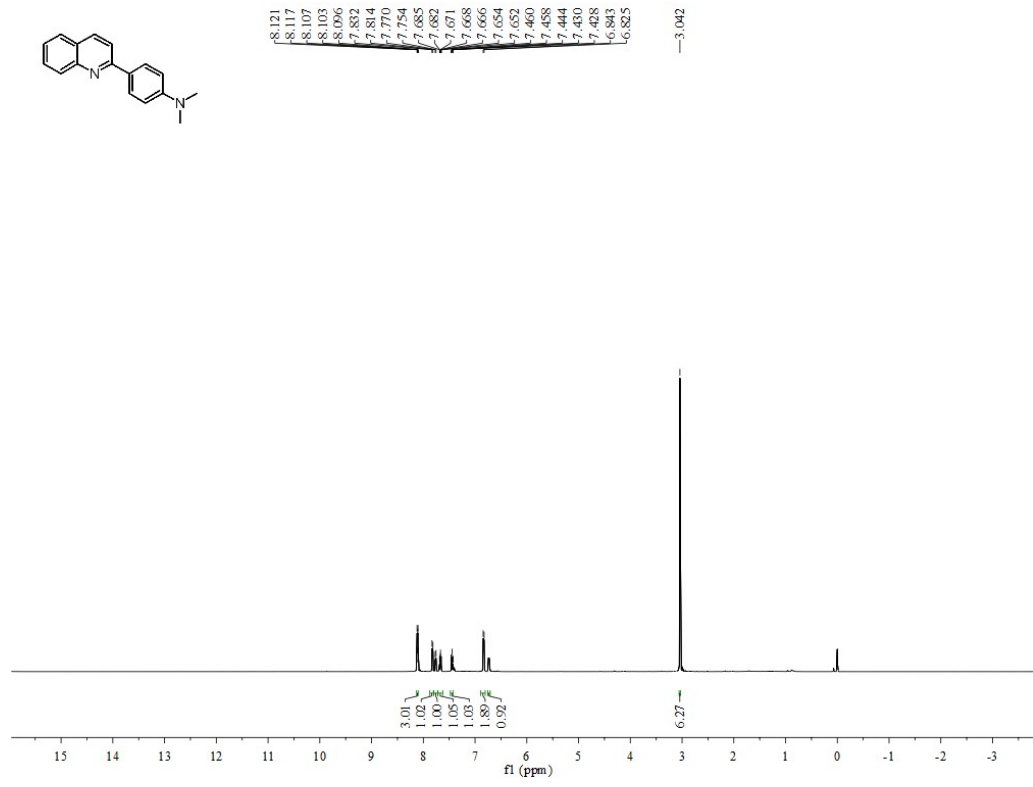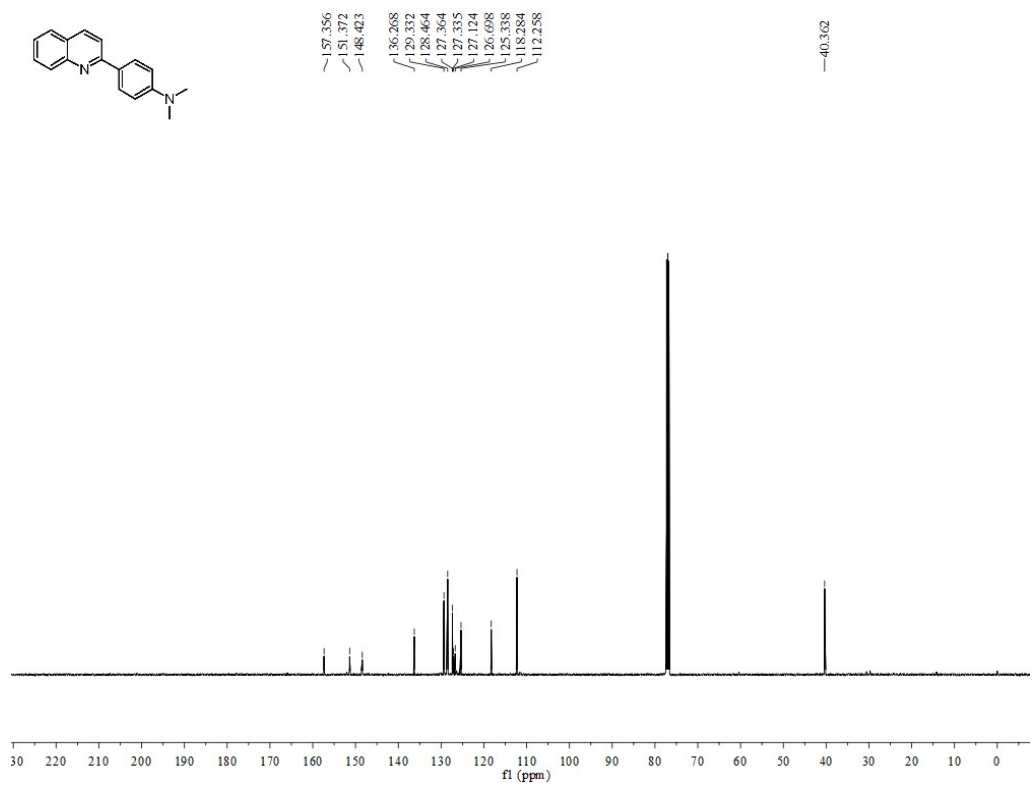

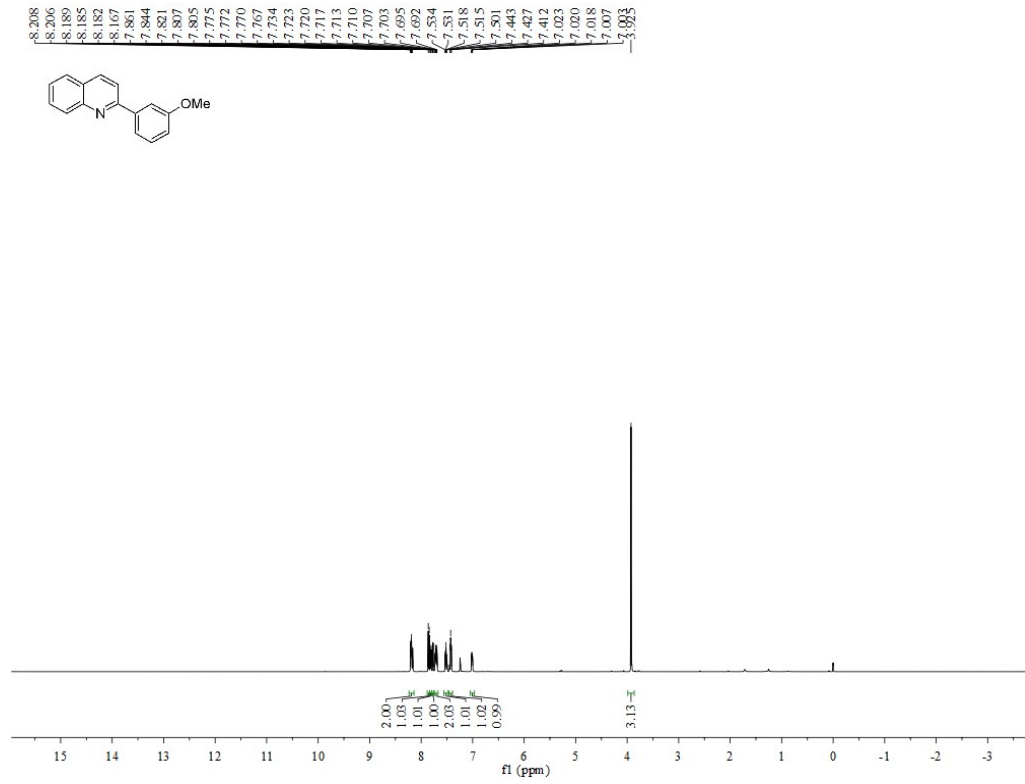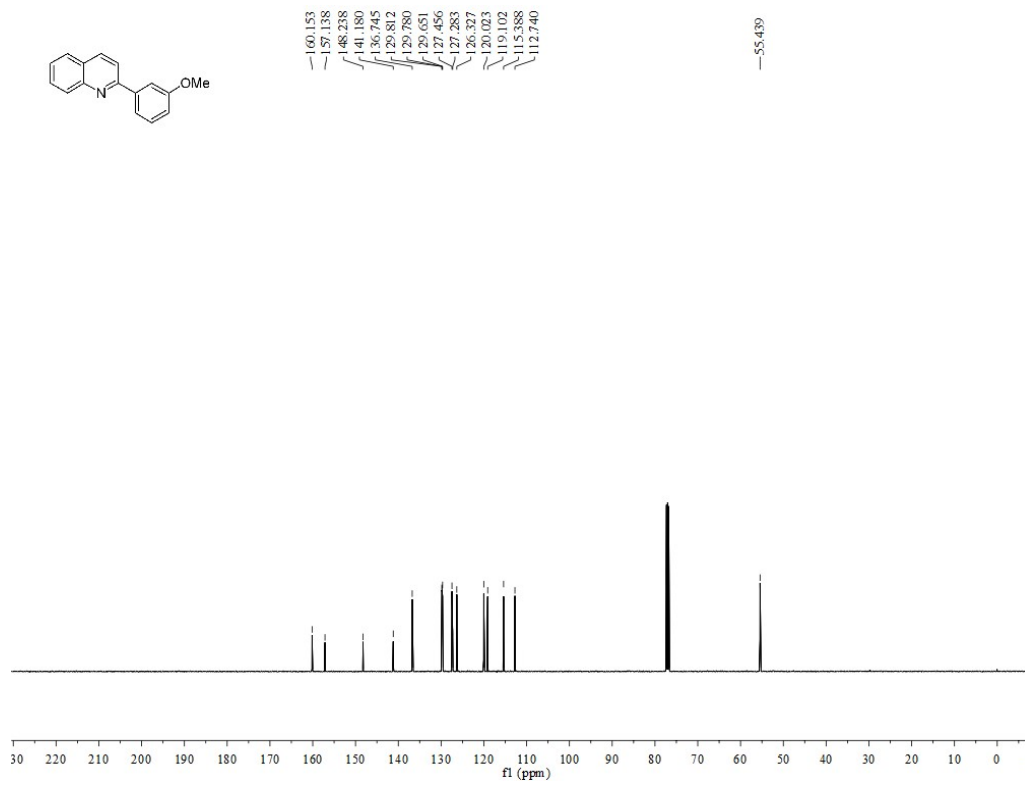

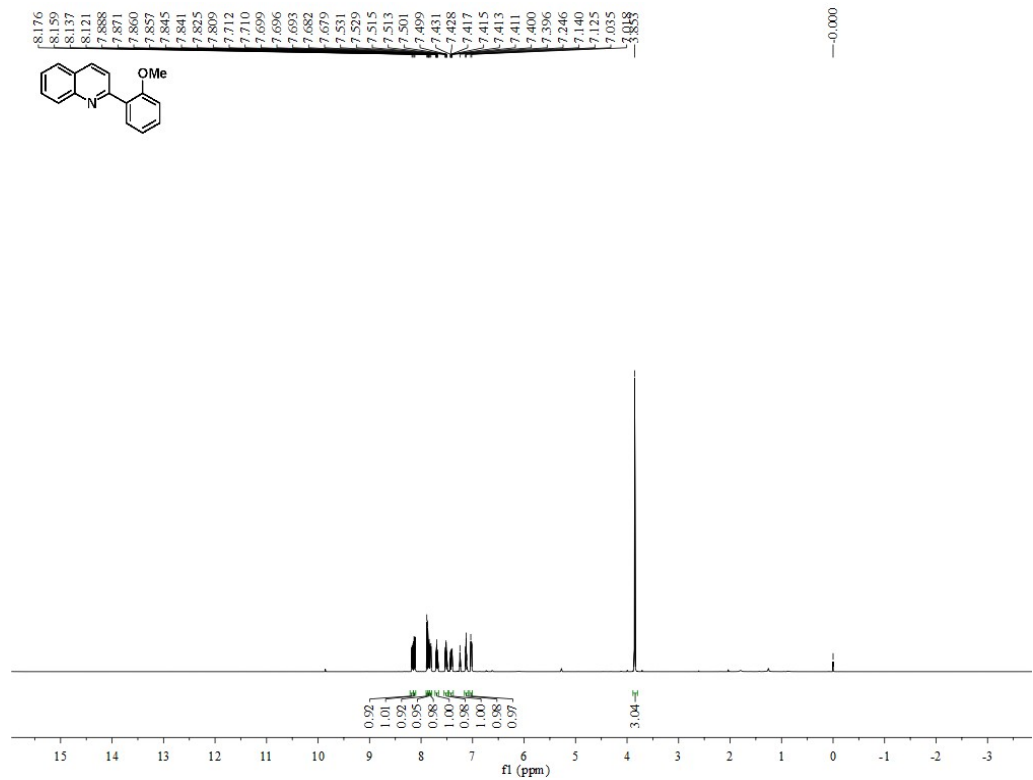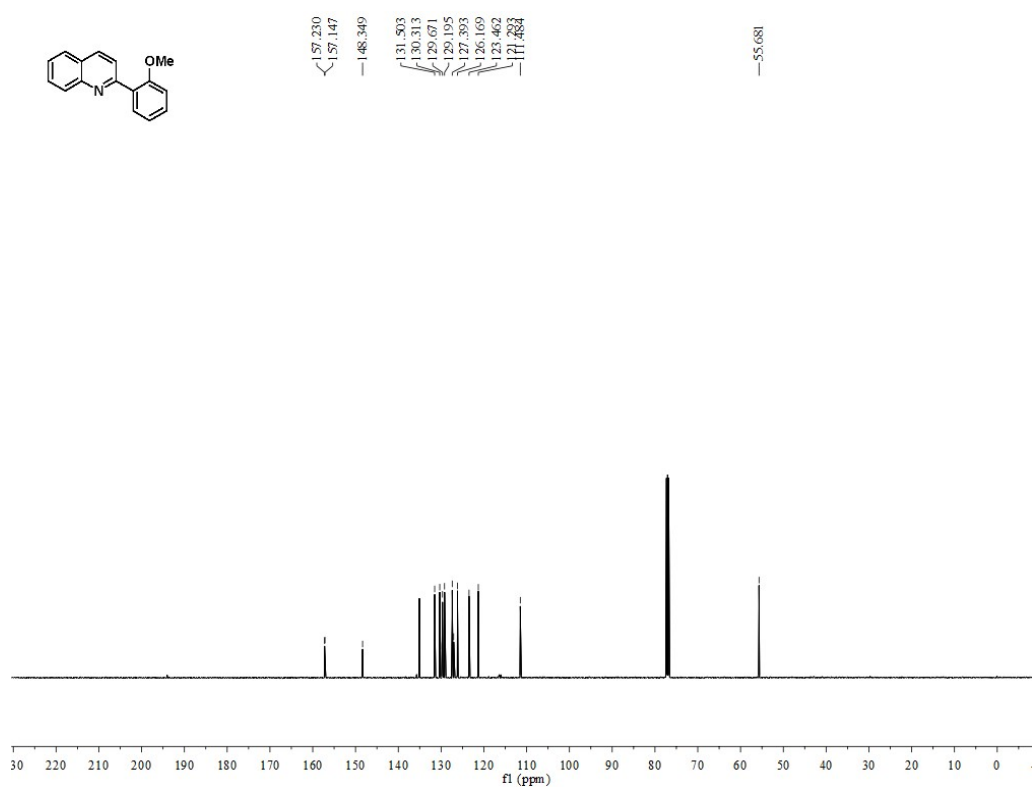

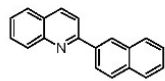

8.61  
8.61  
8.37  
8.36  
8.35  
8.24  
8.23  
8.22  
8.02  
8.00  
7.99  
7.98  
7.89  
7.89  
7.88  
7.88  
7.84  
7.84  
7.82  
7.82  
7.76  
7.75  
7.74  
7.74  
7.74  
7.73  
7.72  
7.53  
7.51

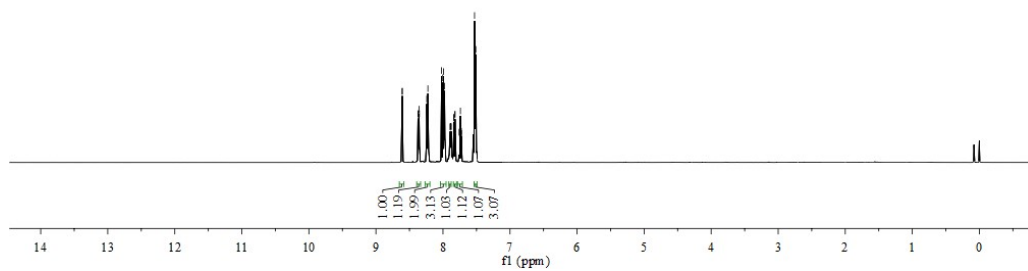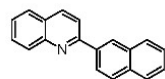

157.17  
148.35  
136.93  
136.86  
133.89  
133.52  
129.76  
129.72  
128.85  
128.59  
127.74  
127.51  
127.25  
127.19  
126.74  
126.37  
126.35  
125.08  
119.18

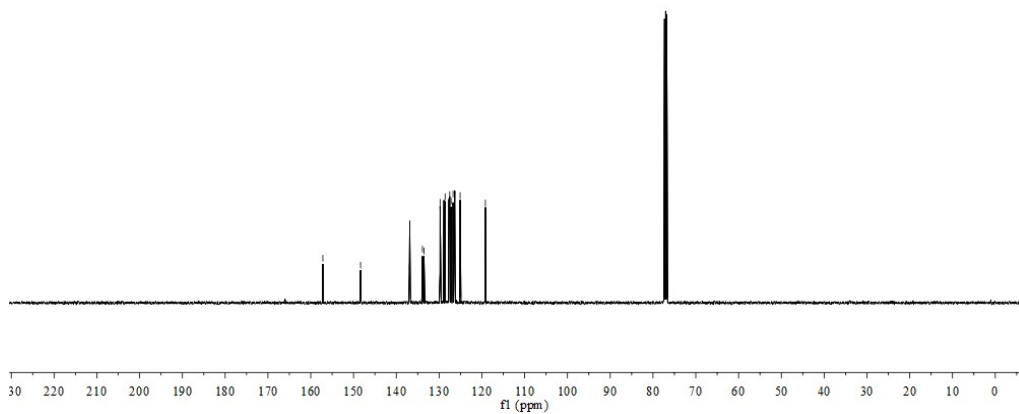



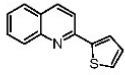

8.115  
8.098  
8.092  
8.073  
7.782  
7.764  
7.756  
7.740  
7.722  
7.715  
7.697  
7.683  
7.680  
7.677  
7.666  
7.485  
7.482  
7.471  
7.468  
7.466  
7.461  
7.458  
7.454  
7.451  
7.448  
7.243  
7.153  
7.146  
7.143  
7.136

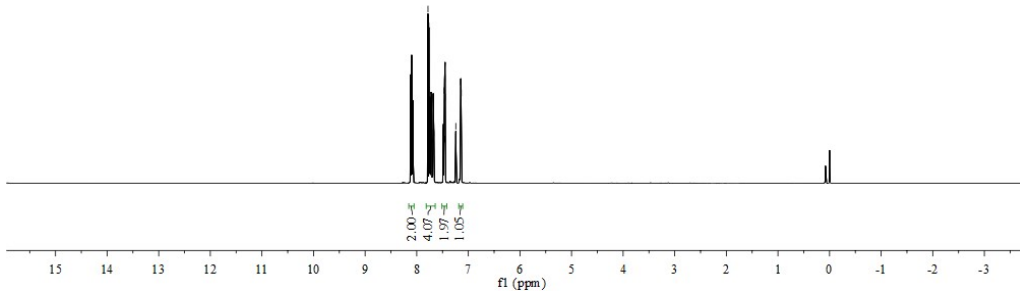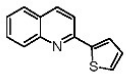

152.36  
148.14  
145.42  
139.83  
139.29  
138.60  
138.09  
127.89  
117.17

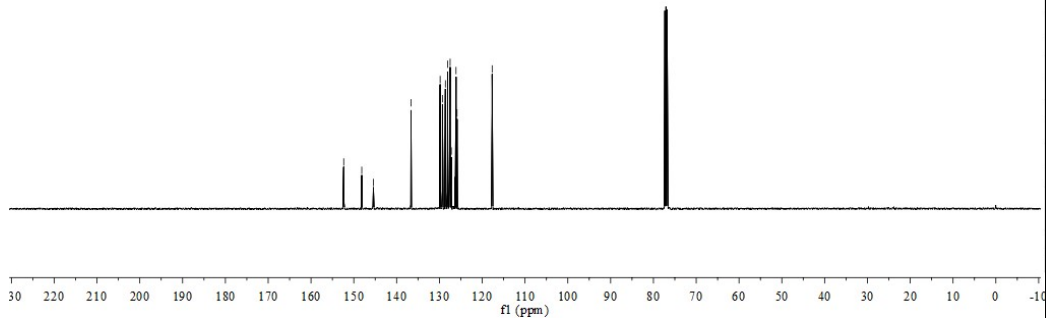

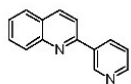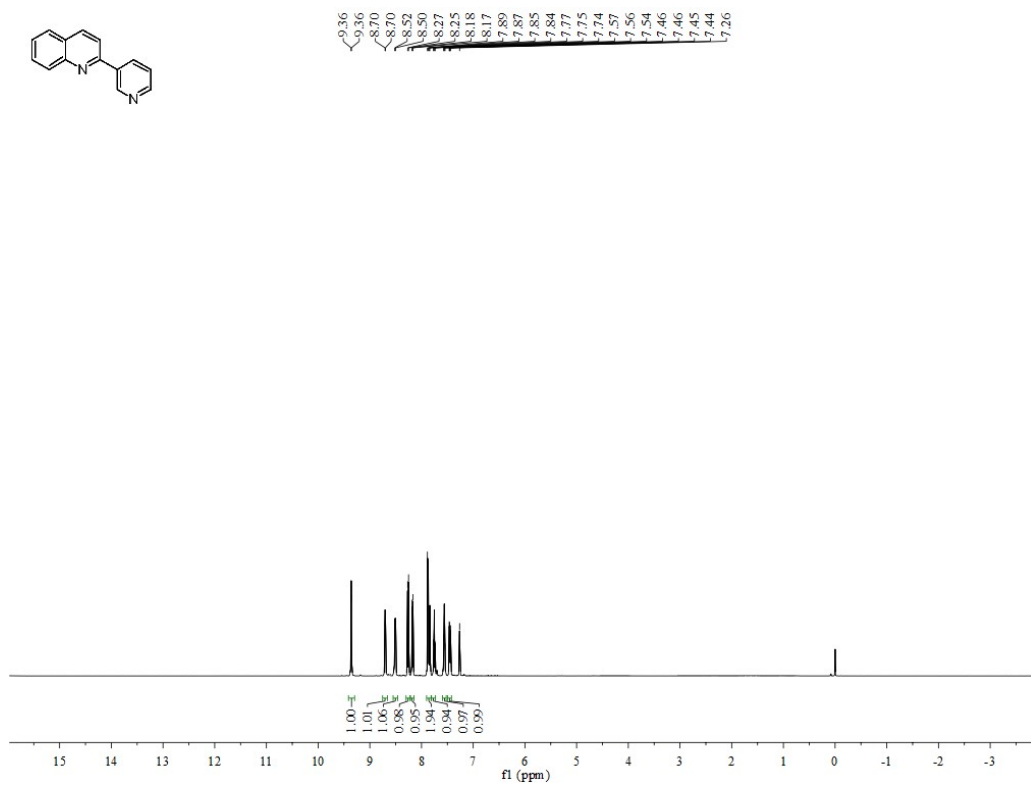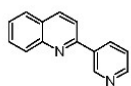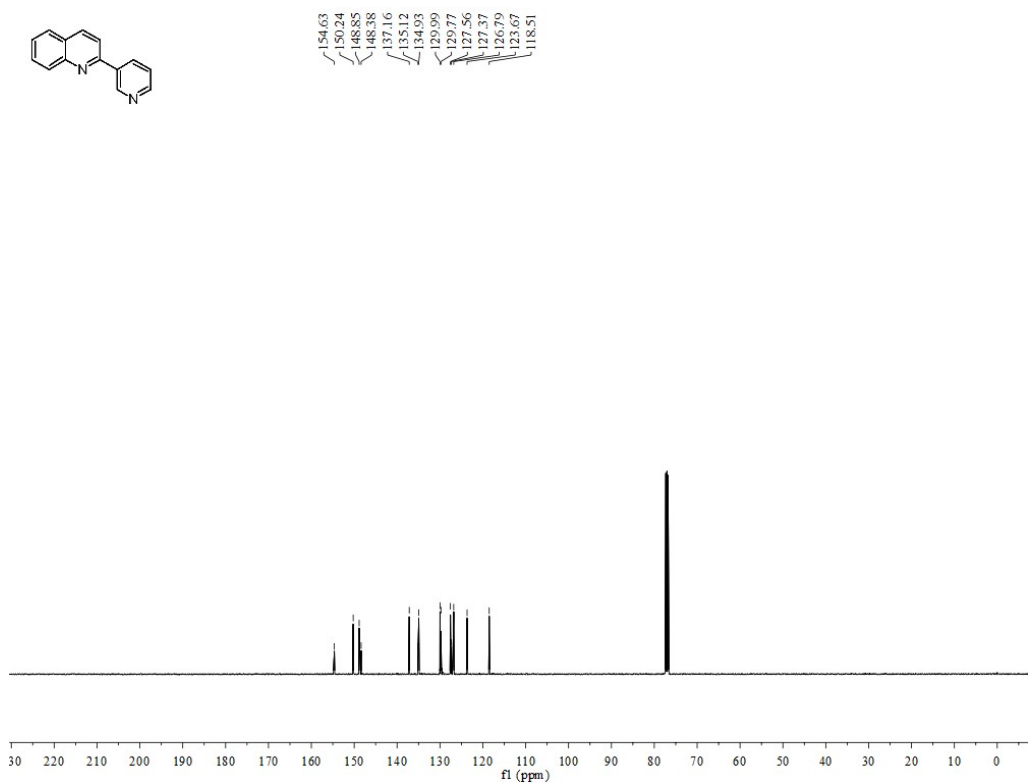

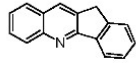

8.29  
8.29  
8.28  
8.19  
8.17  
8.15  
7.80  
7.80  
7.79  
7.79  
7.70  
7.69  
7.68  
7.68  
7.68  
7.67  
7.66  
7.59  
7.58  
7.58  
7.51  
7.50  
7.49  
7.49  
7.49  
7.48  
7.48  
7.47  
7.47  
7.47  
-4.00

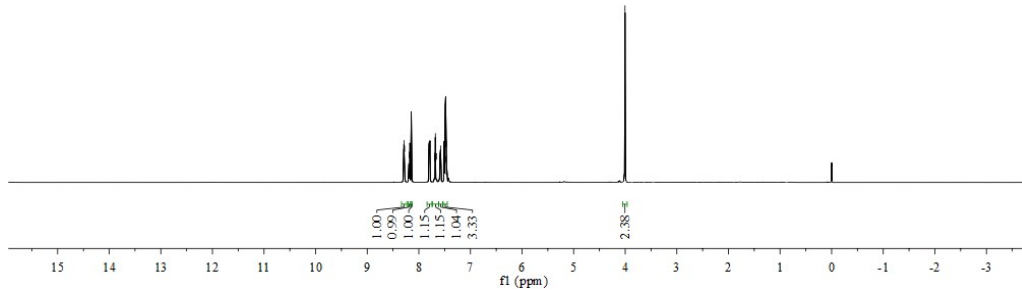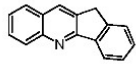

161.67  
148.04  
145.09  
140.35  
134.60  
131.15  
129.96  
129.11  
128.81  
127.76  
127.52  
127.40  
125.67  
125.44  
122.11

34.02

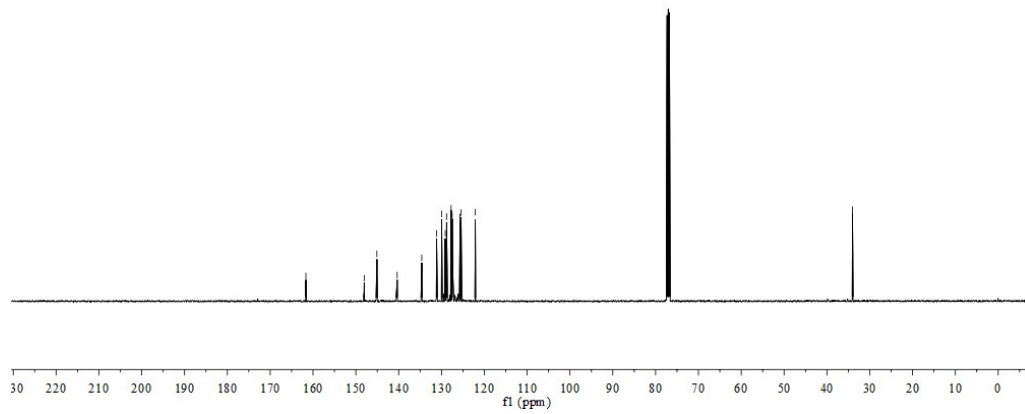

Supplement: d4ob00827h1.pdf [file d4ob00827h1.pdf]
